# Supplementary material for: Ag(i)-catalyzed diastereoselective oxidative cyclopropanation of prochiral alkyne-tethered 1,3-dicarbonitriles
Source: Royal Society of Chemistry journal article supplement (doi:10.1039/d4cc03697b), 2024-01-01

## Supporting Information

### Ag(I)-Catalyzed Diastereoselective Oxidative Cyclopropanation of Prochiral Alkyne-tethered 1,3-Dicarbonitriles

N. Navaneetha, Anandarao Munakala, and Rambabu Chegondi\*

E-mail: [rchegondi@iict.res.in](mailto:rchegondi@iict.res.in); [cramhcu@gmail.com](mailto:cramhcu@gmail.com)

|                                                      | <b>Pages</b> |
|------------------------------------------------------|--------------|
| I. General details                                   | S-2          |
| II. Additional Screening data                        | S-03 to S-04 |
| III. Experimental procedures and analytical data     | S-05 to S-33 |
| IIIA. Experimental procedures for substrates         | S-05 to S-20 |
| IIIB. Experimental procedures for products           | S-20 to S-30 |
| IIIC. Gram-scale synthesis and Synthetic utility     | S-30 to S-33 |
| IV. X-ray crystallographic data                      | S-33 to S-35 |
| V. Reference                                         | S-35         |
| VII. <sup>1</sup> H NMR, <sup>13</sup> C NMR spectra | S-36 to S-94 |

## I. General details

**General information:** Unless otherwise noted, all reagents were used as received from commercial suppliers. Silver-catalysts and HClO<sub>4</sub> were purchased from Sigma-Aldrich and used without further purification. All reactions were performed under inert atmosphere and in a flame-dried or oven-dried glassware with magnetic stirring. All solvents were dried before use following the standard procedures. Reactions were monitored using thin-layer chromatography (SiO<sub>2</sub>). TLC plates were visualized with UV light (254 nm), iodine treatment or using *p*-anisaldehyde stain or  $\beta$ -naphthol stain. Column chromatography was carried out using silica gel (100-200 mesh) packed in glass columns. NMR spectra were recorded at 300, 400, 500 MHz (H) and at 75, 100, 125 MHz (C), respectively. Chemical shifts ( $\delta$ ) are reported in ppm, using the residual solvent peak in CDCl<sub>3</sub> (H:  $\delta$  = 7.26 and C:  $\delta$  = 77.16 ppm) and DMSO (H:  $\delta$  = 2.50, 3.33 and C:  $\delta$  = 39.52 ppm) as internal standard, and coupling constants (*J*) are given in Hz. HRMS were recorded using ESI-TOF techniques.

## II. Additional screening for oxidative cyclopropanation:

**Table S1:** Optimization of an oxidizing agent in presence of AgNO<sub>3</sub> catalyst<sup>a,b</sup>

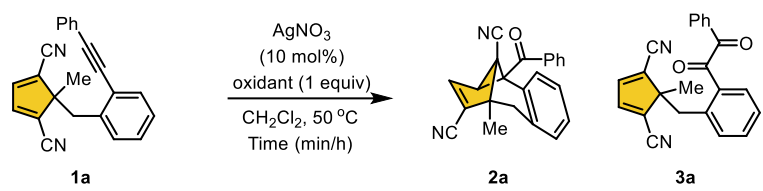

| Entry | oxidant                                      | Time   | Yield [2a%] <sup>c</sup> | Yield [3a%] <sup>c</sup> |
|-------|----------------------------------------------|--------|--------------------------|--------------------------|
| 1     | HClO <sub>4</sub>                            | 15 min | 72                       | 7                        |
| 2     | Mg(ClO <sub>4</sub> ) <sub>2</sub>           | 24 h   | NR                       | -                        |
| 3     | MCPBA                                        | 24 h   | NR                       | -                        |
| 4     | OXONE                                        | 24 h   | NR                       | -                        |
| 5     | LiClO <sub>4</sub>                           | 24 h   | NR                       | -                        |
| 6     | BAIB                                         | 24 h   | NR                       | -                        |
| 7     | H <sub>2</sub> O <sub>2</sub>                | 24 h   | NR                       | -                        |
| 8     | NaClO <sub>4</sub>                           | 24 h   | NR                       | -                        |
| 9     | K <sub>2</sub> S <sub>2</sub> O <sub>8</sub> | 24 h   | NR                       | -                        |
| 10    | Mn(OAc) <sub>2</sub>                         | 24 h   | NR                       | -                        |
| 11    | TBHP                                         | 24 h   | NR                       | -                        |
| 12    | CAN                                          | 24 h   | NR                       | -                        |
| 13    | quinoline <i>N</i> -Oxide                    | 24 h   | NR                       | -                        |
| 14    | NaIO <sub>4</sub>                            | 24 h   | NR                       | -                        |
| 15    | O <sub>2</sub>                               | 24 h   | NR                       | -                        |
| 16    | 3,4-dichloroisoquinoline 2-oxide             | 24 h   | NR                       | -                        |
| 17    | DMSO                                         | 24 h   | NR                       | -                        |
| 18    | DPSO                                         | 24 h   | NR                       | -                        |

[a] Reaction conditions: **1a** (0.2 mmol, 1 equiv) in CH<sub>2</sub>Cl<sub>2</sub> (2 mL, 0.1 M) at 50 °C. [b] Used ~70% aqueous HClO<sub>4</sub> solution. [c] Isolated yields. DPSO = Diphenyl sulfoxide

**Table S2:** Optimization of HClO<sub>4</sub> loading<sup>a,b</sup>

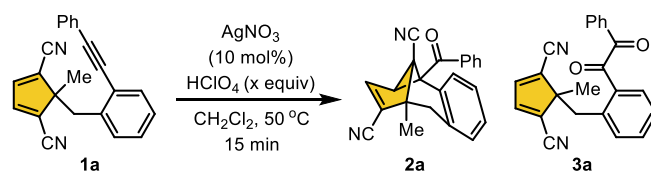

| Entry          | HClO <sub>4</sub> (equiv) | Yield [2a%] <sup>c</sup> | Yield [3a%] <sup>c</sup> |
|----------------|---------------------------|--------------------------|--------------------------|
| 1 <sup>d</sup> | 0.5                       | 30                       | 11                       |
| 2              | 1.0                       | 72                       | 7                        |
| 3              | 1.5                       | 59                       | 30                       |
| 4              | 2.0                       | 20                       | 54                       |

[a] Reaction conditions: **1a** (0.2 mmol, 1 equiv) in CH<sub>2</sub>Cl<sub>2</sub> (2 mL, 0.1 M) at 50 °C. [b] Used ~70% aqueous HClO<sub>4</sub> solution. [c] Isolated yields. [d] More than 27% SM was recovered.

**Table S3:** Optimization of solvents<sup>a,b</sup>

Reaction scheme showing the conversion of **1a** to **2a** and **3a** using  $\text{AgNO}_3$  (10 mol%) and  $\text{HClO}_4$  (1 equiv) in various solvents at 50 °C.

| entry | solvents                 | time   | yield [ <b>2a</b> %] <sup>c</sup> | yield [ <b>3a</b> %] <sup>c</sup> |
|-------|--------------------------|--------|-----------------------------------|-----------------------------------|
| 1     | $\text{CH}_2\text{Cl}_2$ | 15 min | 72                                | 7                                 |
| 2     | DCE                      | 24 h   | <5                                | -                                 |
| 3     | THF                      | 24 h   | NR                                | -                                 |
| 4     | DMF                      | 24 h   | NR                                | -                                 |
| 5     | DMSO                     | 24 h   | NR                                | -                                 |
| 6     | $\text{Et}_2\text{O}$    | 24 h   | NR                                | -                                 |
| 7     | MTBE                     | 24 h   | NR                                | -                                 |
| 8     | ACN                      | 24 h   | NR                                | -                                 |
| 9     | MeOH                     | 24 h   | NR                                | -                                 |
| 10    | toluene                  | 24 h   | NR                                | -                                 |
| 11    | <sup>t</sup> BuOH        | 24 h   | NR                                | -                                 |
| 12    | Benzene                  | 24 h   | NR                                | -                                 |
| 13    | MeTHF                    | 24 h   | NR                                | -                                 |
| 14    | 1,4-dioxane              | 24 h   | NR                                | -                                 |
| 15    | $\text{H}_2\text{O}$     | 24 h   | NR                                | -                                 |

[a] Reaction conditions: **1a** (0.2 mmol, 1 equiv) in solvent (2 mL, 0.1 M) at 50 °C. [b] Used ~70% aqueous  $\text{HClO}_4$  solution. [c] Isolated yields.

### Miscellaneous reactions:

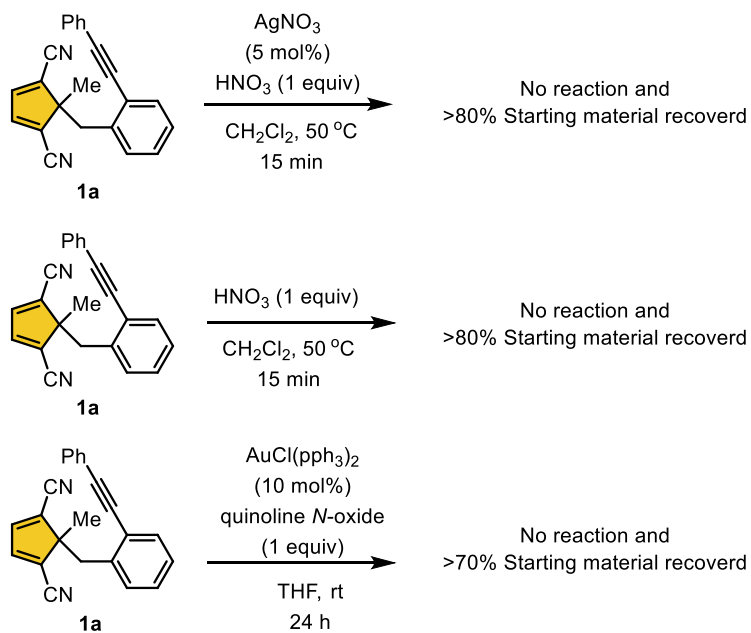

### III. Experimental procedures and analytical data

#### III.A. Experimental procedures and analytical data of substrates

##### General procedure for the synthesis of 2,2-disubstituted-1,3-cyclopentanones:<sup>1</sup>

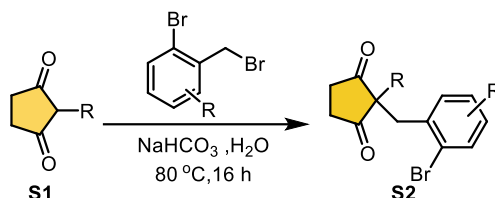

To a vigorously stirred suspension of 2-substituted 1,3-cyclopentanedione **S1** (1 equiv) in water (1.0 M), was gradually added powdered  $\text{NaHCO}_3$  (1 equiv) and stirred for additional 30 minutes. Then benzyl bromide (1.2 equiv) or substituted benzyl bromide was added to the reaction mixture and stirred at 80 °C in preheated oil bath for 16 h. Later, the reaction mixture was extracted with  $\text{CH}_2\text{Cl}_2$  (2 times) and the combined organic solvent was washed with 5%  $\text{NH}_4\text{Cl}$  aqueous solution and dried over anhydrous  $\text{Na}_2\text{SO}_4$  and concentrated in *vacuo*. The obtained crude residue was purified by flash column chromatography (hexane/EtOAc).

##### General procedure for the synthesis of cyclopentane-1,3-dihydroxy dicarbonitrile:<sup>2</sup>

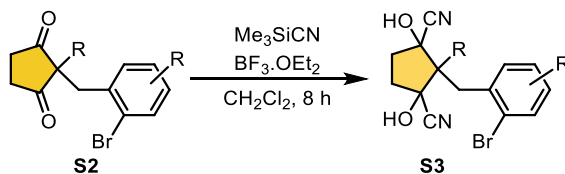

$\text{Me}_3\text{SiCN}$  (2.1 equiv) and  $\text{BF}_3\cdot\text{OEt}_2$  (2 equiv) were added dropwise consecutively to a stirred solution of **S2** (1 equiv) in dry  $\text{CH}_2\text{Cl}_2$  (0.3 M) under nitrogen atmosphere. The resulting mixture was heated at reflux using preheated oil bath for 8 h, the reaction was quenched at 0 °C by adding aqueous hydrochloric acid (1.0 M). The organic layer was collected and the aqueous layer was extracted with  $\text{CH}_2\text{Cl}_2$  (two times). The combined organic layers were washed with brine, and dried over anhydrous  $\text{Na}_2\text{SO}_4$ . After removal of the solvent, the residue was used for next step without further purification.

##### General procedure for the synthesis of cyclopentane-1,3 dicarbonitrile:<sup>2</sup>

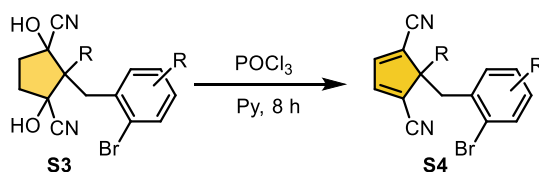

Crude compounds **S3** (1 equiv) were dissolved in pyridine (0.5 M) followed by the addition of POCl<sub>3</sub> (5 equiv) under nitrogen atmosphere. After heating at 60 °C for 5 h, the reaction mixture was cooled to 0 °C and CH<sub>2</sub>Cl<sub>2</sub> was added. Then, the mixture was poured into hydrochloric acid (2 M) slowly. After filtration through a pad of Celite, the filtration cake was washed with CH<sub>2</sub>Cl<sub>2</sub> and the filtrate was moved into a separating funnel. The organic layer was collected, and the aqueous layer was extracted with CH<sub>2</sub>Cl<sub>2</sub>. The combined organic layers were washed with a saturated solution of sodium bicarbonate and brine, and dried over anhydrous Na<sub>2</sub>SO<sub>4</sub>. After removal of the organic solvent, the residue was purified by column chromatography on silica gel by using a mixture of hexanes and ethyl acetate as the mobile phase to yield **S4**.

### 2-(2-Bromobenzyl)-2-methylcyclopenta-3,5-diene-1,3-dicarbonitrile (**S4**):

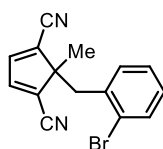

Prepared according to the above-described procedure, overall yield 93% (2.3 g) over two steps. It was purified by flash chromatography (5% EtOAc/hexanes;  $R_f = 0.3$ ) to afford a yellow solid; mp = 110–112 °C; <sup>1</sup>H NMR (400 MHz, CDCl<sub>3</sub>) δ 7.52 – 7.40 (m, 1H), 7.26 – 7.11 (m, 2H), 7.09 – 6.99 (m, 1H), 6.91 (s, 2H), 3.29 (s, 2H), 1.49 (s, 3H); <sup>13</sup>C NMR (101 MHz, CDCl<sub>3</sub>) δ 141.7, 134.0, 133.4, 131.8, 130.7, 129.4, 127.2, 125.6, 114.4, 62.8, 40.6, 20.1; HRMS (ESI) calcd for C<sub>15</sub>H<sub>12</sub>N<sub>2</sub>Br [M+H]<sup>+</sup>: 299.0180; found: 299.0178.

### General procedure-A for the synthesis of substrate 1:

#### Sonogashira coupling for the synthesis of cyclopentane-1,3 dicarbonitrile alkynes **S5**:

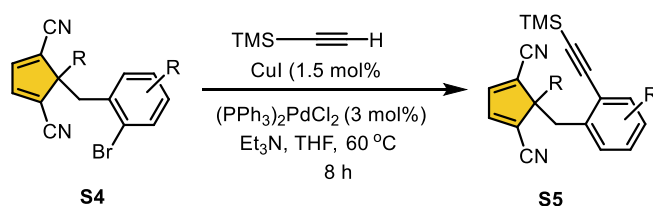

To a solution of **S4** (1 equiv) in anhydrous THF (0.5 M), was added Pd(PPh<sub>3</sub>)<sub>2</sub>Cl<sub>2</sub> (2 mol%), CuI (5 mol%), Et<sub>3</sub>N (1.7 equiv) and TMS acetylene (1.2 equiv). The mixture was stirred at 60 °C for 8 h. The reaction was cooled to room temperature, diluted with water, and the mixture was extracted with EtOAc. The combined organic phase was dried over anhydrous Na<sub>2</sub>SO<sub>4</sub>, and concentrated in *vacuo*. The obtained crude residue was purified by flash chromatography (hexane/EtOAc).

## Synthesis of cyclopentane-1,3-dicarbonitrile alkynes **S6**:

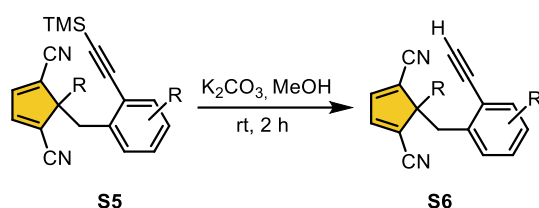

**S5** (1.0 mmol, 1.0 equiv) was dissolved in 15 mL of dry methanol. After the addition of potassium carbonate (1.3 equiv), the mixture was stirred for 2 h at room temperature. The precipitated solid was filtered off and washed with EtOAc (20 mL). The mixture was concentrated in *vacuo*. and the residue was purified by flash column chromatography on silica gel to afford cyclopentane-1,3-dicarbonitrile alkynes **S6**.

## 2-(2-Ethynylbenzyl)-2-methylcyclopenta-3,5-diene-1,3-dicarbonitrile (**S6**):

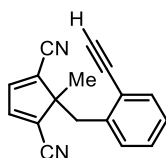

Prepared according to the described above in 85% yield (1.7 g). It was purified by flash chromatography (5% EtOAc/hexanes;  $R_f = 0.3$ ) to afford a colorless oil;  $^1\text{H}$  NMR (400 MHz,  $\text{CDCl}_3$ )  $\delta$  7.46 (d,  $J = 7.3$  Hz, 1H), 7.30 – 7.17 (m, 3H), 6.93 (s, 2H), 3.41 (s, 2H), 3.35 (s, 1H), 1.55 (s, 3H);  $^{13}\text{C}$  NMR (101 MHz,  $\text{CDCl}_3$ )  $\delta$  141.7, 136.6, 133.3, 130.8, 130.2, 128.5, 127.6, 122.9, 114.5, 83.5, 82.0, 63.2, 39.2, 20.1; HRMS (ESI) calcd for  $\text{C}_{17}\text{H}_{13}\text{N}_2$   $[\text{M}+\text{H}]^+$ : 245.1079; found: 245.1104.

## Sonogashira coupling of **S6** with aryl halides for the synthesis of substrate **1**:<sup>3</sup>

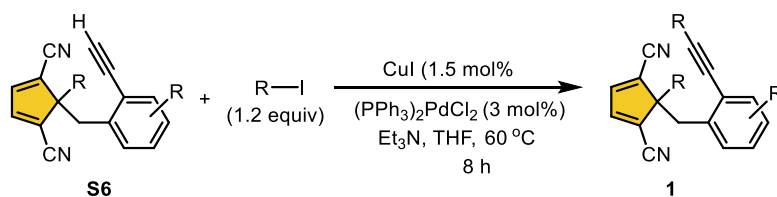

To a solution of **S6** (4.0 mmol, 1 equiv) in anhydrous THF (0.5 M), was added  $\text{Pd}(\text{PPh}_3)_2\text{Cl}_2$  (2 mol%),  $\text{CuI}$  (5 mol%),  $\text{Et}_3\text{N}$  (1.7 equiv) and aryl iodide (1.2 equiv). The mixture was stirred at 60 °C for 8h. The reaction was cooled to room temperature, diluted with water, and the mixture was extracted with EtOAc. The combined organic phase was dried over anhydrous  $\text{Na}_2\text{SO}_4$ , and concentrated in *vacuo*. The obtained crude residue was purified by flash chromatography (hexane/EtOAc) to afford **1**.

## General procedure-B for the synthesis of substrate 1:

### Sonogashira coupling of S4 with alkynes for the synthesis of substrate 1:

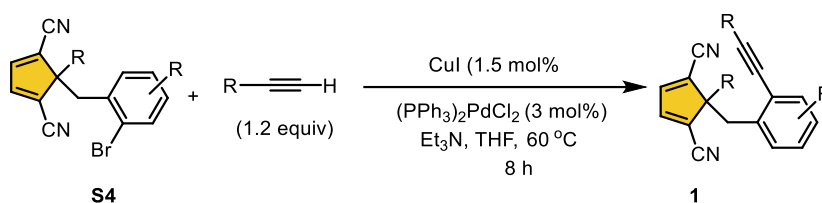

To a solution of **S4** (1 equiv) in anhydrous THF (0.5 M), was added Pd(PPh<sub>3</sub>)<sub>2</sub>Cl<sub>2</sub> (2 mol%), CuI (5 mol%), Et<sub>3</sub>N (1.7 equiv) and substituted acetylene (1.3 equiv). The mixture was stirred at 60 °C for 8 h. The reaction was cooled to room temperature, diluted with water, and the mixture was extracted with EtOAc. The combined organic phase was dried over anhydrous Na<sub>2</sub>SO<sub>4</sub>, and concentrated in *vacuo*. The obtained crude residue was purified by flash chromatography (hexane/EtOAc) to give desired substrate **1**.

### 2-Methyl-2-(2-(phenylethynyl)benzyl)cyclopenta-3,5-diene-1,3-dicarbonitrile (**1a**):

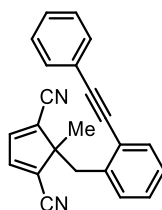

Prepared according to the general procedure-B as described above in 90% yield (96 mg). It was purified by flash chromatography (10% EtOAc/hexanes;  $R_f = 0.3$ ) to afford a colorless solid; mp = 149–151 °C; <sup>1</sup>H NMR (400 MHz, CDCl<sub>3</sub>) δ 7.50 – 7.46 (m, 3H), 7.36 – 7.27 (m, 3H), 7.23 – 7.12 (m, 3H), 6.88 (s, 2H), 3.34 (s, 2H), 1.48 (s, 3H); <sup>13</sup>C NMR (101 MHz, CDCl<sub>3</sub>) δ 141.4, 135.8, 132.9, 131.7, 131.1, 130.3, 128.6, 128.5, 128.0, 127.8, 124.4, 123.2, 114.3, 94.9, 88.2, 63.1, 39.6, 19.7; HRMS (ESI) calcd for C<sub>23</sub>H<sub>17</sub>N<sub>2</sub> [M+H]<sup>+</sup>: 321.1386; found: 321.1386.

### 2-Methyl-2-(2-(p-tolyethynyl)benzyl)cyclopenta-3,5-diene-1,3-dicarbonitrile (**1b**):

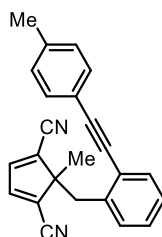



Prepared according to the general procedure-B as described above in 87% yield (98 mg). It was purified by flash chromatography (10% EtOAc/hexanes;  $R_f = 0.4$ ) to afford a colorless solid; mp = 156–158 °C;  $^1\text{H NMR}$  (500 MHz,  $\text{CDCl}_3$ )  $\delta$  7.58 – 7.55 (m, 1H), 7.46 (d,  $J = 8.0$  Hz, 2H), 7.35 – 7.25 (m, 3H), 7.20 (d,  $J = 8.1$  Hz, 2H), 6.97 (s, 2H), 3.43 (s, 2H), 2.40 (s, 3H), 1.58 (s, 3H);  $^{13}\text{C NMR}$  (101 MHz,  $\text{CDCl}_3$ )  $\delta$  141.3, 135.7, 132.8, 131.6, 130.3, 129.3, 127.8, 127.8, 124.6, 120.2, 114.3, 95.1, 87.5, 63.1, 39.6, 21.7, 19.6.; HRMS (ESI) calcd for  $\text{C}_{24}\text{H}_{19}\text{N}_2$   $[\text{M}+\text{H}]^+$ : 335.1544; found: 335.1542.

**2-(2-((4-(Tert-butyl)phenyl)ethynyl)benzyl)-2-methylcyclopenta-3,5-diene-1,3-dicarbonitrile (1c):**

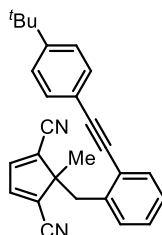

Prepared according to the general procedure-B as described above in 88% yield (111 mg). It was purified by flash chromatography (10% EtOAc/hexanes;  $R_f = 0.3$ ) to afford a colorless solid; mp = 153–155 °C;  $^1\text{H NMR}$  (400 MHz,  $\text{CDCl}_3$ )  $\delta$  7.58 – 7.53 (m, 1H), 7.51 – 7.48 (m, 2H), 7.43 – 7.37 (m, 2H), 7.31 – 7.21 (m, 3H), 6.96 (s, 2H), 3.41 (s, 2H), 1.56 (s, 3H), 1.34 (s, 9H);  $^{13}\text{C NMR}$  (101 MHz,  $\text{CDCl}_3$ )  $\delta$  151.8, 141.4, 135.6, 132.8, 131.4, 131.1, 130.3, 127.8, 127.8, 125.5, 124.6, 120.2, 114.3, 95.0, 87.5, 63.0, 39.5, 34.9, 31.3, 19.5; HRMS (ESI) calcd for  $\text{C}_{27}\text{H}_{25}\text{N}_2$   $[\text{M}+\text{H}]^+$ : 377.2008; found: 377.2012.

**2-(2-((4-Methoxyphenyl)ethynyl)benzyl)-2-methylcyclopenta-3,5-diene-1,3-dicarbonitrile (1d):**

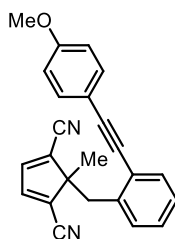

Prepared according to the general procedure-A as described above in 83% yield (119 mg). It was purified by flash chromatography (10% EtOAc/hexanes;  $R_f = 0.3$ ) to afford a colorless solid; mp = 145–147 °C;  $^1\text{H NMR}$  (400 MHz,  $\text{CDCl}_3$ )  $\delta$  7.50 – 7.37 (m, 3H), 7.25 – 7.13 (m, 3H), 6.87 (s, 2H), 6.85 – 6.79 (m, 2H), 3.76 (s, 3H), 3.33 (s, 2H), 1.48 (s, 3H);  $^{13}\text{C NMR}$  (126 MHz,  $\text{CDCl}_3$ )  $\delta$  159.9, 141.3, 135.5, 133.2, 132.7, 131.2, 130.3, 127.8, 127.7, 124.7, 115.4, 114.4, 114.2, 95.0, 86.9, 63.2, 55.5, 39.6, 19.7; HRMS (ESI) calcd for  $\text{C}_{24}\text{H}_{19}\text{N}_2\text{O}$   $[\text{M}+\text{H}]^+$ : 351.1497; found: 351.1501.

**2-(2-((4-(Benzyloxy)phenyl)ethynyl)benzyl)-2-methylcyclopenta-3,5-diene-1,3-dicarbonitrile (1e):**

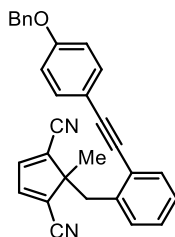

Prepared according to the general procedure-A as described above in 85% yield (148 mg). It was purified by flash chromatography (10% EtOAc/hexanes;  $R_f = 0.4$ ) to afford a colorless solid; mp = 137–139 °C;  $^1\text{H}$  NMR (400 MHz,  $\text{CDCl}_3$ )  $\delta$  7.50 – 7.45 (m, 1H), 7.40 – 7.31 (m, 4H), 7.30 – 7.24 (m, 1H), 7.22 – 7.14 (m, 4H), 7.12 (dd,  $J = 2.5, 1.3$  Hz, 1H), 7.10 – 7.06 (m, 1H), 6.91 (ddd,  $J = 8.3, 2.6, 1.0$  Hz, 1H), 6.85 (s, 2H), 5.02 (s, 2H), 3.32 (s, 2H), 1.47 (s, 3H);  $^{13}\text{C}$  NMR (101 MHz,  $\text{CDCl}_3$ )  $\delta$  158.7, 141.4, 136.9, 135.8, 132.9, 131.1, 130.3, 129.6, 128.7, 128.1, 128.1, 127.8, 127.6, 124.6, 124.3, 117.4, 116.2, 114.3, 94.7, 88.0, 70.2, 63.1, 39.6, 19.6; HRMS (ESI) calcd for  $\text{C}_{30}\text{H}_{23}\text{N}_2\text{O}$   $[\text{M}+\text{H}]^+$ : 427.1799; found: 427.1804.

**2-(2-((4-(Allyloxy)phenyl)ethynyl)benzyl)-2-methylcyclopenta-3,5-diene-1,3-dicarbonitrile (1f):**

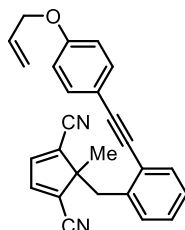

Prepared according to the general procedure-A as described above in 80% yield (123 mg). It was purified by flash chromatography (10% EtOAc/hexanes;  $R_f = 0.3$ ) to afford a colorless solid; mp = 132–134 °C;  $^1\text{H}$  NMR (400 MHz,  $\text{CDCl}_3$ )  $\delta$  7.56 – 7.49 (m, 3H), 7.29 – 7.24 (m, 3H), 6.97 (s, 2H), 6.95 – 6.91 (m, 2H), 6.08 (ddt,  $J = 17.2, 10.5, 5.3$  Hz, 1H), 5.45 (ddd,  $J = 17.3, 3.1, 1.6$  Hz, 1H), 5.33 (dq,  $J = 10.5, 1.4$  Hz, 1H), 4.59 (dt,  $J = 5.3, 1.5$  Hz, 2H), 3.42 (s, 2H), 1.58 (s, 3H);  $^{13}\text{C}$  NMR (101 MHz,  $\text{CDCl}_3$ )  $\delta$  158.9, 141.3, 135.5, 133.2, 133.0, 132.7, 131.2, 130.3, 127.8, 127.7, 124.7, 118.1, 115.6, 114.9, 114.4, 95.0, 87.0, 69.0, 63.1, 39.6, 19.7; HRMS (ESI) calcd for  $\text{C}_{26}\text{H}_{21}\text{N}_2\text{O}$   $[\text{M}+\text{H}]^+$ : 377.1644; found: 377.1648.

**2-(2-((4-(2-Bromoallyl)oxy)phenyl)ethynyl)benzyl)-2-methylcyclopenta-3,5-diene-1,3-dicarbonitrile (1g):**

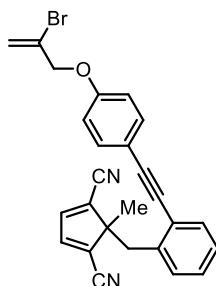

Prepared according to the general procedure-A as described above in 82% yield (153 mg). It was purified by flash chromatography (10% EtOAc/hexanes;  $R_f = 0.3$ ) to afford a colorless solid; mp = 151–153 °C;  $^1\text{H NMR}$  (400 MHz,  $\text{CDCl}_3$ )  $\delta$  7.47 – 7.39 (m, 3H), 7.20 – 7.13 (m, 3H), 6.87 (s, 2H), 6.86 – 6.81 (m, 2H), 5.93 (dd,  $J = 3.7, 1.7$  Hz, 1H), 5.62 (dt,  $J = 2.3, 1.2$  Hz, 1H), 4.59 (t,  $J = 1.4$  Hz, 2H), 3.33 (s, 2H), 1.48 (s, 3H);  $^{13}\text{C NMR}$  (101 MHz,  $\text{CDCl}_3$ )  $\delta$  158.0, 141.4, 135.6, 133.3, 132.8, 131.1, 130.3, 127.8, 126.7, 124.5, 118.1, 116.4, 115.1, 114.4, 94.6, 87.2, 71.7, 63.2, 39.6, 19.7; HRMS (ESI) calcd for  $\text{C}_{26}\text{H}_{20}\text{BrN}_2\text{O}$   $[\text{M}+\text{H}]^+$ : 455.0752; found: 455.0753.

**2-(2-((4-Fluorophenyl)ethynyl)benzyl)-2-methylcyclopenta-3,5-diene-1,3-dicarbonitrile (1h):**

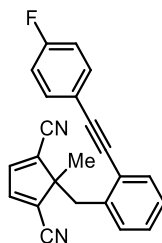

Prepared according to the general procedure-A as described above in 85% yield (118 mg). It was purified by flash chromatography (10% EtOAc/hexanes;  $R_f = 0.3$ ) to afford a colorless solid; mp = 123–124 °C;  $^1\text{H NMR}$  (400 MHz,  $\text{CDCl}_3$ )  $\delta$  7.63 – 7.48 (m, 3H), 7.40 – 7.22 (m, 3H), 7.15 – 7.04 (m, 2H), 6.97 (s, 2H), 3.44 (s, 2H), 1.58 (s, 3H);  $^{13}\text{C NMR}$  (101 MHz,  $\text{CDCl}_3$ )  $\delta$  162.8 (d,  $J_{CF} = 249.9$  Hz), 141.5, 135.7, 133.7 (d,  $J_{CF} = 8.4$  Hz), 132.9, 131.1, 130.3, 128.1, 127.8, 124.1, 119.3 (d,  $J_{CF} = 3.7$  Hz), 115.8 (d,  $J_{CF} = 22.2$  Hz), 114.4, 93.8, 87.8, 63.2, 39.6, 19.8;  $^{19}\text{F NMR}$  (377 MHz,  $\text{CDCl}_3$ )  $\delta$  -118.58; HRMS (ESI) calcd for  $\text{C}_{23}\text{H}_{14}\text{N}_2\text{F}$   $[\text{M}-\text{H}]^-$ : 337.1137; found: 337.1135.

**2-(2-((4-Chlorophenyl)ethynyl)benzyl)-2-methylcyclopenta-3,5-diene-1,3-dicarbonitrile (1i):**

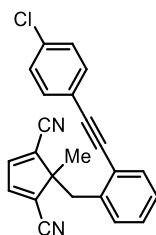

Prepared according to the general procedure-A as described above in 88% yield (128 mg). It was purified by flash chromatography (10% EtOAc/hexanes;  $R_f = 0.3$ ) to afford a colorless solid; mp = 131–133 °C;  $^1\text{H NMR}$  (400 MHz,  $\text{CDCl}_3$ )  $\delta$  7.53 – 7.47 (m, 3H), 7.37 – 7.31 (m, 2H), 7.28 – 7.18 (m, 3H), 6.93 (s, 2H), 3.40 (s, 2H), 1.54 (s, 3H);  $^{13}\text{C NMR}$  (126 MHz,  $\text{CDCl}_3$ )  $\delta$  141.5, 135.8, 134.7, 133.0, 133.0, 131.0, 130.3, 128.9, 128.2, 127.8, 123.9, 121.7, 114.4, 93.7, 89.0, 63.2, 39.6, 19.8; HRMS (ESI) calcd for  $\text{C}_{23}\text{H}_{16}\text{ClN}_2$   $[\text{M}+\text{H}]^+$ : 355.0992; found: 355.1007.

**2-(2-((4-Bromophenyl)ethynyl)benzyl)-2-methylcyclopenta-3,5-diene-1,3-dicarbonitrile (1j):**

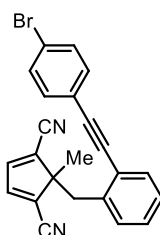

Prepared according to the general procedure-A as described above in 92% yield (150 mg). It was purified by flash chromatography (10% EtOAc/hexanes;  $R_f = 0.3$ ) to afford a yellow solid; mp = 124–126 °C;  $^1\text{H NMR}$  (400 MHz,  $\text{CDCl}_3$ )  $\delta$  7.59 – 7.50 (m, 3H), 7.49 – 7.42 (m, 2H), 7.35 – 7.14 (m, 3H), 6.97 (s, 2H), 3.44 (s, 2H), 1.58 (s, 3H);  $^{13}\text{C NMR}$  (126 MHz,  $\text{CDCl}_3$ )  $\delta$  141.5, 135.7, 132.8, 131.1, 130.3, 130.0, 129.2, 127.9, 127.8, 125.5, 124.3, 122.3, 114.4, 90.1, 87.6, 63.2, 39.6, 19.8; HRMS (ESI) calcd for  $\text{C}_{23}\text{H}_{14}\text{BrN}_2$   $[\text{M}-\text{H}]^-$ : 397.0334; found: 397.0334.

**2-(2-([1,1'-Biphenyl]-4-ylethynyl)benzyl)-2-methylcyclopenta-3,5-diene-1,3-dicarbonitrile (1k):**

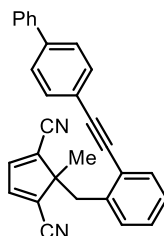

Prepared according to the general procedure-A as described above in 95% yield (154 mg). It was purified by flash chromatography (10% EtOAc/hexanes;  $R_f = 0.4$ ) to afford a colorless solid; mp =

156–158 °C;  $^1\text{H}$  NMR (400 MHz,  $\text{CDCl}_3$ )  $\delta$  7.64 – 7.57 (m, 6H), 7.58 – 7.53 (m, 1H), 7.44 (t,  $J = 7.5$  Hz, 2H), 7.40 – 7.31 (m, 1H), 7.30 – 7.19 (m, 3H), 6.94 (s, 2H), 3.41 (s, 2H), 1.55 (s, 3H);  $^{13}\text{C}$  NMR (101 MHz,  $\text{CDCl}_3$ )  $\delta$  141.4, 141.3, 140.5, 135.8, 132.9, 132.2, 131.2, 130.3, 129.0, 128.0, 127.9, 127.8, 127.2, 127.2, 124.4, 122.1, 114.4, 94.8, 88.9, 63.2, 39.6, 19.7; HRMS (ESI) calcd for  $\text{C}_{29}\text{H}_{21}\text{N}_2$   $[\text{M}+\text{H}]^+$ : 397.1692; found: 397.1699.

**2-Methyl-2-(2-((4-phenoxyphenyl)ethynyl)benzyl)cyclopenta-3,5-diene-1,3-dicarbonitrile (1l):**

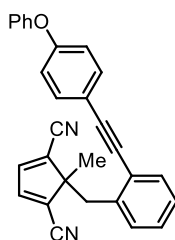

Prepared according to the general procedure-A as described above in 90% yield (152 mg). It was purified by flash chromatography (10% EtOAc/hexanes;  $R_f = 0.3$ ) to afford a colorless solid; mp = 151–153 °C;  $^1\text{H}$  NMR (400 MHz,  $\text{CDCl}_3$ )  $\delta$  7.45 (dd,  $J = 8.4, 4.5$  Hz, 3H), 7.34 – 7.21 (m, 2H), 7.20 – 7.11 (m, 3H), 7.07 (t,  $J = 7.4$  Hz, 1H), 6.97 (d,  $J = 7.7$  Hz, 2H), 6.90 (d,  $J = 8.7$  Hz, 2H), 6.87 (s, 2H), 3.33 (s, 2H), 1.48 (s, 3H);  $^{13}\text{C}$  NMR (101 MHz,  $\text{CDCl}_3$ )  $\delta$  158.0, 156.4, 141.4, 135.6, 133.4, 132.8, 131.1, 130.3, 130.0, 127.9, 127.8, 124.4, 124.1, 119.7, 118.4, 117.7, 114.4, 94.5, 87.5, 63.1, 39.6, 19.7; HRMS (ESI) calcd for  $\text{C}_{29}\text{H}_{21}\text{N}_2\text{O}$   $[\text{M}+\text{H}]^+$ : 413.1634; found: 413.1648.

**2-Methyl-2-(2-((4-(trifluoromethyl)phenyl)ethynyl)benzyl)cyclopenta-3,5-diene-1,3-dicarbonitrile (1m):**

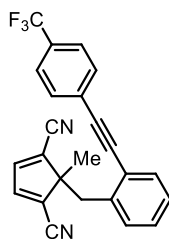

Prepared according to the general procedure-A as described above in 80% yield (127 mg). It was purified by flash chromatography (20% EtOAc/hexanes;  $R_f = 0.3$ ) to afford an orange solid; mp = 172–174 °C;  $^1\text{H}$  NMR (500 MHz,  $\text{CDCl}_3$ )  $\delta$  7.71 (d,  $J = 8.1$  Hz, 2H), 7.65 (d,  $J = 8.2$  Hz, 2H), 7.61 – 7.53 (m, 1H), 7.37 – 7.23 (m, 3H), 6.98 (s, 2H), 3.47 (s, 2H), 1.59 (s, 3H);  $^{13}\text{C}$  NMR (101 MHz,  $\text{CDCl}_3$ )  $\delta$  141.6, 135.9, 133.2, 132.0, 131.0, 130.3, 130.2 (q,  $J_{\text{CF}} = 32.6$  Hz), 128.6, 127.9, 127.0, 125.4 (q,  $J_{\text{CF}} = 3.7$  Hz), 124.1 (q,  $J_{\text{CF}} = 272.4$  Hz), 123.5, 114.4, 93.3, 90.4, 63.2, 39.5, 19.9;  $^{19}\text{F}$  NMR (377 MHz,  $\text{CDCl}_3$ )  $\delta$  -62.81; HRMS (ESI) calcd for  $\text{C}_{24}\text{H}_{16}\text{F}_3\text{N}_2$   $[\text{M}+\text{H}]^+$ : 389.1249; found: 389.1260.

**Methyl 4-((2-((2,5-dicyano-1-methylcyclopenta-2,4-dien-1-yl)methyl)phenyl)ethynyl)benzoate (1n):**

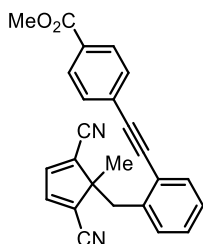

Prepared according to the general procedure-A as described above in 75% yield (116 mg). It was purified by flash chromatography (10% EtOAc/hexanes;  $R_f = 0.3$ ) to afford a colorless solid; mp = 176–178 °C;  $^1\text{H NMR}$  (400 MHz,  $\text{CDCl}_3$ )  $\delta$  8.05 (d,  $J = 8.2$  Hz, 2H), 7.64 (d,  $J = 8.2$  Hz, 2H), 7.60 – 7.53 (m, 1H), 7.35 – 7.24 (m, 3H), 6.97 (s, 2H), 3.94 (s, 3H), 3.44 (s, 2H), 1.58 (s, 3H);  $^{13}\text{C NMR}$  (126 MHz,  $\text{CDCl}_3$ )  $\delta$  166.7, 141.5, 136.0, 133.1, 131.7, 131.0, 130.3, 129.8, 129.7, 128.5, 127.9, 123.7, 114.3, 94.0, 91.0, 63.1, 52.4, 39.5, 19.8; HRMS (ESI) calcd for  $\text{C}_{25}\text{H}_{19}\text{N}_2\text{O}_2$   $[\text{M}+\text{H}]^+$ : 379.1432; found: 379.1441.

**2-(2-((4-Cyanophenyl)ethynyl)benzyl)-2-methylcyclopenta-3,5-diene-1,3-dicarbonitrile (1o):**

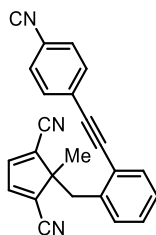

Prepared according to the general procedure-A as described above in 78% yield (110 mg). It was purified by flash chromatography (10% EtOAc/hexanes;  $R_f = 0.3$ ) to afford a colorless solid; mp = 163–165 °C;  $^1\text{H NMR}$  (400 MHz,  $\text{CDCl}_3$ )  $\delta$  7.69 (m, 4H), 7.63 – 7.52 (m, 1H), 7.38 – 7.19 (m, 3H), 6.97 (s, 2H), 3.46 (s, 2H), 1.59 (s, 3H);  $^{13}\text{C NMR}$  (101 MHz,  $\text{CDCl}_3$ )  $\delta$  141.7, 136.0, 133.2, 132.3, 132.2, 130.9, 130.3, 128.8, 128.1, 127.9, 123.2, 118.7, 114.4, 111.9, 93.0, 92.3, 63.2, 39.5, 20.1; HRMS (ESI) calcd for  $\text{C}_{24}\text{H}_{14}\text{N}_3$   $[\text{M}-\text{H}]^-$ : 344.1193; found: 344.1193.

**2-(2-((3-Chlorophenyl)ethynyl)benzyl)-2-methylcyclopenta-3,5-diene-1,3-dicarbonitrile (1p):**

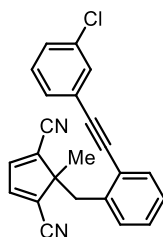

Prepared according to the general procedure-A as described above in 87% yield (131 mg). It was purified by flash chromatography (10% EtOAc/hexanes;  $R_f = 0.3$ ) to afford a colorless solid; mp = 143–145 °C;  $^1\text{H NMR}$  (400 MHz,  $\text{CDCl}_3$ )  $\delta$  7.50 – 7.38 (m, 3H), 7.32 – 7.24 (m, 2H), 7.19 – 7.15 (m, 3H), 6.87 (s, 2H), 3.34 (s, 2H), 1.48 (s, 3H);  $^{13}\text{C NMR}$  (101 MHz,  $\text{CDCl}_3$ )  $\delta$  141.5, 135.7, 134.7, 133.0, 132.9, 131.0, 130.3, 128.9, 128.2, 127.8, 123.9, 121.7, 114.4, 93.7, 89.0, 63.1, 39.5, 19.8; HRMS (ESI) calcd for  $\text{C}_{23}\text{H}_{16}\text{ClN}_2$   $[\text{M}+\text{H}]^+$ : 355.0998; found: 355.0996.

**2-Methyl-2-(2-(m-tolylethynyl)benzyl)cyclopenta-3,5-diene-1,3-dicarbonitrile (1q):**

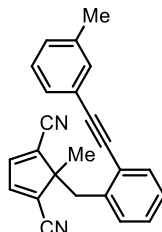

Prepared according to the general procedure-A as described above in 85% yield (116 mg). It was purified by flash chromatography (10% EtOAc/hexanes;  $R_f = 0.4$ ) to afford a brown solid; mp = 154–156 °C;  $^1\text{H NMR}$  (400 MHz,  $\text{CDCl}_3$ )  $\delta$  7.64 – 7.51 (m, 1H), 7.46 – 7.35 (m, 2H), 7.28 (d,  $J = 4.4$  Hz, 4H), 7.19 (d,  $J = 6.6$  Hz, 1H), 6.98 (s, 2H), 3.43 (s, 2H), 2.39 (s, 3H), 1.58 (s, 3H);  $^{13}\text{C NMR}$  (101 MHz,  $\text{CDCl}_3$ )  $\delta$  141.3, 138.2, 135.7, 132.9, 132.3, 131.2, 130.3, 129.5, 128.8, 128.4, 127.9, 127.8, 124.5, 123.0, 114.3, 95.1, 87.8, 63.1, 39.6, 21.4, 19.6; HRMS (ESI) calcd for  $\text{C}_{24}\text{H}_{19}\text{N}_2$   $[\text{M}+\text{H}]^+$ : 335.1544; found: 335.1542.

**2-(2-((3,4-Dichlorophenyl)ethynyl)benzyl)-2-methylcyclopenta-3,5-diene-1,3-dicarbonitrile (1r):**

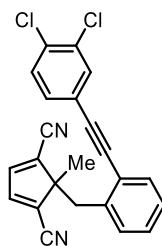

Prepared according to the general procedure-A as described above in 85% yield (135 mg). It was purified by flash chromatography (10% EtOAc/hexanes;  $R_f = 0.3$ ) to afford a colorless solid; mp = 146–148 °C;  $^1\text{H NMR}$  (400 MHz,  $\text{CDCl}_3$ )  $\delta$  7.57 (d,  $J = 1.7$  Hz, 1H), 7.49 – 7.42 (m, 1H), 7.36 – 7.28 (m, 2H), 7.20 – 7.15 (m, 3H), 6.87 (s, 2H), 3.34 (s, 2H), 1.49 (s, 3H);  $^{13}\text{C NMR}$  (101 MHz,  $\text{CDCl}_3$ )  $\delta$  141.5, 135.9, 133.4, 133.1, 133.0, 132.7, 130.9, 130.6, 130.3, 128.5, 127.9, 123.5, 123.2, 114.4, 92.4, 90.0, 63.2, 39.5, 20.0; HRMS (ESI) calcd for  $\text{C}_{23}\text{H}_{13}\text{N}_2\text{Cl}_2$   $[\text{M}-\text{H}]^-$ : 387.0474; found: 387.0461.

**2-(2-((4-Bromo-3-chlorophenyl)ethynyl)benzyl)-2-methylcyclopenta-3,5-diene-1,3-dicarbonitrile (1s):**

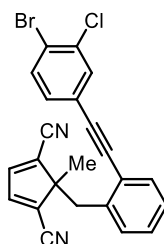

Prepared according to the general procedure-A as described above in 87% yield (154 mg). It was purified by flash chromatography (10% EtOAc/hexanes;  $R_f = 0.3$ ) to afford a colorless solid; mp = 173–175 °C;  $^1\text{H}$  NMR (400 MHz,  $\text{CDCl}_3$ )  $\delta$  7.57 (d,  $J = 1.9$  Hz, 1H), 7.53 (d,  $J = 8.3$  Hz, 1H), 7.47 – 7.43 (m, 1H), 7.25 (dd,  $J = 8.3, 1.9$  Hz, 1H), 7.20 – 7.15 (m, 3H), 6.87 (s, 2H), 3.34 (s, 2H), 1.49 (s, 3H);  $^{13}\text{C}$  NMR (101 MHz,  $\text{CDCl}_3$ )  $\delta$  141.5, 135.9, 134.6, 133.8, 133.2, 133.0, 130.98, 131.0, 130.3, 128.5, 127.9, 123.9, 123.4, 123.0, 114.4, 92.5, 90.1, 63.2, 39.5, 19.9; HRMS (ESI) calcd for  $\text{C}_{23}\text{H}_{13}\text{BrClN}_2$   $[\text{M}-\text{H}]^-$ : 430.9969; found: 430.9956.

**2-Methyl-2-(5-methyl-2-(phenylethynyl)benzyl)cyclopenta-3,5-diene-1,3-dicarbonitrile (1t):**

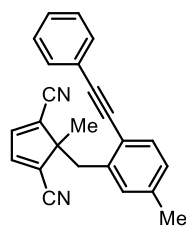

Prepared according to the general procedure-B as described above in 82% yield (92 mg). It was purified by flash chromatography (10% EtOAc/hexanes;  $R_f = 0.3$ ) to afford a colorless solid; mp = 142–144 °C;  $^1\text{H}$  NMR (300 MHz,  $\text{CDCl}_3$ )  $\delta$  7.57 – 7.52 (m, 2H), 7.45 (d,  $J = 7.8$  Hz, 1H), 7.40 – 7.31 (m, 3H), 7.15 – 7.01 (m, 2H), 6.97 (s, 2H), 3.34 (s, 2H), 2.36 (s, 3H), 1.54 (s, 3H);  $^{13}\text{C}$  NMR (101 MHz,  $\text{CDCl}_3$ )  $\delta$  141.2, 138.2, 135.6, 132.7, 131.6, 131.3, 131.3, 128.7, 128.5, 128.4, 123.4, 121.4, 114.3, 94.1, 88.4, 63.0, 39.5, 21.6, 19.3; HRMS (ESI) calcd for  $\text{C}_{24}\text{H}_{19}\text{N}_2$   $[\text{M}+\text{H}]^+$ : 335.1545; found: 335.1543.

**2-Methyl-2-(2-(p-tolyethynyl)benzyl)cyclopenta-3,5-diene-1,3-dicarbonitrile (1u):**

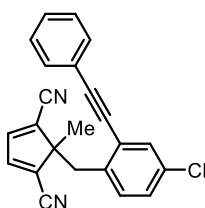



Prepared according to the general procedure-B as described above in 90% yield (107 mg). It was purified by flash chromatography (10% EtOAc/hexanes;  $R_f = 0.4$ ) to afford a yellow solid; mp = 137–139 °C;  $^1\text{H NMR}$  (300 MHz,  $\text{CDCl}_3$ )  $\delta$  7.59 – 7.55 (m, 2H), 7.51 (d,  $J = 8.3$  Hz, 1H), 7.42 – 7.36 (m, 3H), 7.32 – 7.21 (m, 2H), 7.02 (s, 2H), 3.39 (s, 2H), 1.58 (s, 3H);  $^{13}\text{C NMR}$  (101 MHz,  $\text{CDCl}_3$ )  $\delta$  141.5, 137.4, 133.9, 133.9, 131.7, 130.9, 130.3, 128.9, 128.6, 128.2, 122.9, 122.9, 114.1, 95.8, 87.11, 62.7, 39.2, 19.6; HRMS (ESI) calcd for  $\text{C}_{23}\text{H}_{16}\text{N}_2\text{Cl}$   $[\text{M}+\text{H}]^+$ : 355.0998; found: 355.0996.

**2-(2-Bromobenzyl)-2-methylcyclopenta-3,5-diene-1,3-dicarbonitrile (1v):**

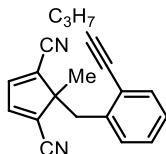

Prepared according to the general procedure-B as described above in 85% yield (82 mg). It was purified by flash chromatography (5% EtOAc/hexanes;  $R_f = 0.3$ ) to afford a brown solid; mp = 125–127 °C;  $^1\text{H NMR}$  (400 MHz,  $\text{CDCl}_3$ )  $\delta$  7.34 – 7.26 (m, 1H), 7.15 – 7.04 (m, 3H), 6.83 (s, 2H), 3.31 (s, 2H), 2.39 (t,  $J = 7.1$  Hz, 2H), 1.59 (ddd,  $J = 12.4, 8.3, 6.2$  Hz, 2H), 1.48 (s, 3H), 0.99 (t,  $J = 7.4$  Hz, 3H);  $^{13}\text{C NMR}$  (101 MHz,  $\text{CDCl}_3$ )  $\delta$  141.5, 135.6, 132.8, 131.0, 130.1, 127.5, 127.1, 124.9, 114.5, 96.4, 79.4, 63.3, 39.6, 22.1, 22.0, 20.1, 13.9; HRMS (ESI) calcd for  $\text{C}_{20}\text{H}_{19}\text{N}_2$   $[\text{M}+\text{H}]^+$ : 287.1544; found: 287.1543.

**Procedure for the synthesis of 1,3-diynes **S7**:<sup>3</sup>**

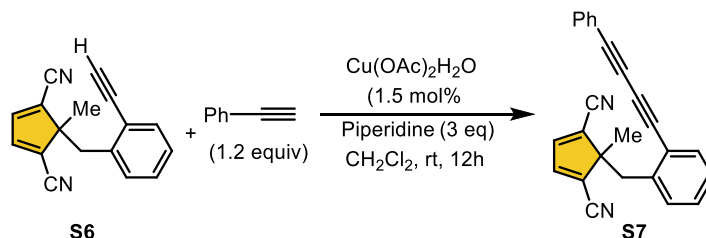

A mixture of cyclopentane-1,3-dicarbonitrile alkyne **S6** (0.8 mmol), phenylacetylene (1.6 mmol), piperidine (2.4 mmol), and  $\text{Cu}(\text{OAc})_2 \cdot \text{H}_2\text{O}$  (10 mol%) in  $\text{CH}_2\text{Cl}_2$  (0.4 M, 2 mL) was stirred under open air atmosphere at 25 °C for 4 h. After completion of reaction (monitored by TLC), the mixture was concentrated in vacuo and the residue was purified by flash column chromatography (5% EtOAc/hexanes;  $R_f = 0.3$ ) on silica gel to afford a brown solid 1,3-diyne **S7** in 88% yield (248 mg); mp = 125–127 °C.  $^1\text{H NMR}$  (500 MHz,  $\text{CDCl}_3$ )  $\delta$  7.51 – 7.39 (m, 3H), 7.35 – 7.25 (m, 3H), 7.23 – 7.13 (m, 3H), 6.89 (s, 2H), 3.30 (s, 2H), 1.49 (s, 3H);  $^{13}\text{C NMR}$  (101 MHz,  $\text{CDCl}_3$ )  $\delta$  141.6, 137.3, 133.9, 132.7, 130.9, 130.5, 129.4, 128.9, 128.5, 127.9, 122.9, 121.8, 114.3, 83.3, 79.9, 79.6, 74.1, 63.0, 39.6, 19.9; HRMS (ESI) calcd for  $\text{C}_{25}\text{H}_{17}\text{N}_2$   $[\text{M}+\text{H}]^+$ : 345.1392; found: 345.1382.

### Procedure for the synthesis of 1,3-diamide **S8**:<sup>5</sup>

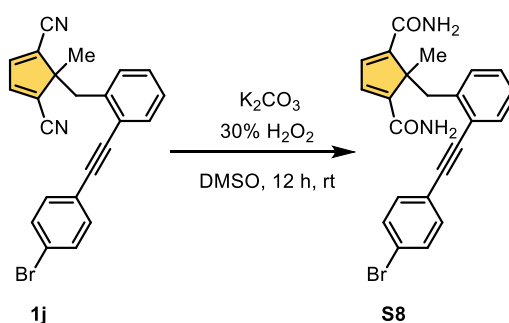

To a solution of compound **1j** (0.50 mmol, 1 equiv) in DMSO (3 mL) was added  $K_2CO_3$  (139 mg, 2.0 equiv) and 30%  $H_2O_2$  (0.5 mL, 10 equiv). The reaction mixture was allowed to stir at room temperature for 12 h and quenched with saturated aqueous  $NaHCO_3$  (20 mL). The reaction mixture was extracted with EtOAc (2 x 20 mL), dried combined organic layer over  $Na_2SO_4$  and evaporated *in vacuo*. The residue was purified by flash column chromatography (60% EtOAc/hexanes;  $R_f = 0.4$ ) on silica gel to afford a colorless solid 1,3-diamine **S8** in 85% yield (185 mg); mp = 200–203 °C. <sup>1</sup>H NMR (400 MHz, DMSO)  $\delta$  7.70 – 7.65 (m, 2H), 7.63 – 7.59 (m, 2H), 7.43 (s, 2H), 7.35 – 7.32 (m, 1H), 7.11 – 7.08 (m, 2H), 6.97 – 6.96 (m, 1H), 6.95 (s, 2H), 6.83 (s, 2H), 3.73 (s, 2H), 1.63 (s, 3H); <sup>13</sup>C NMR (101 MHz, DMSO)  $\delta$  165.3, 151.4, 140.2, 133.5, 132.0, 131.5, 128.7, 127.5, 126.0, 122.5, 122.2, 121.7, 91.5, 89.7, 58.8, 37.8, 23.0; HRMS (ESI) calcd for  $C_{23}H_{20}O_2N_2Br$   $[M+H]^+$ : 435.0694; found: 435.0702.

### Procedure for the synthesis of Ethyl 1-(2-Bromobenzyl)-2-oxocyclopentane-1-carboxylate:<sup>6</sup>

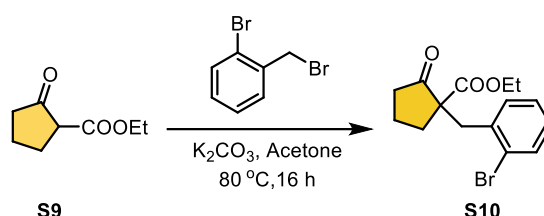

To a vigorously stirred suspension of ethyl 2-oxocyclopentane-1-carboxylate **S9** (1 equiv) in acetone (1.0 M), was gradually added  $K_2CO_3$  (1 equiv) and stirred for additional 30 minutes. Then benzyl bromide (1.2 equiv) was added to the reaction mixture and stirred at 80 °C in preheated oil bath for 16 h. Later, the reaction mixture was concentrated and extracted with  $CH_2Cl_2$  (2 times) and the combined organic solvent was washed with 5%  $NH_4Cl$  aqueous solution and dried over anhydrous  $Na_2SO_4$  and concentrated *in vacuo*. The obtained crude residue was purified by flash column chromatography (hexane/EtOAc).

**Procedure for the synthesis of Ethyl 1-(2-Bromobenzyl)-2-cyano-2-hydroxycyclopentane-1-carboxylate:<sup>2</sup>**

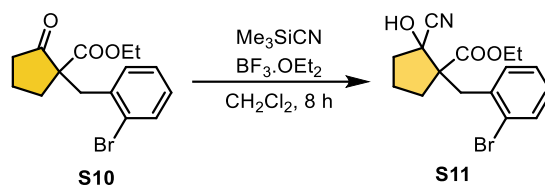

$\text{Me}_3\text{SiCN}$  (1.5 equiv) and  $\text{BF}_3 \cdot \text{OEt}_2$  (1.5 equiv) were added dropwise consecutively to a stirred solution of **S11** (1 equiv) in dry  $\text{CH}_2\text{Cl}_2$  (0.3 M) under nitrogen atmosphere. The resulting mixture was heated at reflux using preheated oil bath for 8 h, the reaction was quenched at 0 °C by adding aqueous hydrochloric acid (1.0 M). The organic layer was collected and the aqueous layer was extracted with  $\text{CH}_2\text{Cl}_2$  (two times). The combined organic layers were washed with brine, and dried over anhydrous  $\text{Na}_2\text{SO}_4$ . After removal of the solvent,  $\text{Na}_2\text{SO}_4$  and concentrated in *vacuo*. The obtained crude residue was purified by flash column chromatography (20% EtOAc/hexanes;  $R_f = 0.4$ ) on silica gel to afford a colorless oil **S12** in 85% yield (460 mg).  $^1\text{H}$  NMR (400 MHz,  $\text{CDCl}_3$ )  $\delta$  7.49 (dd,  $J = 7.9, 0.7$  Hz, 1H), 7.21 – 7.13 (m, 1H), 7.11 – 6.99 (m, 2H), 4.25 – 3.98 (m, 2H), 3.70 (s, 1H), 3.47 (d,  $J = 13.9$  Hz, 1H), 2.99 (d,  $J = 13.9$  Hz, 1H), 2.51 – 2.36 (m, 1H), 2.21 – 2.08 (m, 2H), 2.03 – 1.81 (m, 3H), 1.10 (t,  $J = 7.2$  Hz, 3H);  $^{13}\text{C}$  NMR (101 MHz,  $\text{CDCl}_3$ )  $\delta$  173.3, 135.9, 133.2, 131.5, 128.9, 127.5, 126.1, 119.7, 78.8, 63.0, 62.0, 39.0, 37.9, 28.3, 20.1, 13.9; HRMS (ESI) calcd for  $\text{C}_{16}\text{H}_{19}\text{O}_3\text{NBr}$   $[\text{M}+\text{H}]^+$ : 352.0535; found: 352.0542.

**General procedure for the synthesis of Ethyl 1-(2-Bromobenzyl)-2-cyanocyclopent-2-ene-1-carboxylate:<sup>2</sup>**

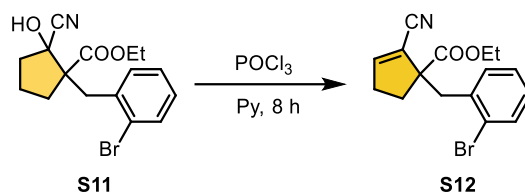

Compounds **S12** (1 equiv) were dissolved in pyridine (0.5 M) followed by the addition of  $\text{POCl}_3$  (2.5 equiv) under nitrogen atmosphere. After heating at 60 °C for 3 h, the reaction mixture was cooled to 0 °C and  $\text{CH}_2\text{Cl}_2$  was added. Then, the mixture was poured into hydrochloric acid (2 M) slowly. After filtration through a pad of Celite, the filtration cake was washed with  $\text{CH}_2\text{Cl}_2$  and the filtrate was moved into a separating funnel. The organic layer was collected, and the aqueous layer was extracted with  $\text{CH}_2\text{Cl}_2$ . The combined organic layers were washed with a saturated solution of sodium bicarbonate and brine, and dried over anhydrous  $\text{Na}_2\text{SO}_4$ . After removal of the organic solvent, the

residue was purified by flash column chromatography (5% EtOAc/hexanes;  $R_f = 0.4$ ) on silica gel to afford a colorless oil **S13** in 80% yield (348 mg).  $^1\text{H}$  NMR (300 MHz,  $\text{CDCl}_3$ )  $\delta$  7.49 (d,  $J = 7.6$  Hz, 1H), 7.22 – 7.14 (m, 2H), 7.07 – 7.02 (m, 1H), 6.67 (t,  $J = 2.6$  Hz, 1H), 4.20 (q,  $J = 7.1$  Hz, 2H), 3.55 (d,  $J = 14.2$  Hz, 1H), 3.18 (d,  $J = 14.2$  Hz, 1H), 2.54 – 2.29 (m, 2H), 2.19 – 1.99 (m, 2H), 1.26 (t,  $J = 7.1$  Hz, 3H);  $^{13}\text{C}$  NMR (126 MHz,  $\text{CDCl}_3$ )  $\delta$  173.1, 152.2, 135.9, 133.3, 131.6, 128.9, 127.6, 126.3, 118.3, 115.7, 62.0, 39.8, 32.5, 31.7, 14.2; HRMS (ESI) calcd for  $\text{C}_{16}\text{H}_{17}\text{O}_2\text{NBr}$   $[\text{M}+\text{H}]^+$ : 334.0432; found: 334.0437.

### Sonogashira coupling of Ethyl 2-cyano-1-(2-(Phenylethynyl)benzyl)cyclopent-2-ene-1-carboxylate:<sup>3</sup>

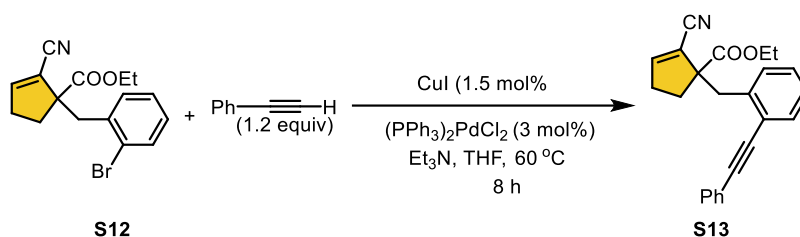

To a solution of **S13** (1 equiv) in anhydrous THF (0.5 M), was added  $\text{Pd}(\text{PPh}_3)_2\text{Cl}_2$  (2 mol%),  $\text{CuI}$  (5 mol%),  $\text{Et}_3\text{N}$  (1.7 equiv) and phenyl acetylene (1.3 equiv). The mixture was stirred at 60 °C for 8 h. The reaction was cooled to room temperature, diluted with water, and the mixture was extracted with EtOAc. The combined organic phase was dried over anhydrous  $\text{Na}_2\text{SO}_4$ , and concentrated in *vacuo*. The obtained crude residue was purified by flash chromatography flash column chromatography (5% EtOAc/hexanes;  $R_f = 0.5$ ) on silica gel to afford a colorless oil **S14** in 88% yield (280 mg).  $^1\text{H}$  NMR (300 MHz,  $\text{CDCl}_3$ )  $\delta$  7.51 – 7.46 (m, 3H), 7.34 – 7.26 (m, 3H), 7.22 – 7.14 (m, 3H), 6.63 (t,  $J = 1.9$  Hz, 1H), 4.19 (q,  $J = 7.1$  Hz, 2H), 3.73 (d,  $J = 13.7$  Hz, 1H), 3.18 (d,  $J = 13.7$  Hz, 1H), 2.41 – 2.25 (m, 3H), 2.09 – 1.91 (m, 1H), 1.24 (t,  $J = 7.1$  Hz, 3H);  $^{13}\text{C}$  NMR (101 MHz,  $\text{CDCl}_3$ )  $\delta$  173.3, 151.9, 137.9, 132.5, 131.6, 130.4, 128.6, 128.5, 127.2, 124.6, 123.2, 118.3, 116.0, 93.8, 88.5, 62.5, 61.9, 38.8, 32.5, 31.6, 14.2; HRMS (ESI) calcd for  $\text{C}_{24}\text{H}_{22}\text{NO}_2$   $[\text{M}+\text{H}]^+$ : 356.1640; found: 356.1645.

## IIIB. Experimental procedure & analytical data of products:

### General procedure for Ag(I)-catalyzed stereoselective cyclopropanation:

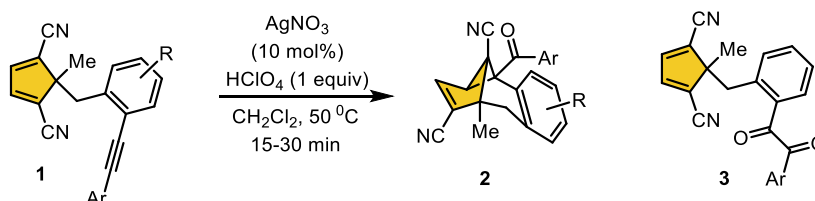

A dried screw-cap vial was charged with cyclopentene dinitrile alkynes **1** (0.2 mmol, 1.0 equiv), and AgNO<sub>3</sub> (3.4 mg, 10.0 mol%) in CH<sub>2</sub>Cl<sub>2</sub> (2 mL, 0.1 M) was added HClO<sub>4</sub> (18 μL, ~70% aqueous solution, 1.0 equiv). The reaction mixture was stirred at 50 °C in oil bath for 15-30 minutes (monitored by TLC). Then, it was cooled to room temperature and quenched with aqueous NaHCO<sub>3</sub> (5 mL) solution. The mixture was extracted with CH<sub>2</sub>Cl<sub>2</sub> (3 x 5 mL) and combined organic solvent was concentrated under reduced pressure. The residue was purified by flash column chromatography on silica gel (hexanes/ethyl acetate) to afford the desired product **2** along with trace amount of uncyclized 1,3-dicarbonyl product **3**. [Note: For small scale reaction, we didn't observe any problem with aq. HClO<sub>4</sub>. However, for large scale, it recommends to perform the reaction in the presence of laboratory protective shield].

**7b-Benzoyl-2a1-isocyano-2a-methyl-2a,2a1,7b,7c-tetrahydro-3H benzo[f]cyclopropa[cd]indene-2-carbonitrile (2a):**

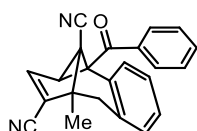

Prepared according to the general procedure as described above in 72% yield (48 mg). It was purified by flash chromatography (10% EtOAc/hexanes; R<sub>f</sub> = 0.3) to afford a colorless solid; mp = 218–220 °C; <sup>1</sup>H NMR (400 MHz, CDCl<sub>3</sub>) δ 7.71 – 7.59 (m, 2H), 7.48-7.45 (m, 1H), 7.34-7.31 (m, 2H), 7.24-7.19 (m, 2H), 7.07 (t, J = 7.4 Hz, 1H), 6.96 (d, J = 7.5 Hz, 1H), 6.34 (d, J = 2.6 Hz, 1H), 3.99 (d, J = 2.6 Hz, 1H), 3.41 (d, J = 16.2 Hz, 1H), 2.93 (d, J = 16.2 Hz, 1H), 1.74 (s, 3H); <sup>13</sup>C NMR (101 MHz, CDCl<sub>3</sub>) δ 193.2, 142.2, 134.7, 133.8, 133.8, 129.5, 129.4, 129.1, 129.1, 128.8, 128.3, 128.0, 124.3, 115.2, 113.3, 52.4, 47.3, 43.5, 37.5, 33.4, 23.3; HRMS (ESI) calcd for C<sub>23</sub>H<sub>17</sub>N<sub>2</sub>O [M+H]<sup>+</sup>: 337.1341; found: 337.1294.

**2-Methyl-2-(2-(2-oxo-2-phenylacetyl)benzyl)cyclopenta-3,5-diene-1,3-dicarbonitrile (3a):**

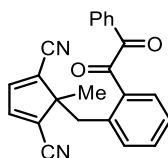

Prepared according to the general procedure as described above in 7% yield (5 mg). It was purified by flash chromatography (10% EtOAc/hexanes; R<sub>f</sub> = 0.5) to afford a yellow oil; <sup>1</sup>H NMR (400 MHz, CDCl<sub>3</sub>) δ 8.16 – 7.89 (m, 1H), 7.75 – 7.64 (m, 2H), 7.59 – 7.47 (m, 3H), 7.43 – 7.34 (m, 2H), 7.27 – 7.06 (m, 1H), 7.01 (s, 2H), 3.75 (s, 2H), 1.56 (s, 3H); <sup>13</sup>C NMR (101 MHz, CDCl<sub>3</sub>) δ 196.3, 194.2,

141.6, 137.2, 135.0, 133.7, 133.6, 133.4, 133.3, 133.0, 131.0, 130.2, 129.2, 128.1, 114.4, 62.7, 37.2, 20.1; HRMS (ESI) calcd for C<sub>23</sub>H<sub>17</sub>N<sub>2</sub>O<sub>2</sub> [M+H]<sup>+</sup>: 353.1278; found: 353.1284.

**2a<sup>1</sup>-Isocyano-2a-methyl-7b-(4-methylbenzoyl)-2a,2a<sup>1</sup>,7b,7c-tetrahydro-3H-benzo[*f*]cyclopropa[*cd*]indene-2-carbonitrile (2b):**

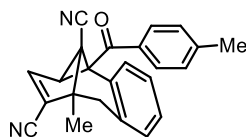

Prepared according to the general procedure as described above in 64% yield (47 mg). It was purified by flash chromatography (10% EtOAc/hexanes; R<sub>f</sub> = 0.3) to afford a colorless solid; mp = 211–213 °C; <sup>1</sup>H NMR (400 MHz, CDCl<sub>3</sub>) δ 7.58 (d, *J* = 8.2 Hz, 2H), 7.25 – 7.18 (m, 2H), 7.16 – 7.03 (m, 3H), 6.98 (d, *J* = 7.5 Hz, 1H), 6.33 (d, *J* = 2.6 Hz, 1H), 3.96 (d, *J* = 2.6 Hz, 1H), 3.40 (d, *J* = 16.2 Hz, 1H), 2.92 (d, *J* = 16.2 Hz, 1H), 2.32 (s, 3H), 1.73 (s, 3H); <sup>13</sup>C NMR (126 MHz, CDCl<sub>3</sub>) δ 192.6, 144.9, 142.3, 133.8, 132.0, 129.7, 129.5, 129.1, 129.0, 128.3, 128.2, 124.2, 115.3, 113.3, 52.4, 47.4, 43.5, 37.6, 33.3, 23.4, 21.9; HRMS (ESI) calcd for C<sub>24</sub>H<sub>19</sub>N<sub>2</sub>O [M+H]<sup>+</sup>: 351.1497; found: 351.1504.

**4-(*tert*-Butyl)benzoyl)-2a<sup>1</sup>-isocyano-2a-methyl-2a,2a<sup>1</sup>,7b,7c-tetrahydro-3H-benzo[*f*]cyclopropa[*cd*]indene-2-carbonitrile (2c):**

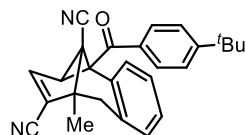

Prepared according to the general procedure as described above in 75% yield (61 mg). It was purified by flash chromatography (10% EtOAc/hexanes; R<sub>f</sub> = 0.3) to afford a colorless solid; mp = 202–204 °C; <sup>1</sup>H NMR (400 MHz, CDCl<sub>3</sub>) δ 7.62 (d, *J* = 8.5 Hz, 2H), 7.33 (d, *J* = 8.5 Hz, 2H), 7.27 – 7.17 (m, 2H), 7.09 (t, *J* = 7.3 Hz, 1H), 7.00 (d, *J* = 7.6 Hz, 1H), 6.33 (d, *J* = 2.5 Hz, 1H), 3.96 (d, *J* = 2.5 Hz, 1H), 3.41 (d, *J* = 16.1 Hz, 1H), 2.92 (d, *J* = 16.1 Hz, 1H), 1.73 (s, 3H), 1.26 (s, 9H); <sup>13</sup>C NMR (101 MHz, CDCl<sub>3</sub>) δ 192.5, 157.7, 142.3, 133.8, 131.8, 129.6, 129.4, 129.1, 129.0, 128.3, 128.2, 125.8, 124.2, 115.3, 113.3, 52.4, 47.4, 43.5, 37.6, 35.3, 33.2, 31.1, 23.3; HRMS (ESI) calcd for C<sub>27</sub>H<sub>25</sub>N<sub>2</sub>O [M+H]<sup>+</sup>: 393.1967; found: 393.1970.

**2a<sup>1</sup>-Isocyano-7b-(4-methoxybenzoyl)-2a-methyl-2a,2a<sup>1</sup>,7b,7c-tetrahydro-3H-benzo[*f*]cyclopropa[*cd*]indene-2-carbonitrile (2d):**

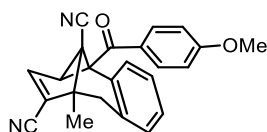

Prepared according to the general procedure as described above in 74% yield (56 mg). It was purified by flash chromatography (10% EtOAc/hexanes;  $R_f = 0.3$ ) to afford a colorless solid; mp = 230–232 °C;  $^1\text{H NMR}$  (400 MHz,  $\text{CDCl}_3$ )  $\delta$  7.71 – 7.56 (m, 2H), 7.25 – 7.18 (m, 2H), 7.11 – 7.07 (m, 1H), 7.01 (d,  $J = 7.6$  Hz, 1H), 6.84 – 6.75 (m, 2H), 6.34 (d,  $J = 2.6$  Hz, 1H), 3.95 (d,  $J = 2.6$  Hz, 1H), 3.80 (s, 3H), 3.38 (d,  $J = 16.2$  Hz, 1H), 2.92 (d,  $J = 16.2$  Hz, 1H), 1.72 (s, 3H);  $^{13}\text{C NMR}$  (126 MHz,  $\text{CDCl}_3$ )  $\delta$  191.3, 164.0, 142.4, 133.7, 132.1, 129.4, 129.1, 129.0, 128.4, 128.3, 127.3, 124.1, 115.3, 114.1, 113.4, 55.6, 52.4, 47.3, 43.6, 37.6, 33.1, 23.4; HRMS (ESI) calcd for  $\text{C}_{24}\text{H}_{19}\text{N}_2\text{O}_2$   $[\text{M}+\text{H}]^+$ : 367.1447; found: 367.1445.

**4-(Benzyloxy)benzoyl)-2a<sup>1</sup>-isocyano-2a-methyl-2a,2a<sup>1</sup>,7b,7c-tetrahydro-3H-benzo[*f*]cyclopropa[*cd*]indene-2-carbonitrile (2e):**

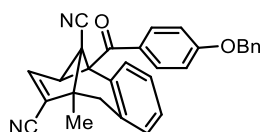

Prepared according to the general procedure as described above in 81% yield (74 mg). It was purified by flash chromatography (10% EtOAc/hexanes;  $R_f = 0.3$ ) to afford a colorless solid; mp = 238–240 °C;  $^1\text{H NMR}$  (400 MHz,  $\text{CDCl}_3$ )  $\delta$  7.56 (d,  $J = 8.9$  Hz, 2H), 7.38 – 7.21 (m, 4H), 7.19 – 7.07 (m, 3H), 7.02 – 6.95 (m, 1H), 6.90 (d,  $J = 7.5$  Hz, 1H), 6.76 (d,  $J = 8.9$  Hz, 2H), 6.22 (d,  $J = 2.6$  Hz, 1H), 4.94 (s, 2H), 3.84 (d,  $J = 2.6$  Hz, 1H), 3.28 (d,  $J = 16.2$  Hz, 1H), 2.81 (d,  $J = 16.2$  Hz, 1H), 1.62 (s, 3H);  $^{13}\text{C NMR}$  (101 MHz,  $\text{CDCl}_3$ )  $\delta$  191.3, 163.2, 142.4, 136.0, 133.7, 132.1, 129.4, 129.1, 129.0, 128.8, 128.5, 128.3, 127.6, 127.5, 124.1, 115.3, 114.9, 113.4, 70.3, 52.4, 47.3, 43.6, 37.6, 33.1, 23.4; HRMS (ESI) calcd for  $\text{C}_{30}\text{H}_{23}\text{N}_2\text{O}_2$   $[\text{M}+\text{H}]^+$ : 443.1760; found: 443.1755.

**4-(Allyloxy)benzoyl)-2a<sup>1</sup>-isocyano-2a-methyl-2a,2a<sup>1</sup>,7b,7c-tetrahydro-3H-benzo[*f*]cyclopropa[*cd*]indene-2-carbonitrile (2f):**

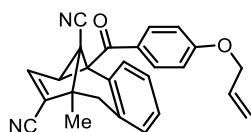

Prepared according to the general procedure as described above in 79% yield (58 mg). It was purified by flash chromatography (10% EtOAc/hexanes;  $R_f = 0.3$ ) to afford a colorless solid; mp = 234–236

°C;  $^1\text{H}$  NMR (400 MHz,  $\text{CDCl}_3$ )  $\delta$  7.65 (d,  $J = 8.9$  Hz, 2H), 7.29 – 7.17 (m, 2H), 7.09 (t,  $J = 7.3$  Hz, 1H), 7.00 (d,  $J = 7.5$  Hz, 1H), 6.80 (d,  $J = 8.9$  Hz, 2H), 6.33 (d,  $J = 2.5$  Hz, 1H), 5.99 (ddd,  $J = 22.5$ , 10.6, 5.3 Hz, 1H), 5.49 – 5.08 (m, 2H), 4.52 (d,  $J = 5.3$  Hz, 2H), 3.95 (d,  $J = 2.5$  Hz, 1H), 3.38 (d,  $J = 16.2$  Hz, 1H), 2.92 (d,  $J = 16.2$  Hz, 1H), 1.72 (s, 3H);  $^{13}\text{C}$  NMR (101 MHz,  $\text{CDCl}_3$ )  $\delta$  191.3, 163.0, 142.4, 133.7, 132.3, 132.1, 129.4, 129.1, 128.0, 128.3, 127.4, 125.5, 125.5, 124.1, 118.5, 115.3, 114.8, 113.4, 69.1, 52.4, 47.3, 43.6, 37.6, 33.1, 23.4; HRMS (ESI) calcd for  $\text{C}_{26}\text{H}_{21}\text{N}_2\text{O}_2$   $[\text{M}+\text{H}]^+$ : 393.1603; found: 393.1595.

**4-((2-Bromoallyl)oxy)benzoyl)-2a<sup>1</sup>-isocyano-2a-methyl-2a,2a<sup>1</sup>,7b,7c-tetrahydro-3H-benzo[*f*]cyclopropa[*cd*]indene-2-carbonitrile (2g):**

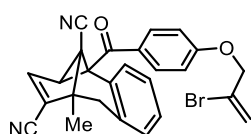

Prepared according to the general procedure as described above in 67% yield (66 mg). It was purified by flash chromatography (20% EtOAc/hexanes;  $R_f = 0.3$ ) to afford a colorless solid; mp = 214–216 °C;  $^1\text{H}$  NMR (400 MHz,  $\text{CDCl}_3$ )  $\delta$  7.66 (d,  $J = 8.9$  Hz, 2H), 7.31 – 7.17 (m, 2H), 7.13 – 7.06 (m, 1H), 7.00 (d,  $J = 7.6$  Hz, 1H), 6.81 (d,  $J = 8.9$  Hz, 2H), 6.33 (d,  $J = 2.6$  Hz, 1H), 5.92 (d,  $J = 2.0$  Hz, 1H), 5.68 – 5.65 (m, 1H), 4.62 (s, 2H), 3.95 (d,  $J = 2.6$  Hz, 1H), 3.38 (d,  $J = 16.2$  Hz, 1H), 2.92 (d,  $J = 16.2$  Hz, 1H), 1.72 (s, 3H);  $^{13}\text{C}$  NMR (101 MHz,  $\text{CDCl}_3$ )  $\delta$  191.3, 162.0, 142.3, 133.7, 132.1, 129.3, 129.2, 129.0, 128.3, 128.2, 128.1, 125.8, 124.1, 118.5, 115.3, 114.9, 113.3, 71.6, 52.4, 47.3, 43.5, 37.5, 33.2, 23.3; HRMS (ESI) calcd for  $\text{C}_{26}\text{H}_{20}\text{BrO}_2\text{N}_2$   $[\text{M}+\text{H}]^+$ : 471.0708; found: 471.0698.

**4-Fluorobenzoyl)-2a<sup>1</sup>-isocyano-2a-methyl-2a,2a<sup>1</sup>,7b,7c-tetrahydro-3H-benzo[*f*]cyclopropa[*cd*]indene-2-carbonitrile (2h):**

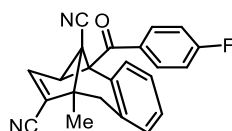

Prepared according to the general procedure as described above in 63% yield (46 mg). It was purified by flash chromatography (10% EtOAc/hexanes;  $R_f = 0.3$ ) to afford a colorless solid; mp = 234–236 °C;  $^1\text{H}$  NMR (400 MHz,  $\text{CDCl}_3$ )  $\delta$  7.67 – 7.58 (m, 2H), 7.25 – 7.10 (m, 2H), 7.04 – 6.99 (m, 1H), 6.97 – 6.85 (m, 3H), 6.26 (d,  $J = 2.5$  Hz, 1H), 3.91 (d,  $J = 2.5$  Hz, 1H), 3.31 (d,  $J = 16.2$  Hz, 1H), 2.86 (d,  $J = 16.3$  Hz, 1H), 1.66 (s, 3H);  $^{13}\text{C}$  NMR (101 MHz,  $\text{CDCl}_3$ )  $\delta$  191.6, 165.9 (d,  $J_{CF} = 256.8$  Hz), 142.1, 133.8, 132.3 (d,  $J_{CF} = 9.6$  Hz), 131.0 (d,  $J_{CF} = 2.9$  Hz), 129.4, 129.3, 128.4, 127.8, 124.3, 116.1 (d,  $J_{CF} = 22.3$  Hz), 115.1, 113.2, 52.4, 47.2, 43.6, 37.5, 33.3, 23.3;  $^{19}\text{F}$  NMR (376 MHz,  $\text{CDCl}_3$ )  $\delta$  -103.00; HRMS (ESI) calcd for  $\text{C}_{23}\text{H}_{16}\text{FN}_2\text{O}$   $[\text{M}+\text{H}]^+$ : 355.1247; found: 355.1287.



**4-Chlorobenzoyl-2a<sup>1</sup>-isocyano-2a-methyl-2a,2a<sup>1</sup>,7b,7c-tetrahydro-3H-benzo[*f*]cyclopropa[*cd*]indene-2-carbonitrile (2i):**

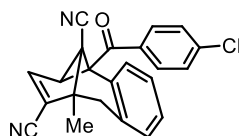

Prepared according to the general procedure as described above in 67% yield (52 mg). It was purified by flash chromatography (10% EtOAc/hexanes;  $R_f = 0.3$ ) to afford a colorless solid; mp = 247–249 °C;  $^1\text{H NMR}$  (400 MHz,  $\text{CDCl}_3$ )  $\delta$  7.69 – 7.57 (m, 2H), 7.42 – 7.21 (m, 4H), 7.17 – 7.07 (m, 1H), 6.97 (d,  $J = 7.7$  Hz, 1H), 6.36 (d,  $J = 2.6$  Hz, 1H), 4.01 (d,  $J = 2.6$  Hz, 1H), 3.40 (d,  $J = 16.2$  Hz, 1H), 2.96 (d,  $J = 16.3$  Hz, 1H), 1.75 (s, 3H);  $^{13}\text{C NMR}$  (101 MHz,  $\text{CDCl}_3$ )  $\delta$  192.0, 142.0, 140.3, 133.8, 133.0, 130.9, 129.4, 129.3, 129.2, 128.4, 127.6, 124.3, 115.0, 113.2, 52.4, 47.2, 43.5, 37.5, 33.4, 23.3; HRMS (ESI) calcd for  $\text{C}_{23}\text{H}_{16}\text{ClN}_2\text{O}$   $[\text{M}+\text{H}]^+$ : 371.0951; found: 371.1016.

**4-Bromobenzoyl-2a<sup>1</sup>-isocyano-2a-methyl-2a,2a<sup>1</sup>,7b,7c-tetrahydro-3H-benzo[*f*]cyclopropa[*cd*]indene-2-carbonitrile (2j):**

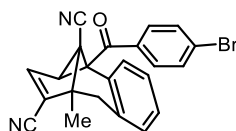

Prepared according to the general procedure as described above in 65% yield (54 mg). It was purified by flash chromatography (10% EtOAc/hexanes;  $R_f = 0.3$ ) to afford a colorless solid; mp = 239–241 °C;  $^1\text{H NMR}$  (400 MHz,  $\text{CDCl}_3$ )  $\delta$  7.58 – 7.39 (m, 4H), 7.28 – 7.20 (m, 2H), 7.12 – 7.04 (m, 1H), 6.94 (d,  $J = 7.6$  Hz, 1H), 6.33 (d,  $J = 2.6$  Hz, 1H), 3.99 (d,  $J = 2.6$  Hz, 1H), 3.37 (d,  $J = 16.3$  Hz, 1H), 2.93 (d,  $J = 16.3$  Hz, 1H), 1.73 (s, 3H);  $^{13}\text{C NMR}$  (101 MHz,  $\text{CDCl}_3$ )  $\delta$  192.3, 142.0, 133.8, 133.4, 132.2, 130.9, 129.4, 129.3, 129.3, 129.2, 128.5, 127.6, 124.3, 115.0, 113.2, 52.4, 47.2, 43.5, 37.5, 33.4, 23.3; HRMS (ESI) calcd for  $\text{C}_{23}\text{H}_{16}\text{BrN}_2\text{O}$   $[\text{M}+\text{H}]^+$ : 415.0446; found: 415.0453.

**2-(2-(2-(4-Bromophenyl)-2-oxoacetyl)benzyl)-2-methylcyclopenta-3,5-diene-1,3-dicarbonitrile (3j):**

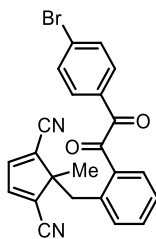

Prepared according to the general procedure as described above in 8% yield (86 mg). It was purified by flash chromatography (10% EtOAc/hexanes;  $R_f = 0.5$ ) to afford a yellow liquid;  $^1\text{H NMR}$  (300

MHz, CDCl<sub>3</sub>)  $\delta$  7.96 – 7.86 (m, 2H), 7.72 – 7.65 (m, 2H), 7.60 – 7.47 (m, 2H), 7.45 – 7.33 (m, 2H), 7.01 (s, 2H), 3.74 (s, 2H), 1.56 (s, 3H); <sup>13</sup>C NMR (151 MHz, CDCl<sub>3</sub>)  $\delta$  195.7, 193.1, 141.7, 137.2, 133.7, 133.6, 132.8, 132.6, 132.0, 131.6, 131.0, 130.7, 128.1, 114.4, 62.7, 37.2, 20.1; HRMS (ESI) calcd for C<sub>23</sub>H<sub>16</sub>BrN<sub>2</sub>O<sub>2</sub> [M+H]<sup>+</sup>: 431.0393; found: 431.0389.

**[1,1'-Biphenyl]-4-carbonyl-2a<sup>1</sup>-isocyano-2a-methyl-2a,2a<sup>1</sup>,7b,7c-tetrahydro-3H-benzo[*f*]cyclopropa[*cd*]indene-2-carbonitrile (2k):**

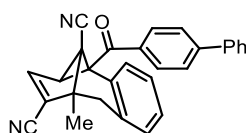

Prepared according to the general procedure as described above in 80% yield (67 mg). It was purified by flash chromatography (10% EtOAc/hexanes; R<sub>f</sub> = 0.3) to afford a colorless solid; mp = 218–220 °C; <sup>1</sup>H NMR (400 MHz, CDCl<sub>3</sub>)  $\delta$  7.85 – 7.68 (m, 2H), 7.57 – 7.52 (m, 4H), 7.46 – 7.34 (m, 3H), 7.31 – 7.19 (m, 2H), 7.10 (t, *J* = 7.4 Hz, 1H), 7.02 (d, *J* = 7.5 Hz, 1H), 6.35 (d, *J* = 2.6 Hz, 1H), 4.01 (d, *J* = 2.6 Hz, 1H), 3.44 (d, *J* = 16.2 Hz, 1H), 2.95 (d, *J* = 16.2 Hz, 1H), 1.75 (s, 3H); <sup>13</sup>C NMR (101 MHz, CDCl<sub>3</sub>)  $\delta$  192.6, 146.4, 142.2, 139.5, 133.8, 133.2, 130.2, 129.4, 129.2, 129.1, 129.0, 128.5, 128.4, 128.0, 127.4, 127.3, 124.2, 115.2, 113.3, 52.4, 47.4, 43.5, 37.6, 33.4, 23.3; HRMS (ESI) calcd for C<sub>29</sub>H<sub>21</sub>N<sub>2</sub>O [M+H]<sup>+</sup>: 413.1654; found: 413.1660.

**2a<sup>1</sup>-Isocyano-2a-methyl-7b-(4-phenoxybenzoyl)-2a,2a<sup>1</sup>,7b,7c-tetrahydro-3H-benzo[*f*]cyclopropa[*cd*]indene-2-carbonitrile (2l):**

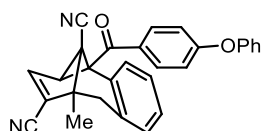

Prepared according to the general procedure as described above in 84% yield (73 mg). It was purified by flash chromatography (10% EtOAc/hexanes; R<sub>f</sub> = 0.3) to afford a colorless solid; mp = 244–246 °C; <sup>1</sup>H NMR (400 MHz, CDCl<sub>3</sub>)  $\delta$  7.69 – 7.58 (m, 2H), 7.46 – 7.31 (m, 2H), 7.30 – 7.18 (m, 3H), 7.17 – 7.08 (m, 1H), 7.03–7.01 (m, 3H), 6.84 (d, *J* = 8.9 Hz, 2H), 6.33 (d, *J* = 2.6 Hz, 1H), 3.96 (d, *J* = 2.6 Hz, 1H), 3.35 (d, *J* = 16.2 Hz, 1H), 2.90 (d, *J* = 16.2 Hz, 1H), 1.72 (s, 3H); <sup>13</sup>C NMR (101 MHz, CDCl<sub>3</sub>)  $\delta$  191.4, 162.7, 154.9, 142.3, 133.7, 132.0, 130.2, 129.3, 129.2, 129.0, 128.7, 128.4, 128.1, 125.1, 124.1, 120.8, 117.0, 115.3, 113.3, 52.4, 47.3, 43.5, 37.5, 33.2, 23.3; HRMS (ESI) calcd for C<sub>29</sub>H<sub>21</sub>N<sub>2</sub>O<sub>2</sub> [M+H]<sup>+</sup>: 429.1603; found: 429.1612.

**2a<sup>1</sup>-Isocyano-2a-methyl-7b-(4-(trifluoromethyl)benzoyl)-2a,2a<sup>1</sup>,7b,7c-tetrahydro-3H-benzo[*f*]cyclopropa[*cd*]indene-2-carbonitrile (2m):**

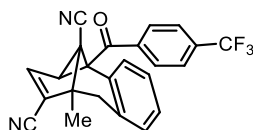

Prepared according to the general procedure as described above in 60% yield (50 mg). It was purified by flash chromatography (20% EtOAc/hexanes;  $R_f = 0.3$ ) to afford a brown solid; mp = 244–246 °C;  $^1\text{H}$  NMR (400 MHz,  $\text{CDCl}_3$ )  $\delta$  7.69 (d,  $J = 8.2$  Hz, 2H), 7.53 (d,  $J = 8.3$  Hz, 2H), 7.23 – 7.13 (m, 2H), 7.05 – 6.93 (m, 1H), 6.86 (d,  $J = 7.6$  Hz, 1H), 6.27 (d,  $J = 2.6$  Hz, 1H), 3.96 (d,  $J = 2.6$  Hz, 1H), 3.32 (d,  $J = 16.3$  Hz, 1H), 2.88 (d,  $J = 16.3$  Hz, 1H), 1.67 (s, 3H);  $^{13}\text{C}$  NMR (126 MHz,  $\text{CDCl}_3$ )  $\delta$  192.5, 141.9, 137.5, 134.8 (q,  $J_{\text{CF}} = 33.1$  Hz), 133.9, 129.8, 129.5, 129.4, 129.4, 128.5, 127.3, 125.9 (q,  $J_{\text{CF}} = 3.4$  Hz), 124.5, 123.4 (q,  $J_{\text{CF}} = 273.5$  Hz), 115.0, 113.1, 52.5, 47.2, 43.5, 37.5, 33.6, 23.3;  $^{19}\text{F}$  NMR (377 MHz,  $\text{CDCl}_3$ )  $\delta$  -63.36; HRMS (ESI) calcd for  $\text{C}_{24}\text{H}_{16}\text{N}_2\text{F}_3\text{O}$   $[\text{M}+\text{H}]^+$ : 405.1203; found: 405.1209.

**Methyl 2-cyano-2a<sup>1</sup>-isocyano-2a-methyl-2a,2a<sup>1</sup>,7b,7c-tetrahydro-3H-benzo[*f*]cyclopropa[*cd*]indene-7b-carbonyl benzoate (2n):**

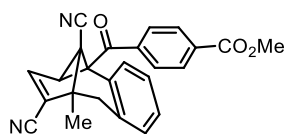

Prepared according to the general procedure as described above in 53% yield (43 mg). It was purified by flash chromatography (20% EtOAc/hexanes;  $R_f = 0.3$ ) to afford a colorless solid; mp = 255–257 °C;  $^1\text{H}$  NMR (400 MHz,  $\text{CDCl}_3$ )  $\delta$  7.98 (d,  $J = 8.4$  Hz, 2H), 7.69 (d,  $J = 8.4$  Hz, 2H), 7.34 – 7.16 (m, 2H), 7.05 (t,  $J = 7.3$  Hz, 1H), 6.92 (d,  $J = 7.6$  Hz, 1H), 6.34 (d,  $J = 2.5$  Hz, 1H), 4.02 (d,  $J = 2.5$  Hz, 1H), 3.89 (s, 3H), 3.40 (d,  $J = 16.2$  Hz, 1H), 2.94 (d,  $J = 16.3$  Hz, 1H), 1.74 (s, 3H);  $^{13}\text{C}$  NMR (101 MHz,  $\text{CDCl}_3$ )  $\delta$  193.0, 165.8, 141.9, 138.0, 134.2, 133.8, 129.8, 129.4, 129.2, 129.2, 129.2, 128.3, 127.3, 124.3, 114.9, 113.1, 52.5, 52.4, 47.2, 43.4, 37.4, 33.6, 23.2; HRMS (ESI) calcd for  $\text{C}_{25}\text{H}_{19}\text{N}_2\text{O}_3$   $[\text{M}+\text{H}]^+$ : 395.1396; found: 395.1432.

**4-Cyanobenzoyl-2a<sup>1</sup>-isocyano-2a-methyl-2a,2a<sup>1</sup>,7b,7c-tetrahydro-3H-benzo[*f*]cyclopropa[*cd*]indene-2-carbonitrile (2o):**

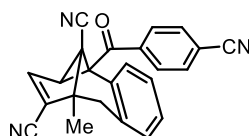

Prepared according to the general procedure as described above in 56% yield (41 mg). It was purified by flash chromatography (20% EtOAc/hexanes;  $R_f = 0.3$ ) to afford a colorless solid; mp = 241–243 °C;  $^1\text{H NMR}$  (400 MHz,  $\text{CDCl}_3$ )  $\delta$  7.81 – 7.52 (m, 4H), 7.35 – 7.22 (m, 2H), 7.11 (t,  $J = 6.9$  Hz, 1H), 6.93 (d,  $J = 7.7$  Hz, 1H), 6.37 (d,  $J = 2.2$  Hz, 1H), 4.06 (d,  $J = 2.2$  Hz, 1H), 3.40 (d,  $J = 16.4$  Hz, 1H), 2.98 (d,  $J = 16.4$  Hz, 1H), 1.77 (s, 3H);  $^{13}\text{C NMR}$  (101 MHz,  $\text{CDCl}_3$ )  $\delta$  192.4, 141.7, 138.0, 134.0, 132.6, 129.7, 129.6, 129.5, 129.4, 128.6, 127.0, 124.6, 117.6, 116.9, 114.9, 113.0, 52.6, 47.1, 43.6, 37.5, 33.8, 23.3; HRMS (ESI) calcd for  $\text{C}_{24}\text{H}_{16}\text{N}_3\text{O}$   $[\text{M}+\text{H}]^+$ : 362.1290; found: 362.1287.

**3-Chlorobenzoyl-2a<sup>1</sup>-isocyano-2a-methyl-2a,2a<sup>1</sup>,7b,7c-tetrahydro-3H-benzo[*f*]cyclopropa[*cd*]indene-2-carbonitrile (2p):**

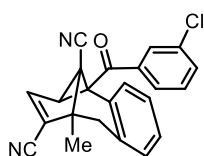

Prepared according to the general procedure as described above in 76% yield (57 mg). It was purified by flash chromatography (10% EtOAc/hexanes;  $R_f = 0.3$ ) to afford a colorless solid; mp = 231–233 °C;  $^1\text{H NMR}$  (400 MHz,  $\text{CDCl}_3$ )  $\delta$  7.52 (d,  $J = 8.6$  Hz, 2H), 7.25 – 7.12 (m, 4H), 7.04 – 6.97 (m, 1H), 6.87 (d,  $J = 7.6$  Hz, 1H), 6.26 (d,  $J = 2.6$  Hz, 1H), 3.91 (d,  $J = 2.6$  Hz, 1H), 3.30 (d,  $J = 16.3$  Hz, 1H), 2.86 (d,  $J = 16.3$  Hz, 1H), 1.65 (s, 3H);  $^{13}\text{C NMR}$  (126 MHz,  $\text{CDCl}_3$ )  $\delta$  192.0, 142.0, 140.3, 133.8, 132.9, 130.8, 129.3, 129.2, 129.2, 128.4, 127.6, 124.3, 115.0, 113.2, 52.4, 47.1, 43.5, 37.4, 33.4, 23.3; HRMS (ESI) calcd for  $\text{C}_{23}\text{H}_{16}\text{ON}_2\text{Cl}$   $[\text{M}+\text{H}]^+$ : 371.0945; found: 371.0945.

**2a<sup>1</sup>-Isocyano-2a-methyl-7b-(3-methylbenzoyl)-2a,2a<sup>1</sup>,7b,7c-tetrahydro-3H-benzo[*f*]cyclopropa[*cd*]indene-2-carbonitrile (2q):**

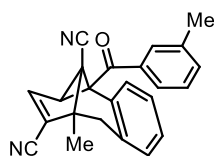

Prepared according to the general procedure as described above in 73% yield (54 mg). It was purified by flash chromatography (10% EtOAc/hexanes;  $R_f = 0.3$ ) to afford a colorless solid; mp = 218–220 °C;  $^1\text{H NMR}$  (400 MHz,  $\text{CDCl}_3$ )  $\delta$  7.58 (s, 1H), 7.37 (d,  $J = 7.7$  Hz, 1H), 7.31 – 7.16 (m, 4H), 7.07 (t,  $J = 7.3$  Hz, 1H), 6.96 (d,  $J = 7.4$  Hz, 1H), 6.33 (d,  $J = 2.6$  Hz, 1H), 3.98 (d,  $J = 2.6$  Hz, 1H), 3.40 (d,  $J = 16.2$  Hz, 1H), 2.93 (d,  $J = 16.2$  Hz, 1H), 2.30 (s, 3H), 1.74 (s, 3H);  $^{13}\text{C NMR}$  (126 MHz,  $\text{CDCl}_3$ )  $\delta$  193.3, 142.3, 138.6, 134.6, 134.6, 133.8, 130.1, 129.3, 129.0, 129.0, 128.5, 128.2, 128.1, 126.7, 124.1, 115.2, 113.3, 52.4, 47.3, 43.5, 37.5, 33.4, 23.3, 21.4; HRMS (ESI) calcd for  $\text{C}_{24}\text{H}_{19}\text{ON}_2$   $[\text{M}+\text{H}]^+$ : 351.1495; found: 351.1491.

**3,4-Dichlorobenzoyl-2a<sup>1</sup>-isocyano-2a-methyl-2a,2a<sup>1</sup>,7b,7c-tetrahydro-3H-benzo[*f*]cyclopropa[*cd*]indene-2-carbonitrile (2r):**

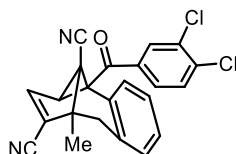

Prepared according to the general procedure as described above in 74% yield (62mg). It was purified by flash chromatography (10% EtOAc/hexanes;  $R_f = 0.3$ ) to afford a colorless solid; mp = 250–252 °C;  $^1\text{H NMR}$  (400 MHz,  $\text{CDCl}_3$ )  $\delta$  7.74 (s, 1H), 7.32 (d,  $J = 7.7$  Hz, 2H), 7.24 – 7.13 (m, 2H), 7.04 (dd,  $J = 10.2, 3.9$  Hz, 1H), 6.87 (d,  $J = 7.6$  Hz, 1H), 6.26 (d,  $J = 2.4$  Hz, 1H), 3.92 (d,  $J = 2.4$  Hz, 1H), 3.29 (d,  $J = 16.3$  Hz, 1H), 2.88 (d,  $J = 16.3$  Hz, 1H), 1.67 (s, 3H);  $^{13}\text{C NMR}$  (101 MHz,  $\text{CDCl}_3$ )  $\delta$  191.2, 141.8, 138.6, 134.1, 133.8, 133.7, 131.6, 130.9, 129.6, 129.4, 129.4, 128.6, 128.3, 127.2, 124.4, 114.9, 113.1, 52.5, 47.0, 43.5, 37.4, 33.5, 23.3; HRMS (ESI) calcd for  $\text{C}_{23}\text{H}_{15}\text{N}_2\text{Cl}_2\text{O}$   $[\text{M}+\text{H}]^+$ : 405.0561; found: 405.0587.

**3-Bromo-4-chlorobenzoyl-2a<sup>1</sup>-isocyano-2a,5-dimethyl-2a,2a<sup>1</sup>,7b,7c-tetrahydro-3H-benzo[*f*]cyclopropa[*cd*]indene-2-carbonitrile (2s):**

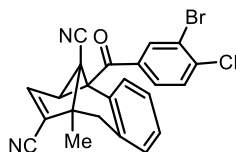

Prepared according to the general procedure as described above in 71% yield (65 mg). It was purified by flash chromatography (10% EtOAc/hexanes;  $R_f = 0.3$ ) to afford a colorless solid; mp = 242–244 °C;  $^1\text{H NMR}$  (400 MHz,  $\text{CDCl}_3$ )  $\delta$  7.81 (d,  $J = 2.1$  Hz, 1H), 7.59 (d,  $J = 8.4$  Hz, 1H), 7.39 – 7.22 (m, 3H), 7.21 – 7.10 (m, 1H), 6.96 (d,  $J = 7.7$  Hz, 1H), 6.36 (d,  $J = 2.6$  Hz, 1H), 4.02 (d,  $J = 2.6$  Hz, 1H), 3.38 (d,  $J = 16.3$  Hz, 1H), 2.97 (d,  $J = 16.3$  Hz, 1H), 1.76 (s, 3H);  $^{13}\text{C NMR}$  (101 MHz,  $\text{CDCl}_3$ )  $\delta$  191.4, 141.8, 135.7, 134.8, 134.2, 133.8, 131.2, 129.6, 129.4, 129.4, 129.2, 128.6, 128.2, 127.2, 124.4, 114.9, 113.1, 52.5, 47.0, 43.5, 37.4, 33.5, 23.3; HRMS (ESI) calcd for  $\text{C}_{23}\text{H}_{14}\text{ON}_2\text{BrCl}$   $[\text{M}]^+$ : 447.9975; found: 447.9972.

**7b-Benzoyl-2a<sup>1</sup>-isocyano-2a,5-dimethyl-2a,2a<sup>1</sup>,7b,7c-tetrahydro-3H-benzo[*f*]cyclopropa[*cd*]indene-2-carbonitrile (2t):**

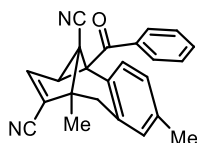

Prepared according to the general procedure as described above in 55% yield (40 mg). It was purified by flash chromatography (10% EtOAc/hexanes;  $R_f = 0.3$ ) to afford a colorless solid; mp = 242–244 °C;  $^1\text{H NMR}$  (300 MHz,  $\text{CDCl}_3$ )  $\delta$  7.67 (dd,  $J = 5.3, 3.3$  Hz, 2H), 7.55 – 7.42 (m, 1H), .37 – 7.29 (m, 2H), 7.04 (s, 1H), 6.85 (d,  $J = 1.9$  Hz, 2H), 6.33 (d,  $J = 2.6$  Hz, 1H), 3.96 (d,  $J = 2.6$  Hz, 1H), 3.36 (d,  $J = 16.2$  Hz, 1H), 2.87 (d,  $J = 16.2$  Hz, 1H), 2.26 (s, 3H), 1.72 (s, 3H);  $^{13}\text{C NMR}$  (126 MHz,  $\text{CDCl}_3$ )  $\delta$  193.4, 142.3, 139.1, 134.7, 133.7, 133.6, 129.7, 129.7, 129.2, 129.1, 128.8, 124.8, 124.3, 115.3, 113.4, 52.4, 47.3, 43.4, 37.6, 33.3, 23.4, 21.3; HRMS (ESI) calcd for  $\text{C}_{24}\text{H}_{19}\text{N}_2\text{O}$   $[\text{M}+\text{H}]^+$ : 351.1497; found: 351.1494.

**7b-Benzoyl-6-chloro-2a<sup>1</sup>-isocyano-2a-methyl-2a,2a<sup>1</sup>,7b,7c-tetrahydro-3H-benzo[*f*]cyclopropa[*cd*]indene-2-carbonitrile (2u):**

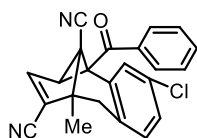

Prepared according to the general procedure as described above in 58% yield (45 mg). It was purified by flash chromatography (10% EtOAc/hexanes;  $R_f = 0.3$ ) to afford a colorless solid; mp = 261–263 °C ;  $^1\text{H NMR}$  (400 MHz,  $\text{CDCl}_3$ )  $\delta$  7.59– 7.56 (m, 2H), 7.47 – 7.37 (m, 1H), 7.31 – 7.26 (m, 2H), 7.22 – 7.15 (m, 1H), 6.98 (ddd,  $J = 8.3, 2.2, 0.7$  Hz, 1H), 6.83 (d,  $J = 8.3$  Hz, 1H), 6.28 (d,  $J = 2.6$  Hz, 1H), 3.93 (d,  $J = 2.6$  Hz, 1H), 3.32 (d,  $J = 16.3$  Hz, 1H), 2.83 (d,  $J = 16.3$  Hz, 1H), 1.67 (s, 3H);  $^{13}\text{C NMR}$  (101 MHz,  $\text{CDCl}_3$ )  $\delta$  192.8, 142.2, 135.8, 134.8, 134.5, 134.0, 130.7, 129.5, 129.1, 128.9, 128.7, 126.6, 124.2, 114.9, 113.1, 52.4, 46.9, 43.5, 37.4, 33.5, 23.2; HRMS (ESI) calcd for  $\text{C}_{23}\text{H}_{16}\text{ClN}_2\text{O}$   $[\text{M}+\text{H}]^+$ : 371.0940; found: 371.0945.

**Control experiment on 1a:**

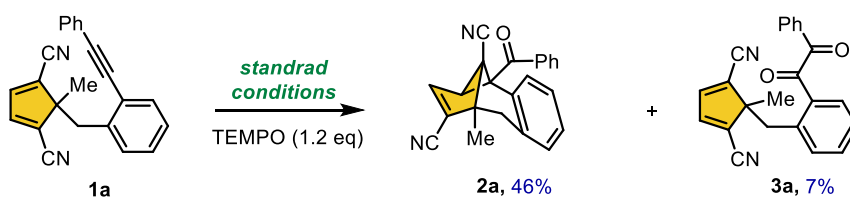

A dried screw-cap vial was charged with dinitrile alkyne **1a** (0.2 mmol, 1.0 equiv), and  $\text{AgNO}_3$  (3.4 mg, 10.0 mol%) in  $\text{CH}_2\text{Cl}_2$  (2 mL, 0.1 M) then added  $\text{HClO}_4$  (18  $\mu\text{L}$ , ~70% aqueous solution, 1.0 equiv) and TEMPO (37 mg, 1.2 equiv). The reaction mixture was stirred at 50 °C in oil bath for 30 min (monitored by TLC). Then, it was cooled to room temperature and quenched with aqueous  $\text{NaHCO}_3$  (5 mL) solution. The mixture was extracted with  $\text{CH}_2\text{Cl}_2$  (3 x 5 mL), combined organic layer was dried over anhydrous  $\text{Na}_2\text{SO}_4$  and concentrated under reduced pressure. The residue was purified

by flash column chromatography on silica gel (hexanes/ethyl acetate) to afford product **2a** in 46% yield and by-product **3a** in 7% yield.

### III.C. Gram-scale reaction of **1j**:

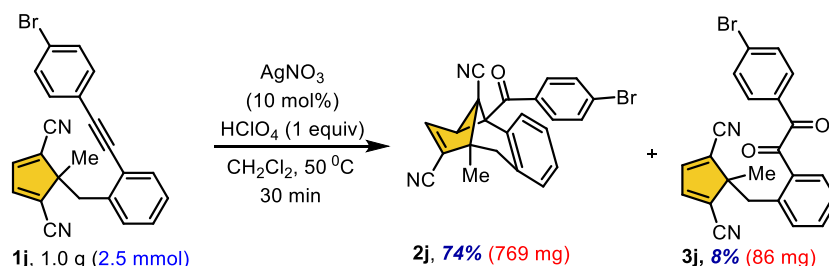

A dried screw-cap vial was charged with alkyne **1j** (2.5 mmol, 1.0 equiv), and  $\text{AgNO}_3$  (42.2 mg, 10.0 mol%) in  $\text{CH}_2\text{Cl}_2$  (17 mL, 0.1 M) then added  $\text{HClO}_4$  (0.2 mL, ~70% aqueous solution, 1.0 equiv). The reaction mixture was stirred at  $50^\circ\text{C}$  in oil bath for 1 hour (monitored by TLC). Then, it was cooled to room temperature and quenched with aqueous  $\text{NaHCO}_3$  (15 mL) solution. The mixture was extracted with  $\text{CH}_2\text{Cl}_2$  (3 x 20 mL), combined organic layer was dried over anhydrous  $\text{Na}_2\text{SO}_4$  and concentrated under reduced pressure. The residue was purified by to flash column chromatography on silica gel (10% EtOAc/hexanes;  $R_f=0.3$ ) to afford the desired product **2j** (74%, 769 mg) and by-product **3j** (8%, 86 mg). [Note: For small scale reaction, we didn't observe any problem with aq.  $\text{HClO}_4$ . However, for large scale, it recommends to perform the reaction in the presence of laboratory protective shield]

#### Synthetic utility:

#### **2a<sup>1</sup>-Isocyano-2a-methyl-7b-(4-(phenylethynyl)benzoyl)-2a,2a<sup>1</sup>,7b,7c-tetrahydro-3H-benzo[*f*]cyclopropa[*cd*]indene-2-carbonitrile (**4**):<sup>4</sup>**

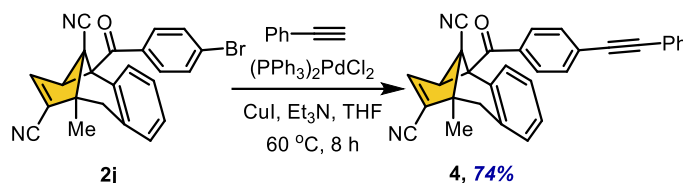

To a solution of **2j** (0.14 mmol, 1 equiv) in anhydrous THF (0.5 M), was added  $\text{Pd}(\text{PPh}_3)_2\text{Cl}_2$  (2 mol%),  $\text{CuI}$  (5 mol%),  $\text{Et}_3\text{N}$  (1.7 equiv) and phenyl acetylene (1.2 equiv). The mixture was stirred at  $60^\circ\text{C}$  for 8h. The reaction was cooled to room temperature, diluted with water (5 mL), and extracted with EtOAc (3 x 10 mL). The combined organic phase was dried over anhydrous  $\text{Na}_2\text{SO}_4$ , and concentrated in *vacuo*. The obtained crude residue was purified by flash chromatography (20% EtOAc/hexanes;  $R_f = 0.3$ ) to afford desired product **4** as a colorless solid in 74% yield (47 mg); mp =  $255\text{--}257^\circ\text{C}$ ;  $^1\text{H}$  NMR (400 MHz,  $\text{CDCl}_3$ )  $\delta$  7.53 (d,  $J = 8.6$  Hz, 2H), 7.48 – 7.33 (m, 5H), 7.31 – 7.02 (m, 6H), 6.45 (d,  $J = 2.2$  Hz, 1H), 5.92 (d,  $J = 2.2$  Hz, 1H), 2.88 (d,  $J = 14.9$  Hz, 1H), 2.78 (d,  $J = 14.9$  Hz, 1H), 1.50 (s, 3H);  $^{13}\text{C}$  NMR (101 MHz,  $\text{CDCl}_3$ )  $\delta$  149.1, 139.4, 135.3, 131.8, 131.7, 130.1, 128.7, 128.5, 128.5,

127.7, 127.5, 126.6, 125.1, 122.9, 118.1, 113.8, 107.5, 91.6, 89.1, 88.9, 59.7, 57.6, 41.7, 26.0; HRMS (ESI) calcd for C<sub>31</sub>H<sub>21</sub>N<sub>2</sub>O [M+H]<sup>+</sup>: 437.1654; found: 437.1632.

#### 7b-Benzoyl-2a<sup>1</sup>-isocyano-2a-methyl-2a,2a<sup>1</sup>,7b,7c-tetrahydro-3H-benzo[f]cyclopropa[cd]indene-2-carbonitrile (**2a**):<sup>4</sup>

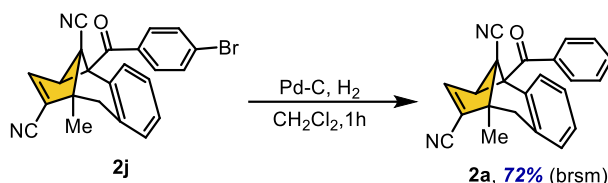

To a stirred solution of compound **2j** (0.15 mmol, 1 equiv) in CH<sub>2</sub>Cl<sub>2</sub> (2 mL, 0.1 M) added 10% Pd/C (0.1 equiv) and continued the reaction under hydrogen atmosphere for 1 h. Then, the reaction mixture was filtered through celite, concentrated under reduced pressure. The crude product was purified using flash column chromatography (10% EtOAc/hexane R<sub>f</sub> = 0.5) to obtain **2a** in 72% yield (18 mg) based on recovered starting material **2j**.

#### Oxidation on **2j** :<sup>5</sup>

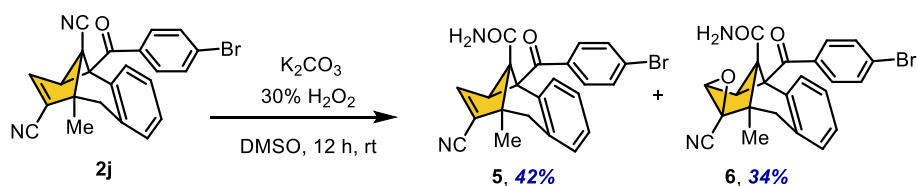

To a solution of compound **2j** (0.14 mmol, 1 equiv) in DMSO (4 mL) was added K<sub>2</sub>CO<sub>3</sub> (39 mg, 2.0 equiv) and 30% H<sub>2</sub>O<sub>2</sub> (0.2 mL, 10 equiv). The reaction mixture was allowed to stir at room temperature for 12 h and quenched with saturated aqueous NaHCO<sub>3</sub> (10 mL). The reaction mixture was extracted with EtOAc (2 x 15 mL), dried combined organic layer over Na<sub>2</sub>SO<sub>4</sub> and evaporated *in vacuo*. The residue was purified by chromatography on silica gel (30% EtOAc/hexanes;) to provide compound **5** (R<sub>f</sub> = 0.3) in 42% yield (26 mg) and compound **6** (R<sub>f</sub> = 0.5) in 34% yield (22 mg).

#### 4-Bromobenzoyl-2a-methyl-2a<sup>1</sup>-((oxo-13-methyl)-14-azaneyl)-2a,2a<sup>1</sup>,7b,7c-tetrahydro-3H-benzo[f]cyclopropa[cd]indene-2-carbonitrile (**5**):

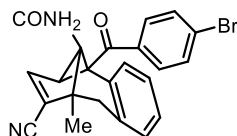

Colour: colorless solid; mp = 257–259 °C; <sup>1</sup>H NMR (400 MHz, CDCl<sub>3</sub>) δ 7.53 – 7.49 (m, 2H), 7.47 – 7.42 (m, 2H), 7.39 (d, J = 7.7 Hz, 1H), 7.22 (td, J = 7.5, 1.3 Hz, 1H), 7.06 (t, J = 7.5 Hz, 1H), 6.97



(dd,  $J = 7.7, 1.0$  Hz, 1H), 6.03 (s, 1H), 5.16 (s, 1H), 3.77 (d,  $J = 15.8$  Hz, 1H), 3.72 (d,  $J = 0.5$  Hz, 1H), 3.48 (d,  $J = 0.5$  Hz, 1H), 3.20 (d,  $J = 15.8$  Hz, 1H), 1.66 (s, 3H);  $^{13}\text{C}$  NMR (101 MHz,  $\text{CDCl}_3$ )  $\delta$  193.4, 165.1, 145.0, 135.9, 133.9, 132.1, 131.4, 131.0, 129.3, 129.1, 128.9, 128.7, 128.3, 127.7, 116.0, 52.2, 46.9, 41.8, 38.0, 35.2, 23.1; HRMS (ESI) calcd for  $\text{C}_{23}\text{H}_{18}\text{BrN}_2\text{O}_2$   $[\text{M}+\text{H}]^+$ : 433.0551; found: 433.0541.

**6b-(4-Bromobenzoyl)-1b-methyl-1b<sup>1</sup>-((oxo-1<sup>3</sup>-methyl)-14-azaneyl)-1b,1b<sup>1</sup>,2,6b,6c,6d-hexahydro-1aH-benzo[5,6]cyclopropa[3,4]indeno[1,2-b]oxirene-1a-carbonitrile (6):**

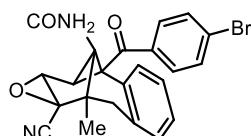

Colour: colorless solid; mp = 261–263 °C;  $^1\text{H}$  NMR (400 MHz,  $\text{CDCl}_3$ )  $\delta$  7.60 – 7.52 (m, 2H), 7.50 – 7.40 (m, 2H), 7.16 (ddd,  $J = 10.6, 8.8, 4.2$  Hz, 2H), 7.02 (t,  $J = 7.4$  Hz, 1H), 6.91 (d,  $J = 7.5$  Hz, 1H), 6.02 (d,  $J = 2.5$  Hz, 1H), 5.29 (s, 2H), 3.89 (d,  $J = 2.5$  Hz, 1H), 3.46 (d,  $J = 15.7$  Hz, 1H), 3.23 (d,  $J = 15.7$  Hz, 1H), 1.77 (s, 3H);  $^{13}\text{C}$  NMR (126 MHz,  $\text{CDCl}_3$ )  $\delta$  192.1, 166.9, 134.8, 133.5, 132.1, 131.1, 130.8, 129.0, 128.8, 128.3, 128.0, 127.9, 116.2, 64.2, 64.1, 46.8, 46.1, 40.1, 38.1, 21.0; HRMS (ESI) calcd for  $\text{C}_{23}\text{H}_{18}\text{BrN}_2\text{O}_3$   $[\text{M}+\text{H}]^+$ : 449.0486; found: 449.0495.

**Failure examples :**

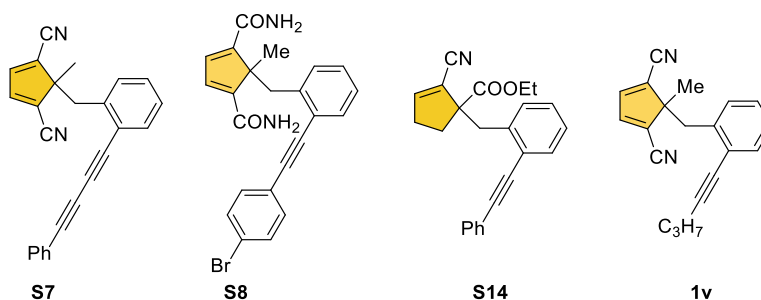

**S7** and **1v** were failed to give the desired product under standard reaction conditions and in both cases >80% of starting material was recovered, while in the case of **S8** and **S14** starting material decomposed over the course of the reaction.

## IV. X-Ray crystallographic data:

### X-ray crystallographic data for compound **2a**:

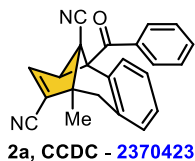

The purified compound **2a** was dissolved in a mixed solvent of CH<sub>2</sub>Cl<sub>2</sub>/n-hexane (1:5), and placed in a dark cabinet for slowly evaporation. White crystals were collected after few days for X-ray analysis

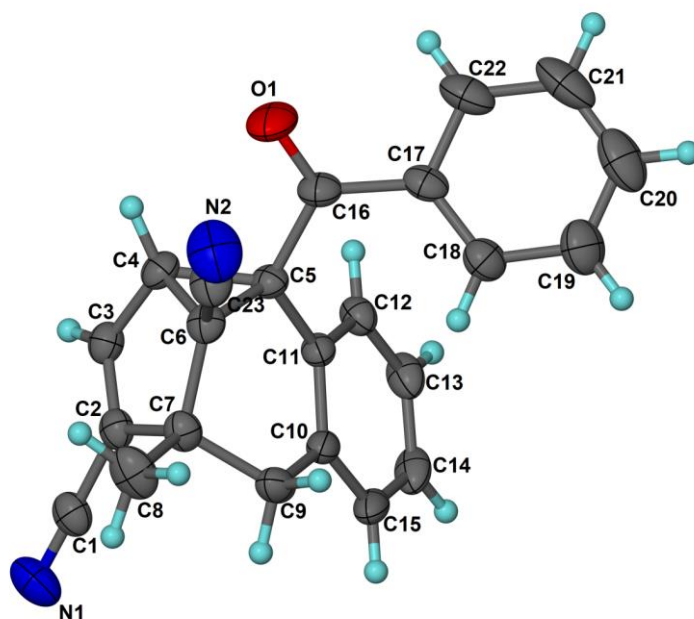

Figure caption: ORTEP diagram of KB1011 compound with the atom-numbering. Displacement ellipsoids are drawn at the 30% probability level and H atoms are shown as small spheres of arbitrary radius.

**Crystal data for compound 2a (KB1011)**: C<sub>23</sub>H<sub>16</sub>N<sub>2</sub>O,  $M = 336.38$ , Orthorhombic, Space group *Pbca* (No.61),  $a = 9.5854(7)\text{\AA}$ ,  $b = 17.6825(13)\text{\AA}$ ,  $c = 21.0981(14)\text{\AA}$ ,  $\alpha = 90^\circ$ ,  $\beta = 90^\circ$ ,  $\gamma = 90^\circ$ ,  $V = 3576.0(4)\text{\AA}^3$ ,  $Z = 8$ ,  $D_c = 1.250\text{ g/cm}^3$ ,  $F_{000} = 1408$ , Bruker D8 QUEST PHOTON III C7 HPAD detector, Mo-K $\alpha$  radiation,  $\lambda = 0.71073\text{ \AA}$ ,  $T = 294(2)\text{K}$ ,  $2\theta_{\text{max}} = 55^\circ$ ,  $\mu = 0.077\text{ mm}^{-1}$ , 30918 reflections collected, 4088 unique ( $R_{\text{int}} = 0.0475$ ), 237 parameters,  $RI = 0.0491$ ,  $wR2 = 0.1273$ ,  $R$  indices based on 2403 reflections with  $I > 2\sigma(I)$  (refinement on  $F^2$ ), Final  $GooF = 1.019$ , largest difference hole and peak =  $-0.178$  and  $0.132\text{ e.\AA}^{-3}$ . The **CCDC deposition number 2370423** contains the supplementary crystallographic data for this paper which can be obtained free of charge at <https://www.ccdc.cam.ac.uk/structures/>

### **Data collection and Structure solution details:**

X-ray data for the compound were collected at room temperature on a Bruker D8 QUEST instrument with an I $\mu$ S Mo microsource ( $\lambda = 0.7107 \text{ \AA}$ ) and a PHOTON-III C7 HPAD detector. The raw data frames were reduced and corrected for absorption effects using the Bruker Apex 3 software suite programs<sup>7</sup>. The structure was solved using intrinsic phasing method<sup>7</sup> and further refined with the SHELXL<sup>8-10</sup> program and expanded using Fourier techniques. Anisotropic displacement parameters were included for all non-hydrogen atoms. All C bound H atoms were positioned geometrically and treated as riding on their parent C atoms [C-H = 0.93-0.97  $\text{\AA}$ , and Uiso(H) = 1.5Ueq(C) for methyl H or 1.2Ueq(C) for other H atoms]. **CCDC deposition number 2370423** contains the supplementary crystallographic data for this paper which can be obtained free of charge at <https://www.ccdc.cam.ac.uk/structures/>

### **V. References :**

1. S. Maurya, S. B. Jadhav and R. Chegondi, *Org. Biomol. Chem.*, 2022, **20**, 2059.
2. A. Yu-Fei, W. De-Xian, Z Liang and W. Mei-Xiang, *Chem. Asian J.*, 2014, **9**, 1–11.
3. M. Anandarao, G. Krishna Kumar, N. B. Jagadeesh, and C. Rambabu, *Org. Lett.*, 2020, **22**, 7019–7024.
4. A. Munakala, T. Nallamilli, J. B. Nanubolu and R. Chegondi, *Org. Lett.*, 2022, **24**, 892–896.
5. Current Patent Assignee: ACETYLON PHARMACEUTICALS - US2015/105384, 2015, A1  
Location in patent: Paragraph 0331; 0332.
6. H. Schick, H. Schwarz, A. Finger and S. Schwarz, *Tetrahedron*, 1982, **38**, 1279-1283.
7. Bruker (2016). APEX3, SAINT and SADABS. Bruker AXS, Inc., Madison, Wisconsin, USA.
8. G. M. Sheldrick, *Acta Crystallogr.*, 2015, **C71**: 3-8.
9. C. B. Hübschle, G. M. Sheldrick and B. Dittrich, ShelXle: a Qt graphical user interface for SHELXL, *J. Appl. Cryst.*, 2011, **44**, 1281-1284.
10. Muller, P, Herbst-Imer, R, Spek, A. L, Schneider, T. R, and Sawaya, M. R. Crystal Structure Refinement: A Crystallographer's Guide to SHELXL. Muller, P. Ed. 2006 Oxford University Press: Oxford, New York, pp. 57–91.

## VII. $^1\text{H}$ & $^{13}\text{C}$ NMR Spectra

### 2-(2-Bromobenzyl)-2-methylcyclopenta-3,5-diene-1,3-dicarbonitrile (S4):

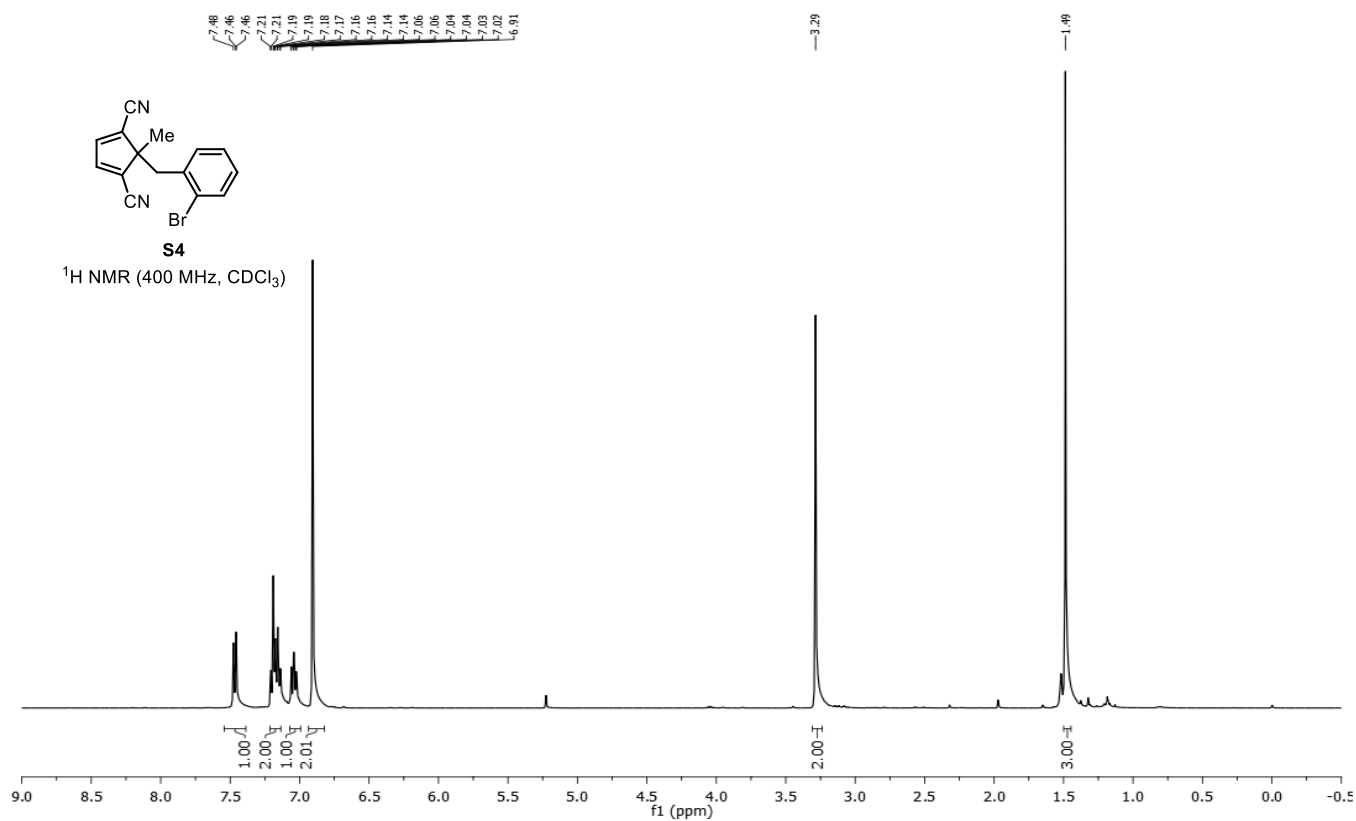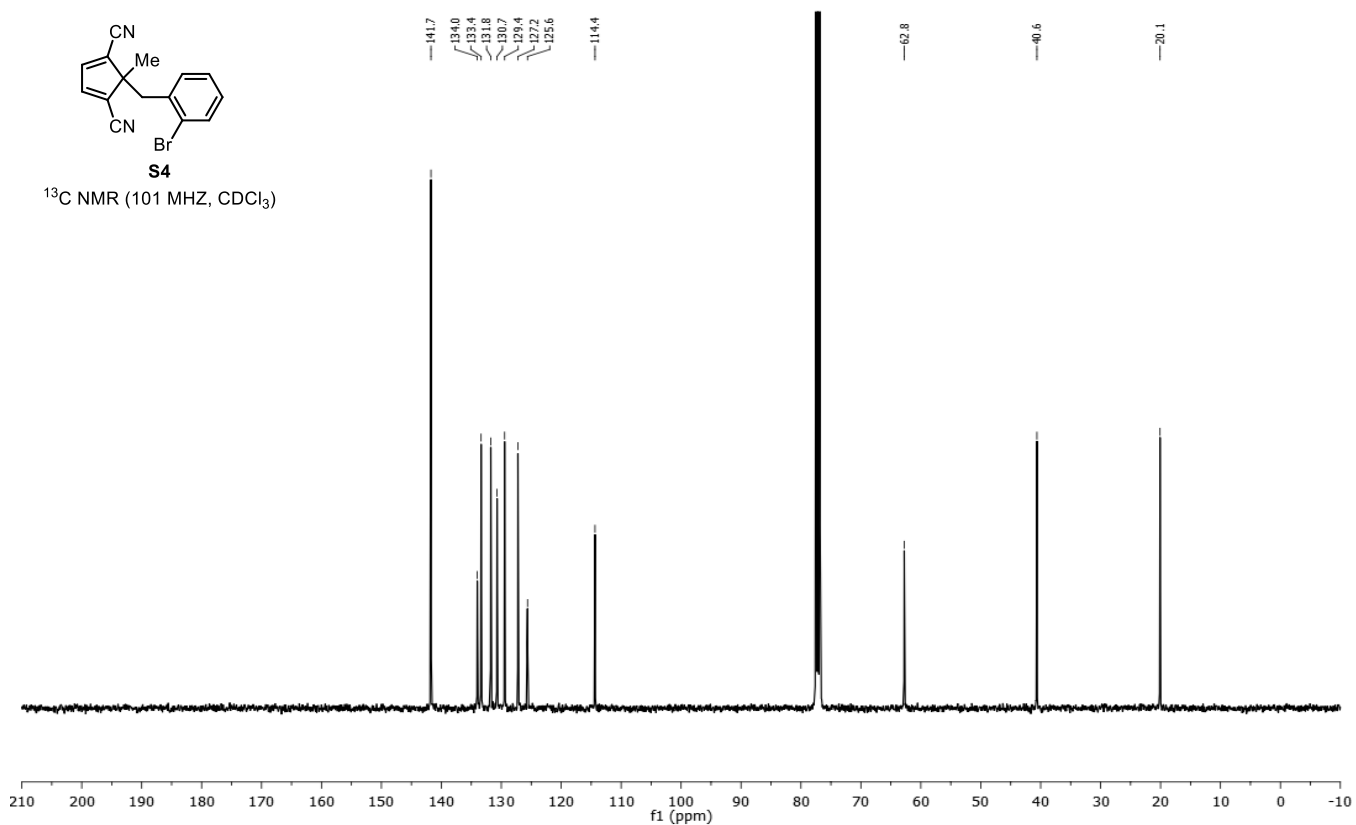

## 2-(2-Ethynylbenzyl)-2-methylcyclopenta-3,5-diene-1,3-dicarbonitrile (S6):

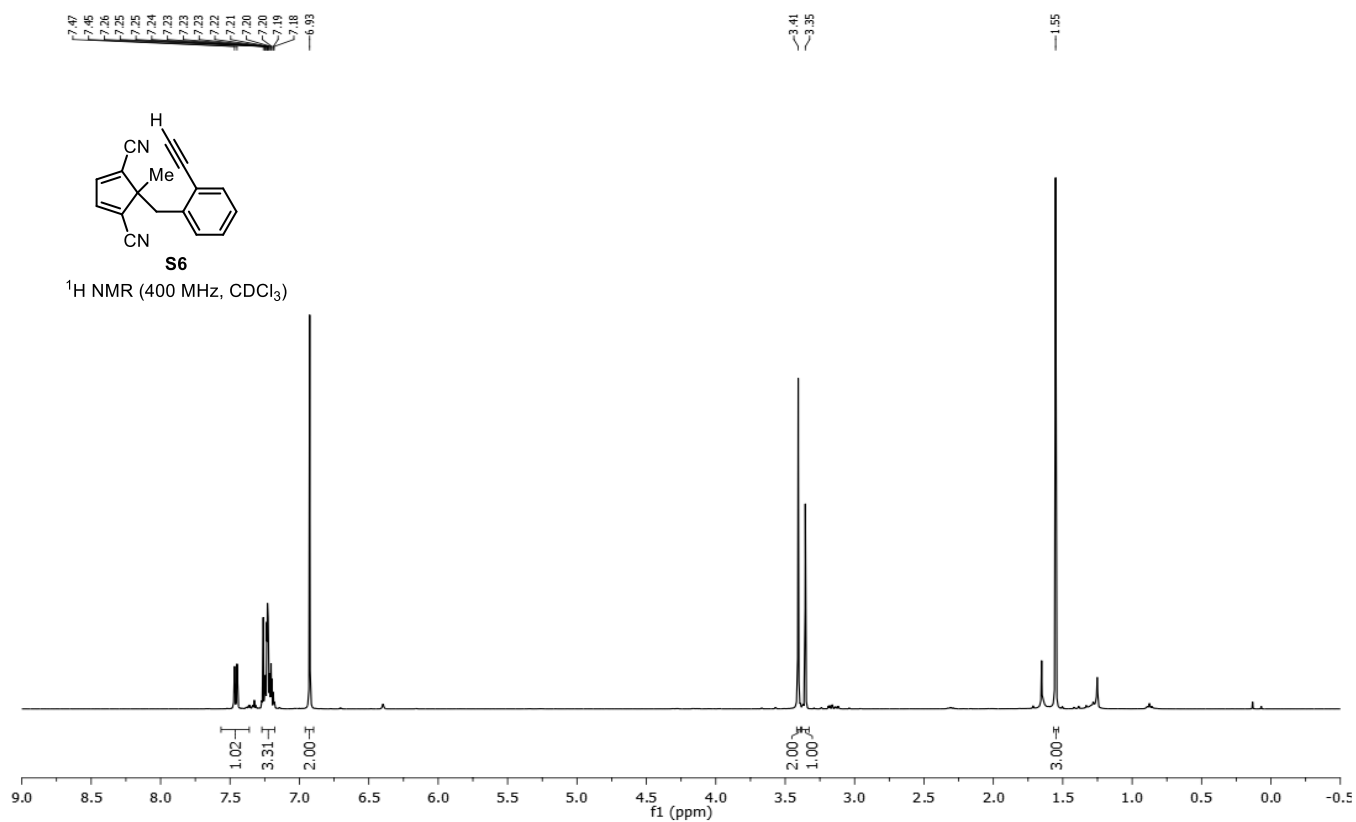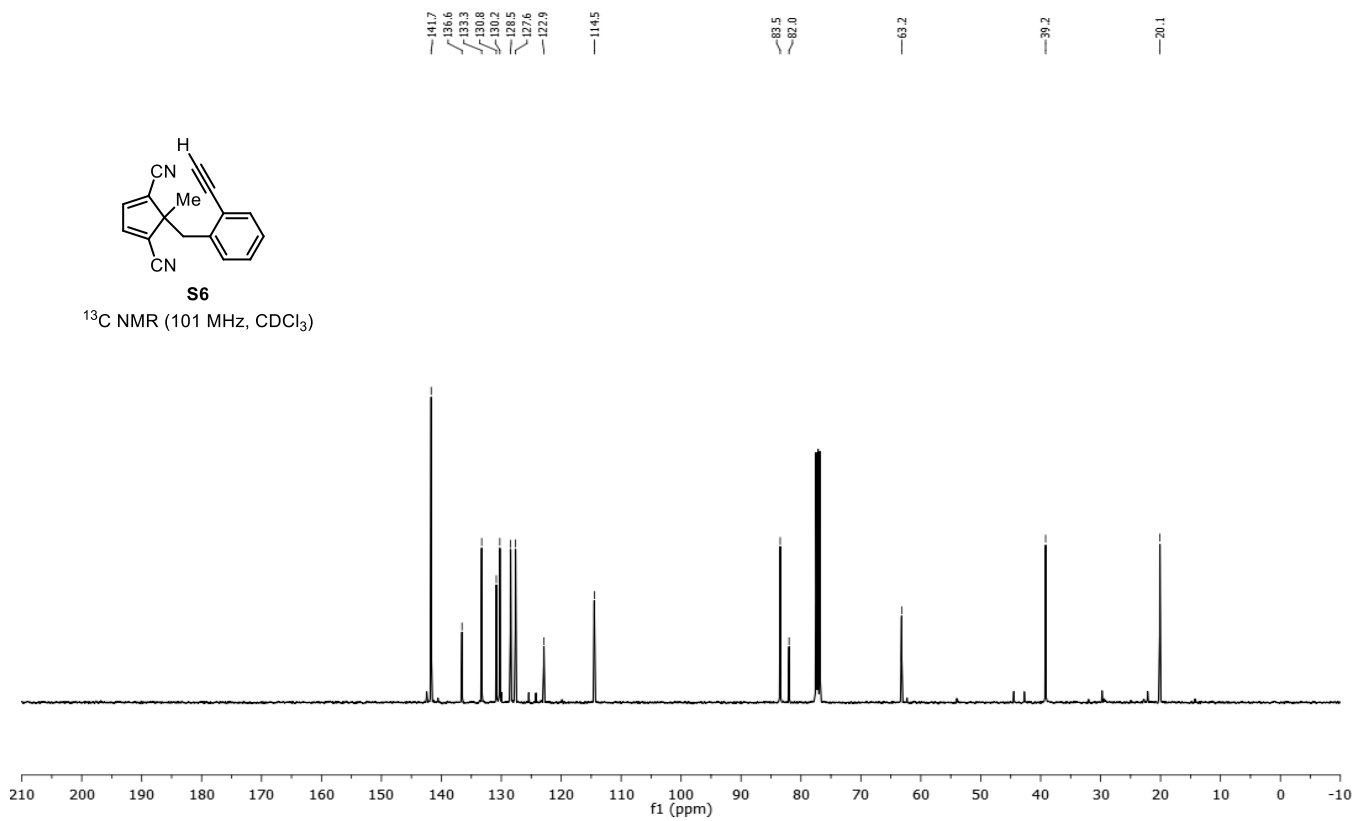

## 2-Methyl-2-(2-(phenylethynyl)benzyl)cyclopenta-3,5-diene-1,3-dicarbonitrile (**1a**):

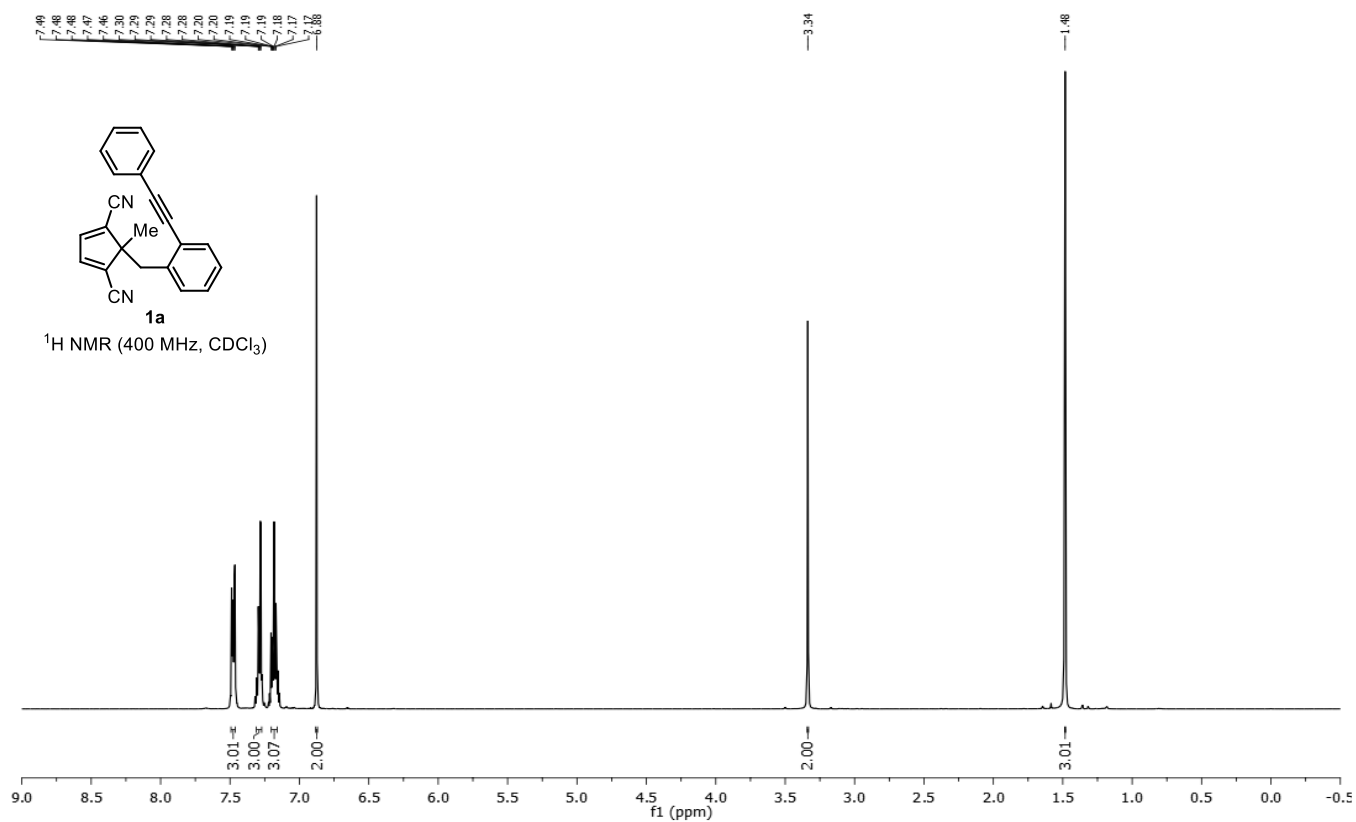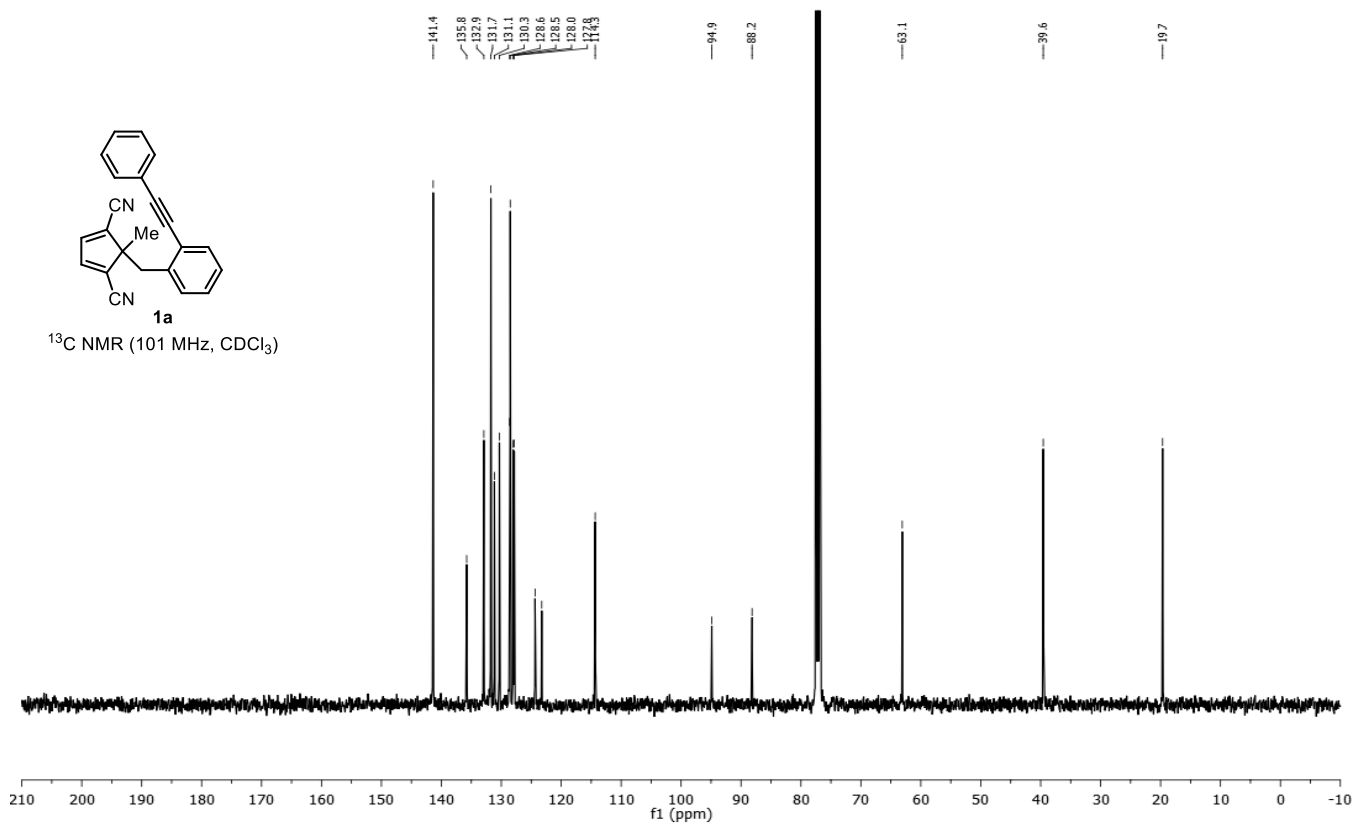

## 2-Methyl-2-(2-(p-tolyethynyl)benzyl)cyclopenta-3,5-diene-1,3-dicarbonitrile (**1b**):

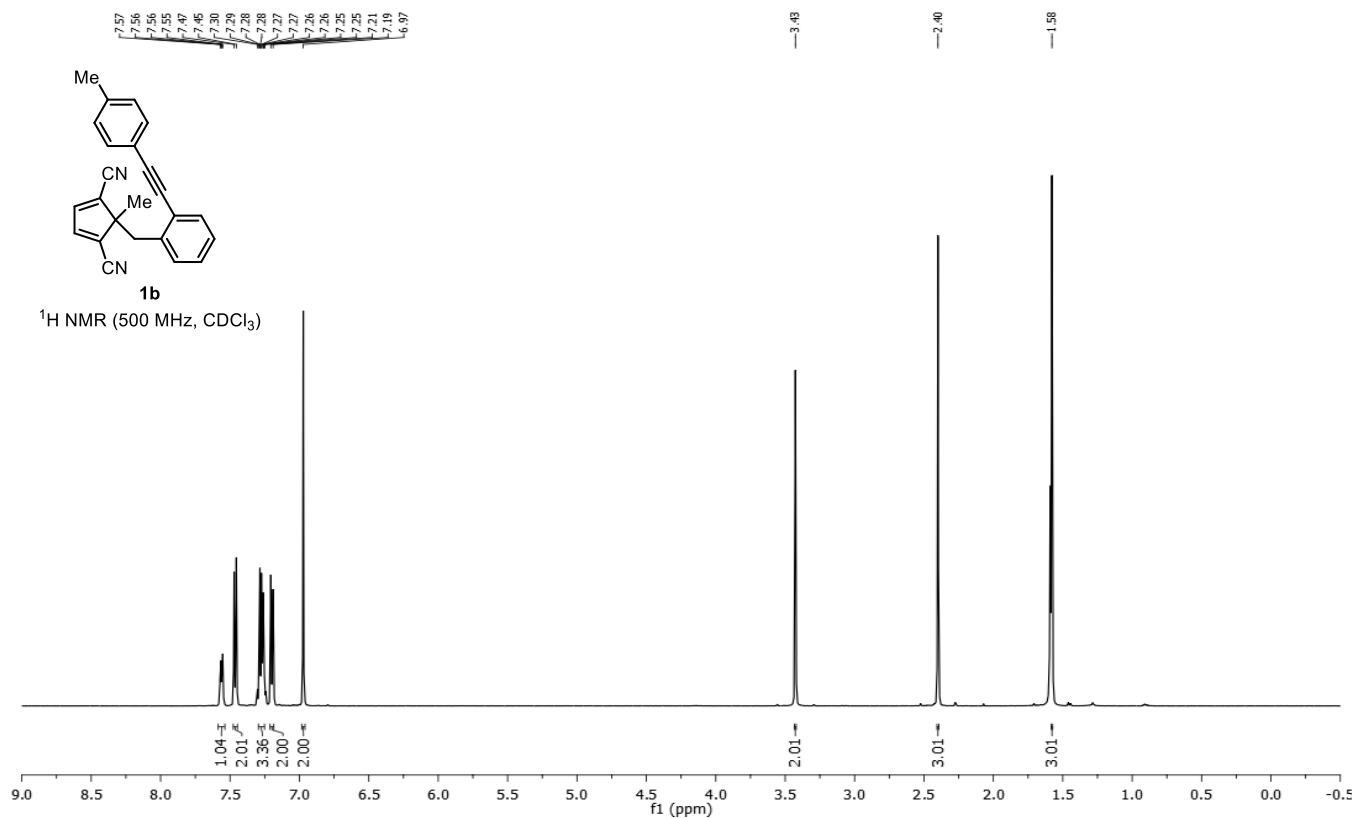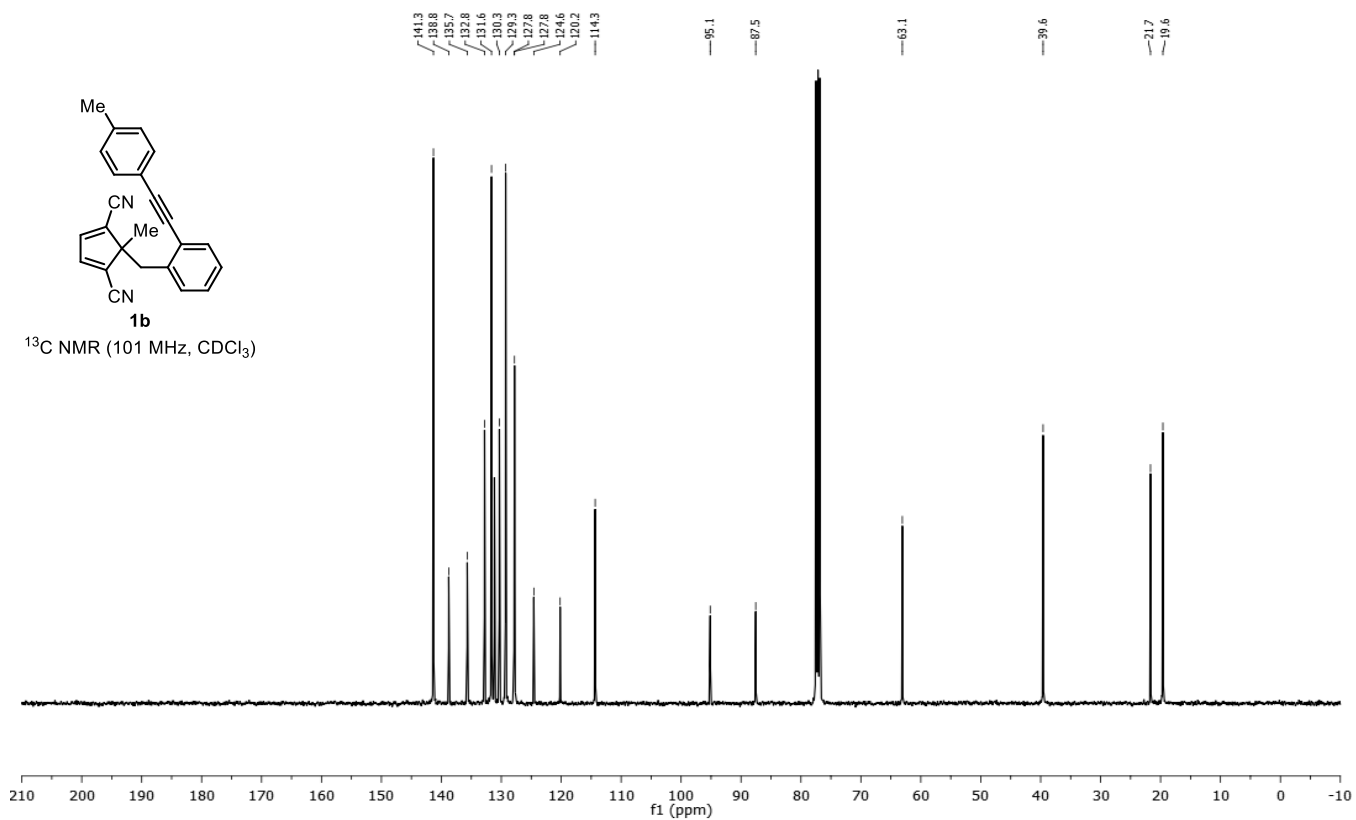





## 2-(2-((4-Methoxyphenyl)ethynyl)benzyl)-2-methylcyclopenta-3,5-diene-1,3-dicarbonitrile (**1d**):

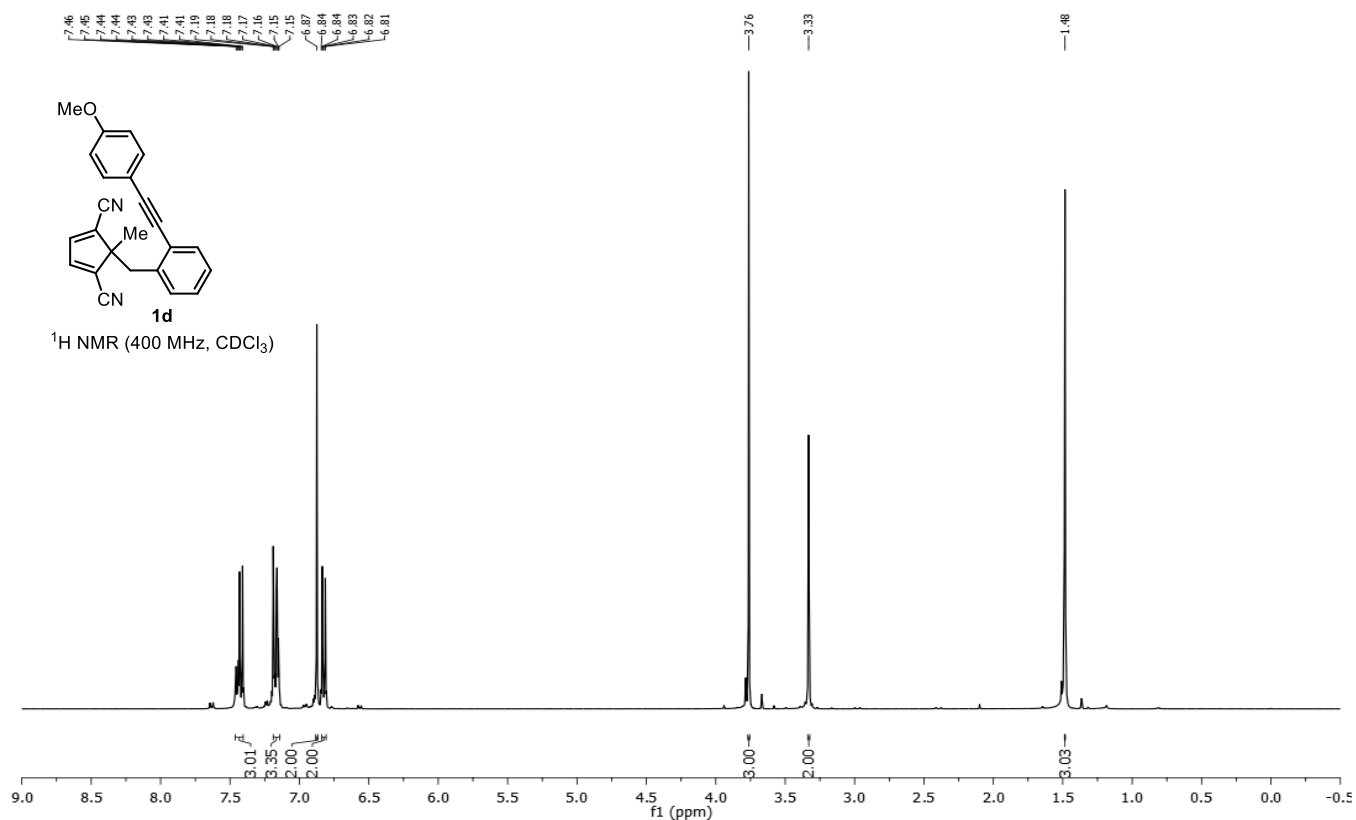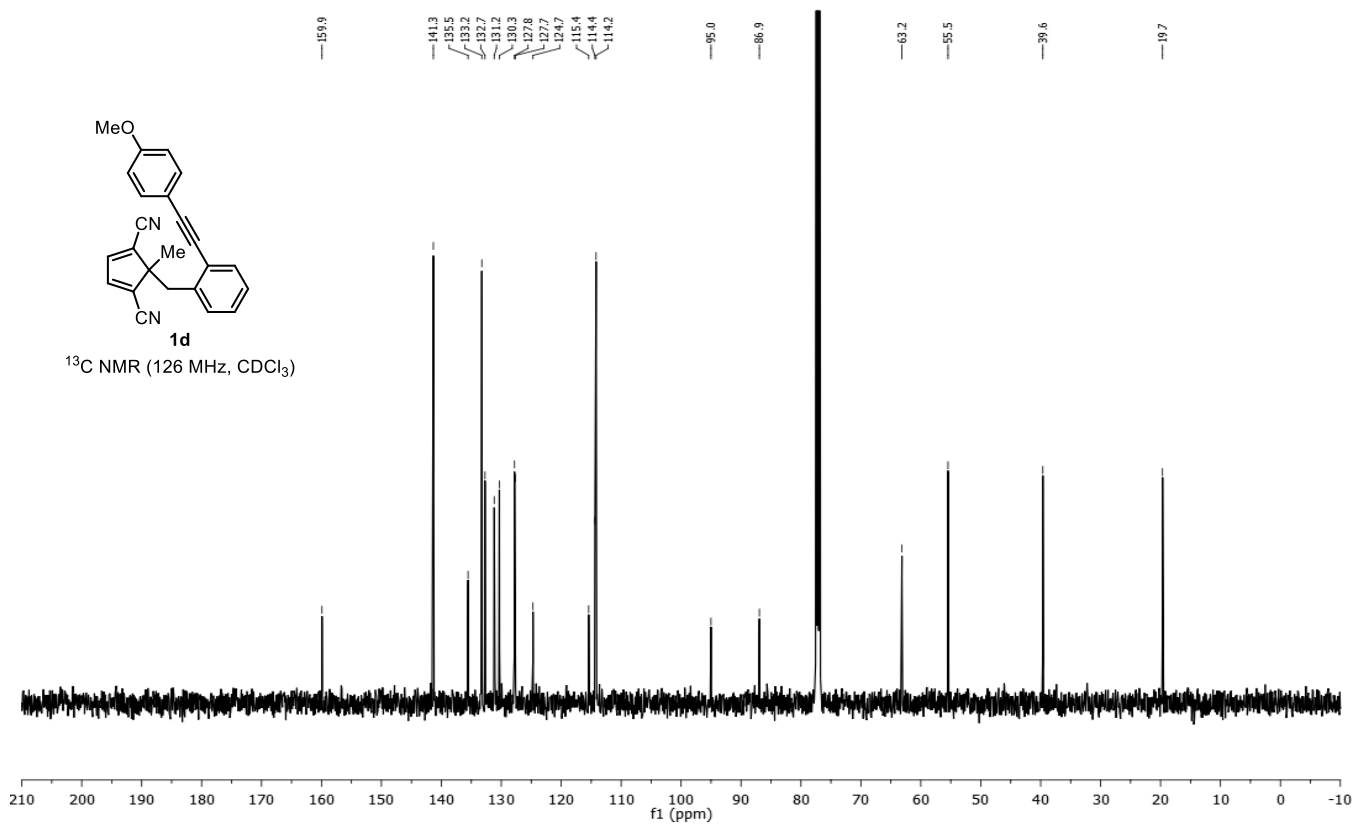

**2-(2-((4-(Benzyloxy)phenyl)ethynyl)benzyl)-2-methylcyclopenta-3,5-diene-1,3-dicarbonitrile (1e):**

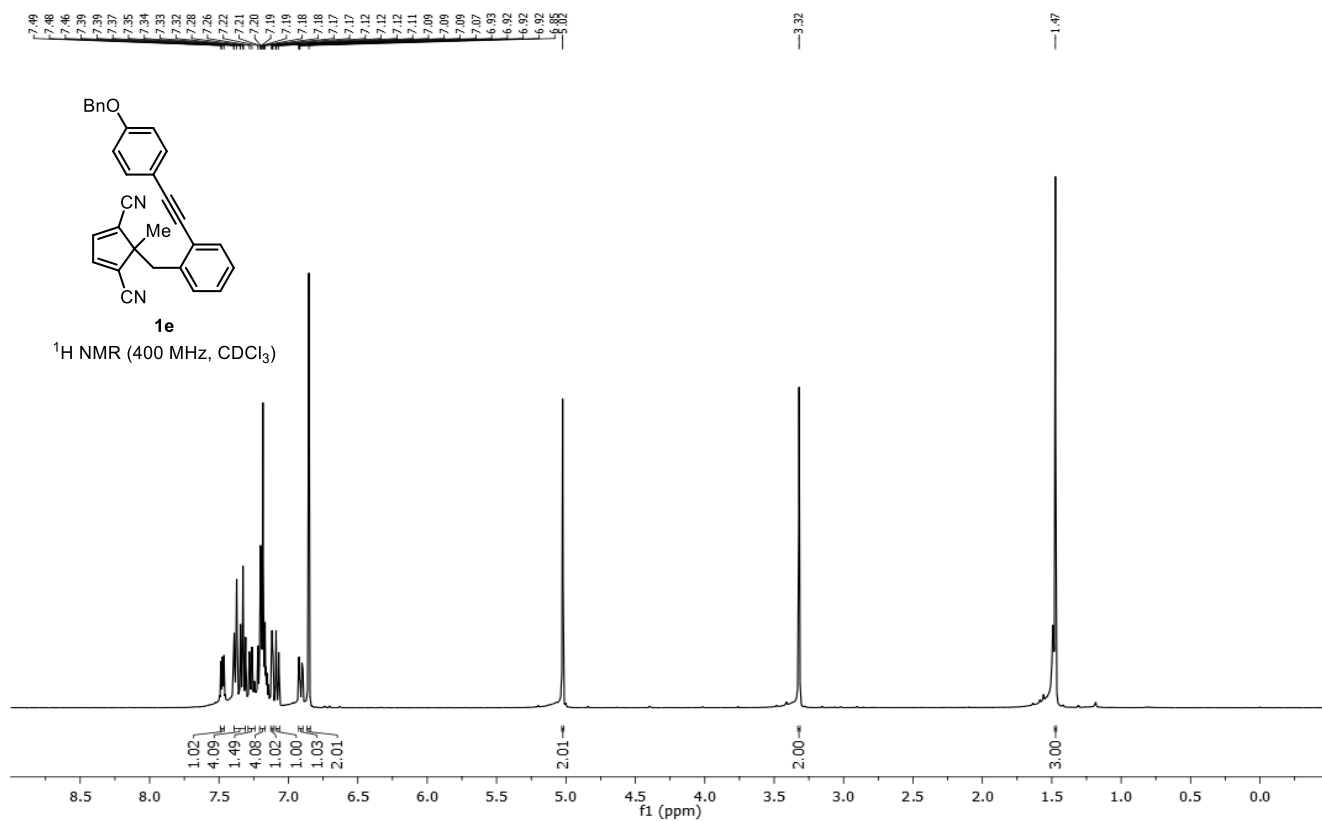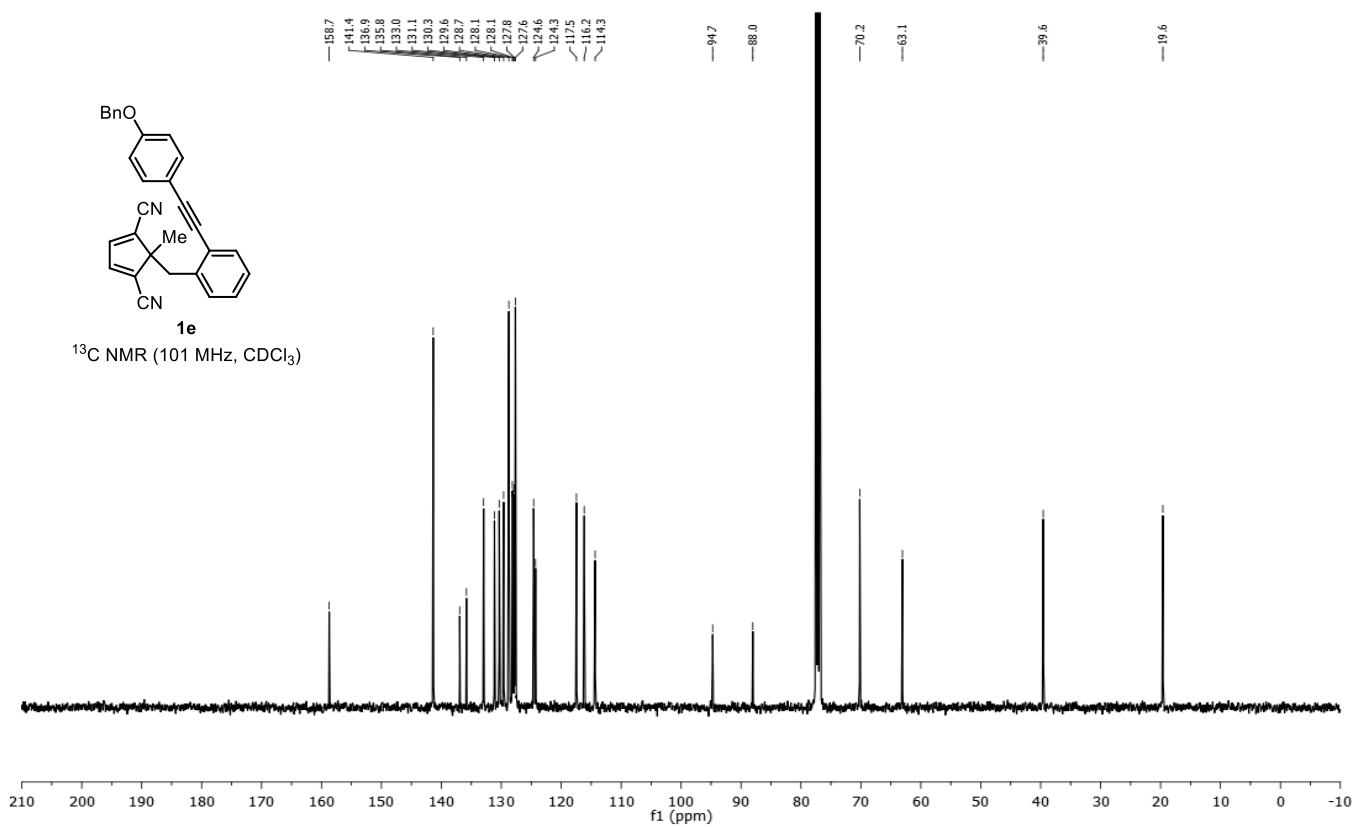

**2-(2-((4-(Allyloxy)phenyl)ethynyl)benzyl)-2-methylcyclopenta-3,5-diene-1,3-dicarbonitrile (1f):**

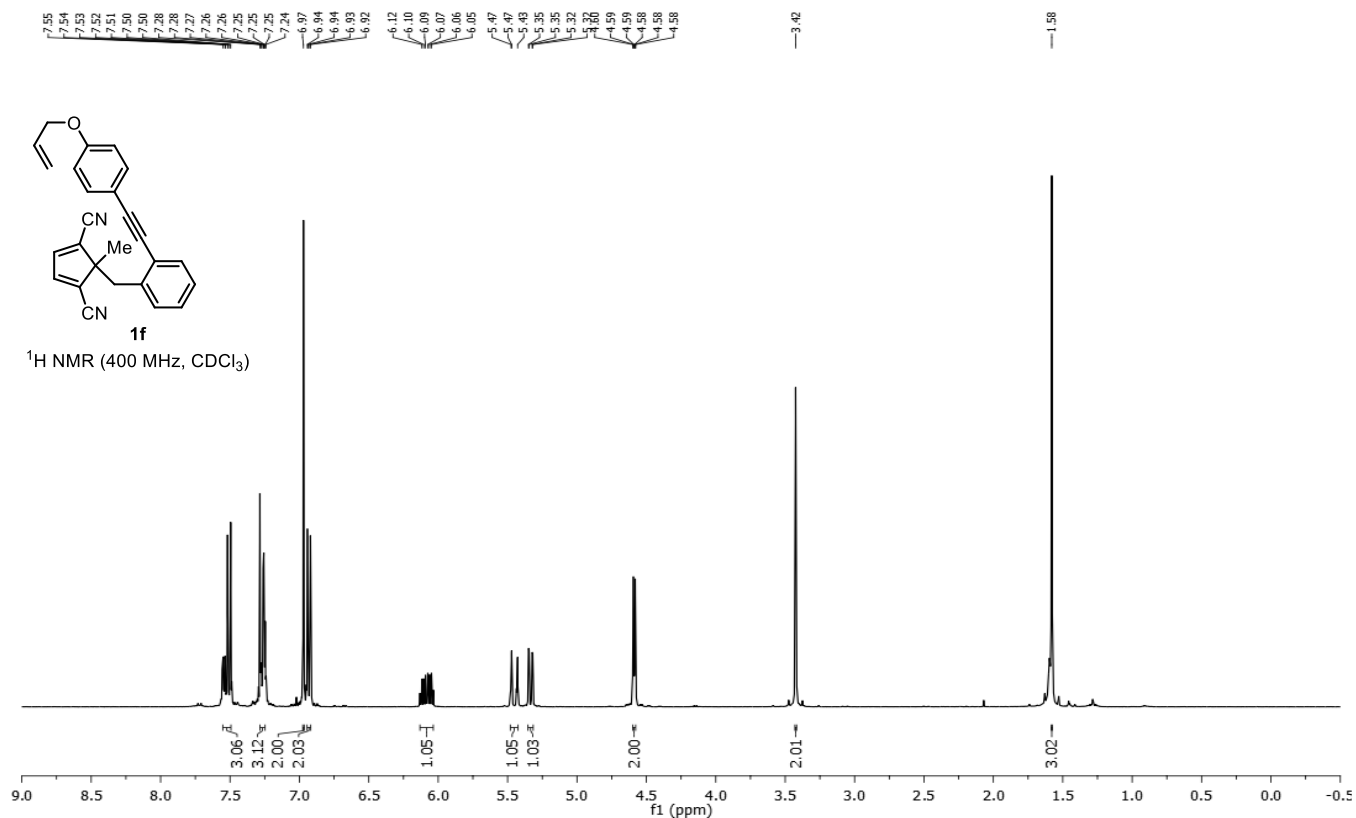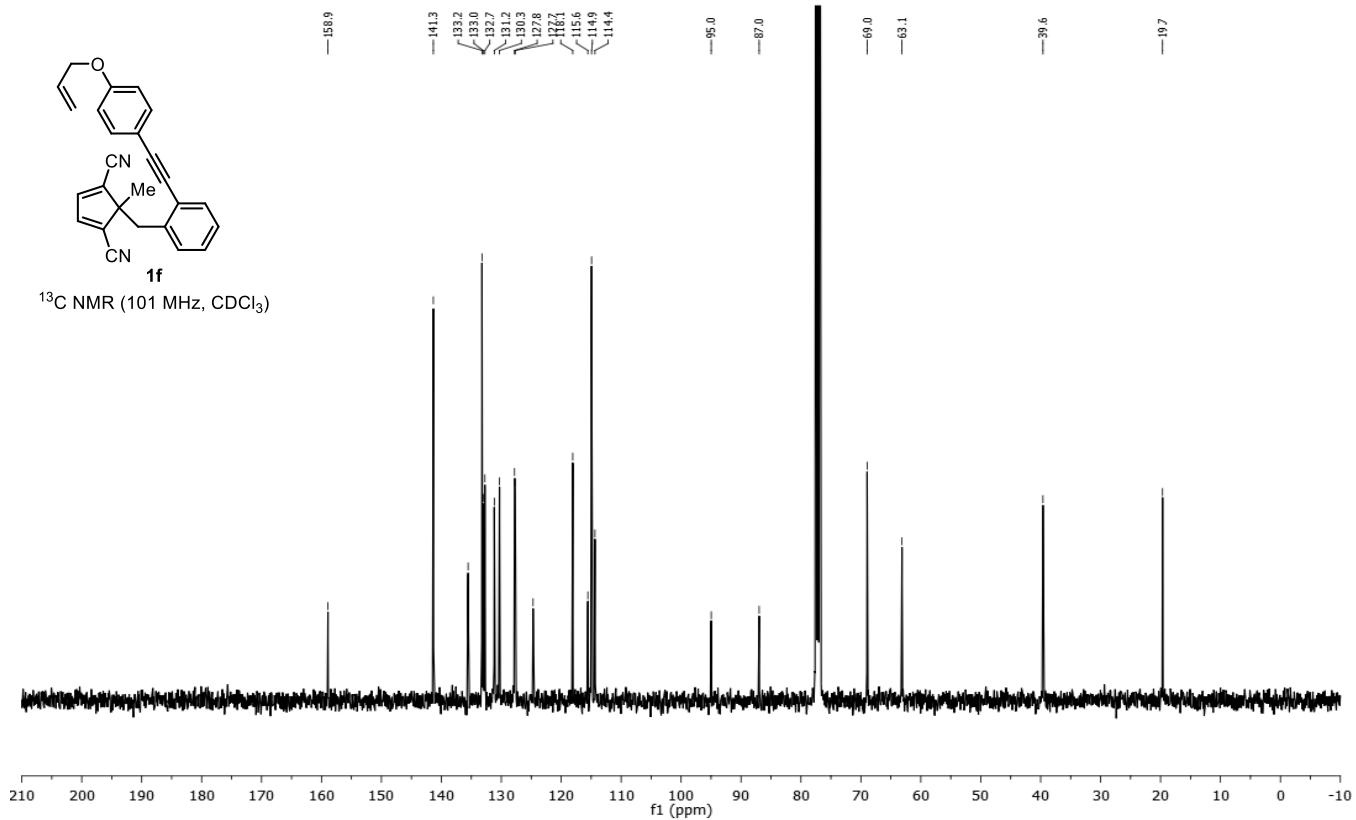

**2-(2-((4-((2-Bromoallyl)oxy)phenyl)ethynyl)benzyl)-2-methylcyclopenta-3,5-diene-1,3-dicarbonitrile (1g):**

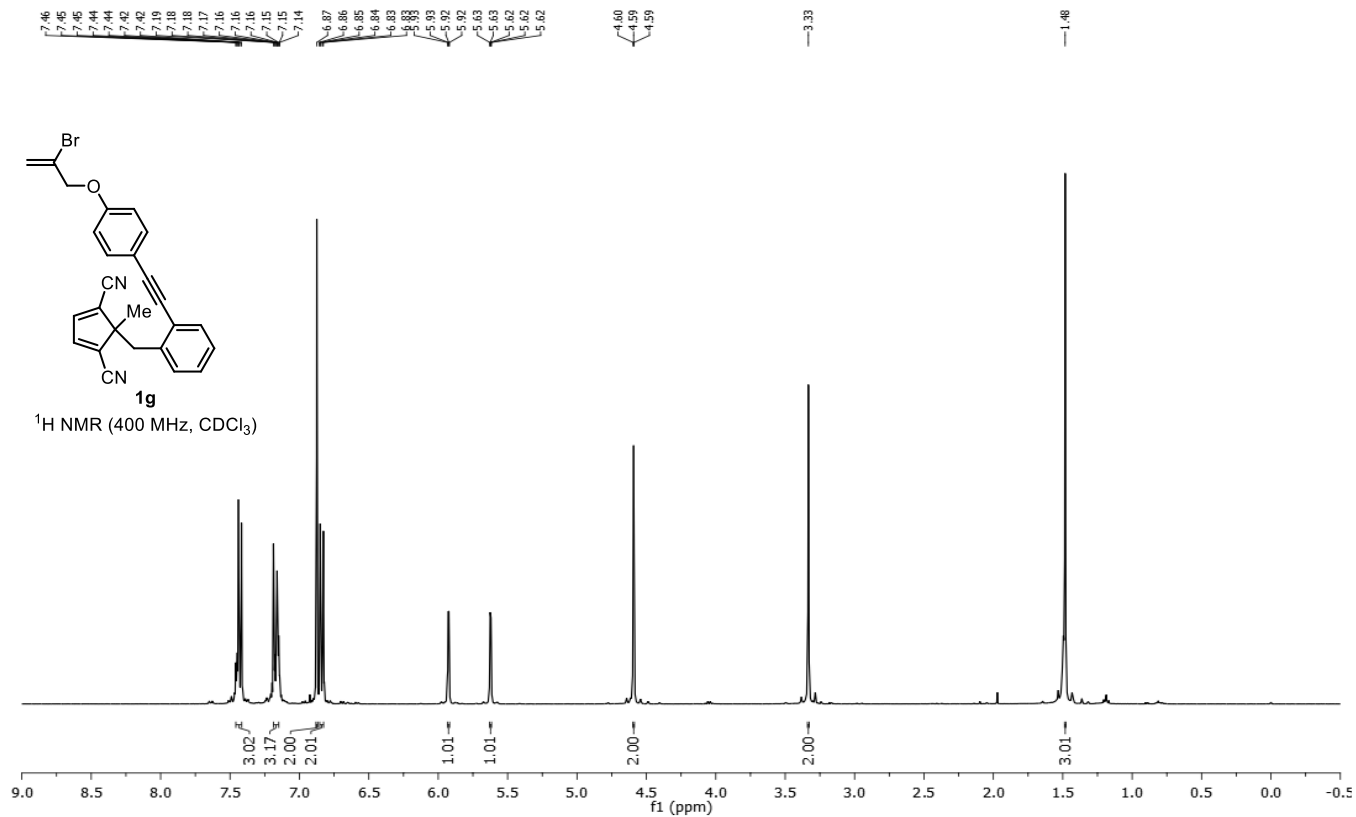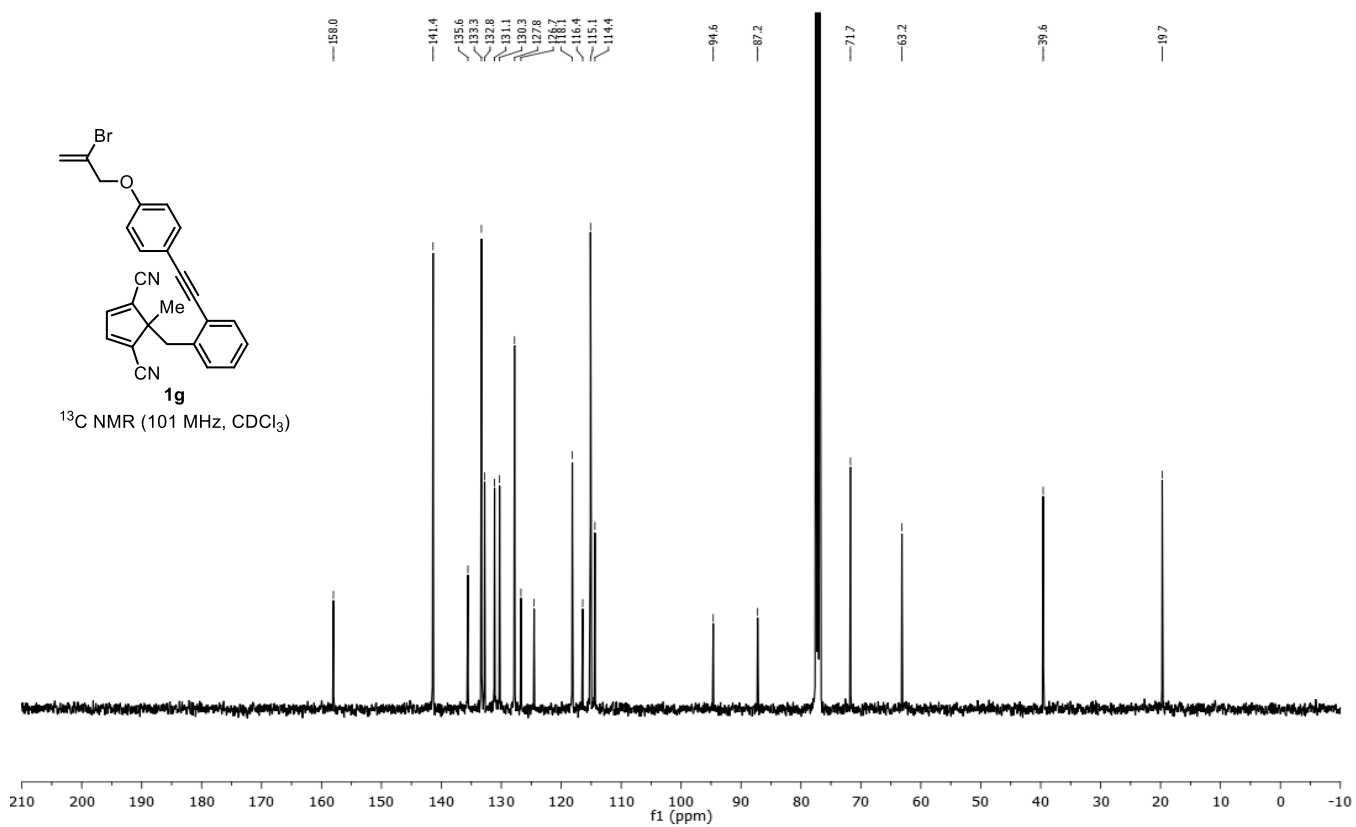

**2-(2-((4-Fluorophenyl)ethynyl)benzyl)-2-methylcyclopenta-3,5-diene-1,3-dicarbonitrile (1h):**

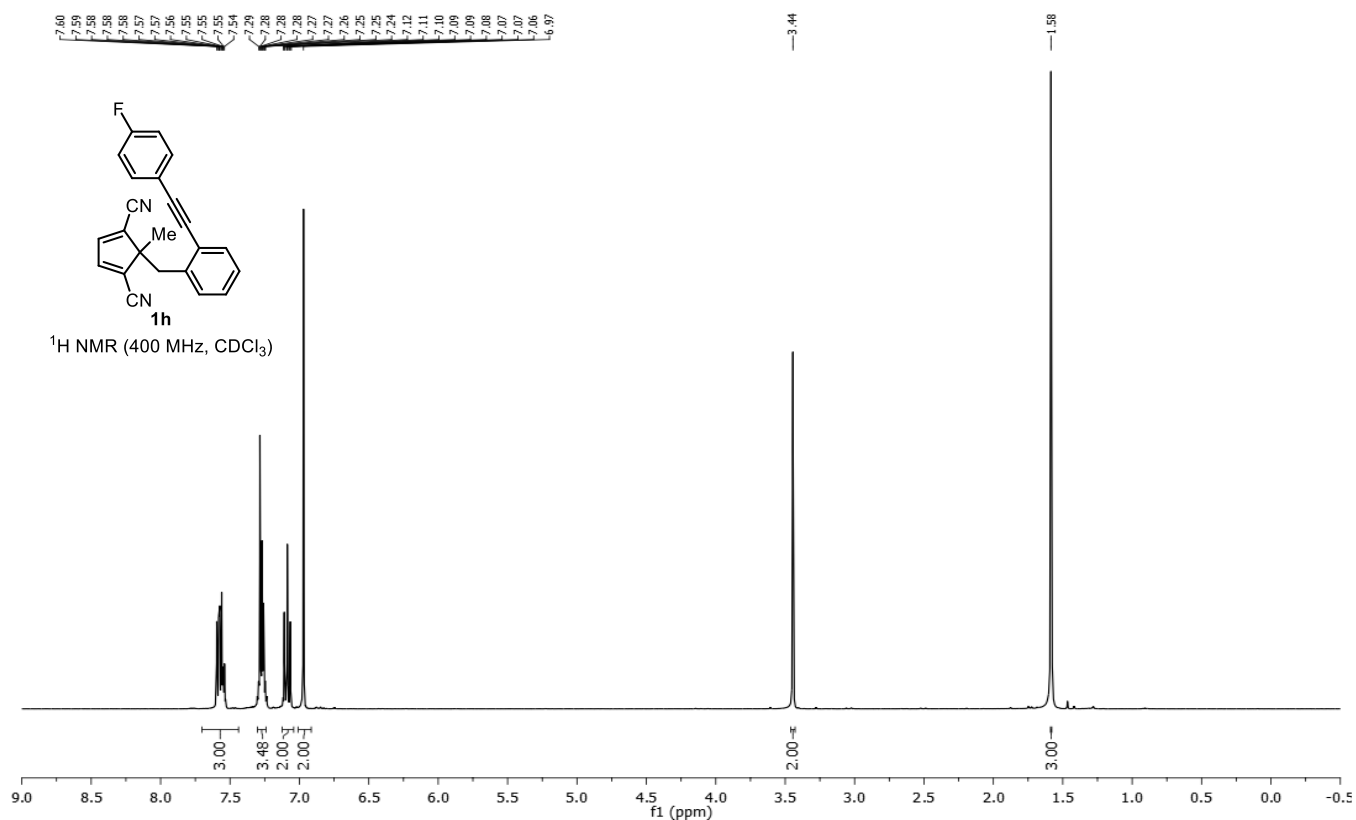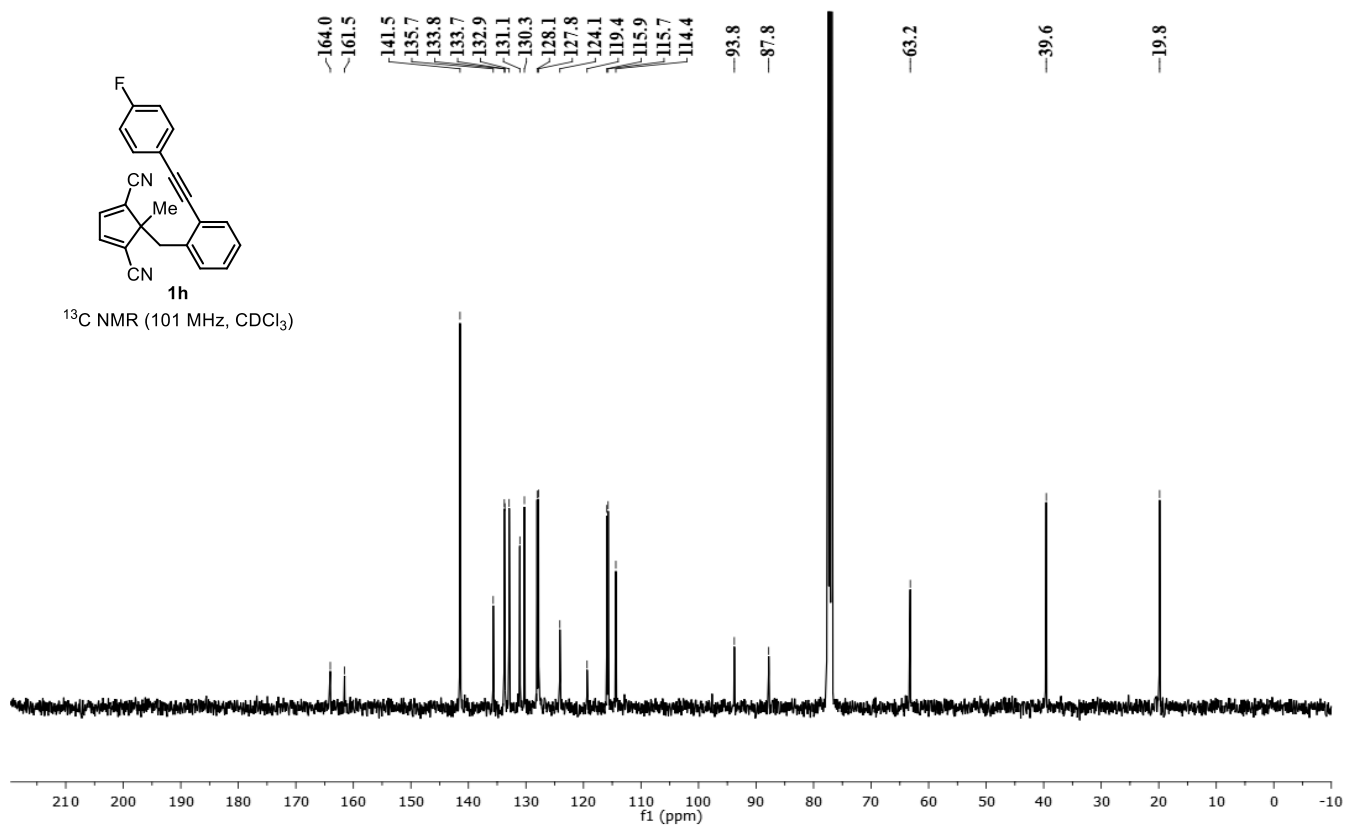

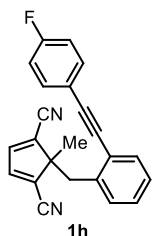

$^{19}\text{F}$  NMR (377 MHz,  $\text{CDCl}_3$ )

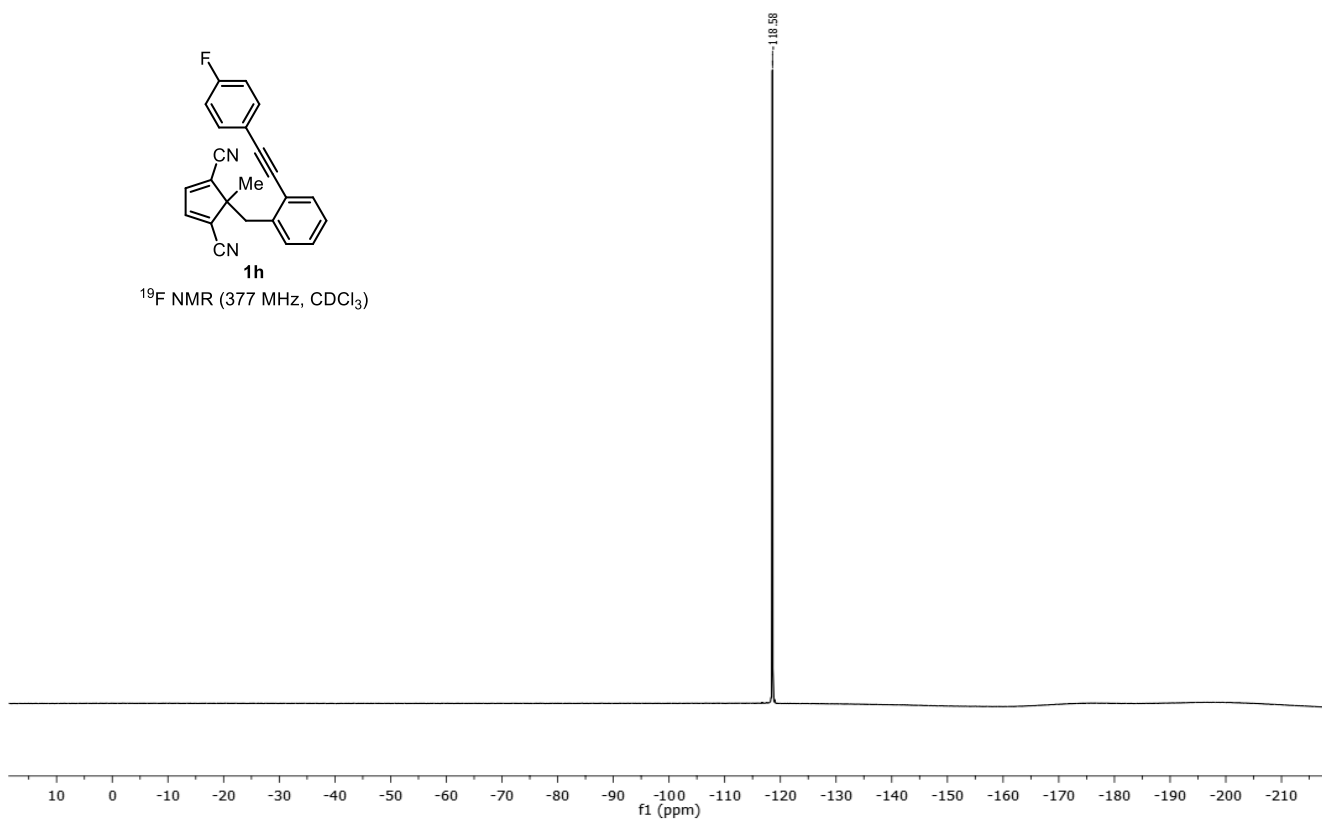

## 2-(2-((4-Chlorophenyl)ethynyl)benzyl)-2-methylcyclopenta-3,5-diene-1,3-dicarbonitrile (**1i**):

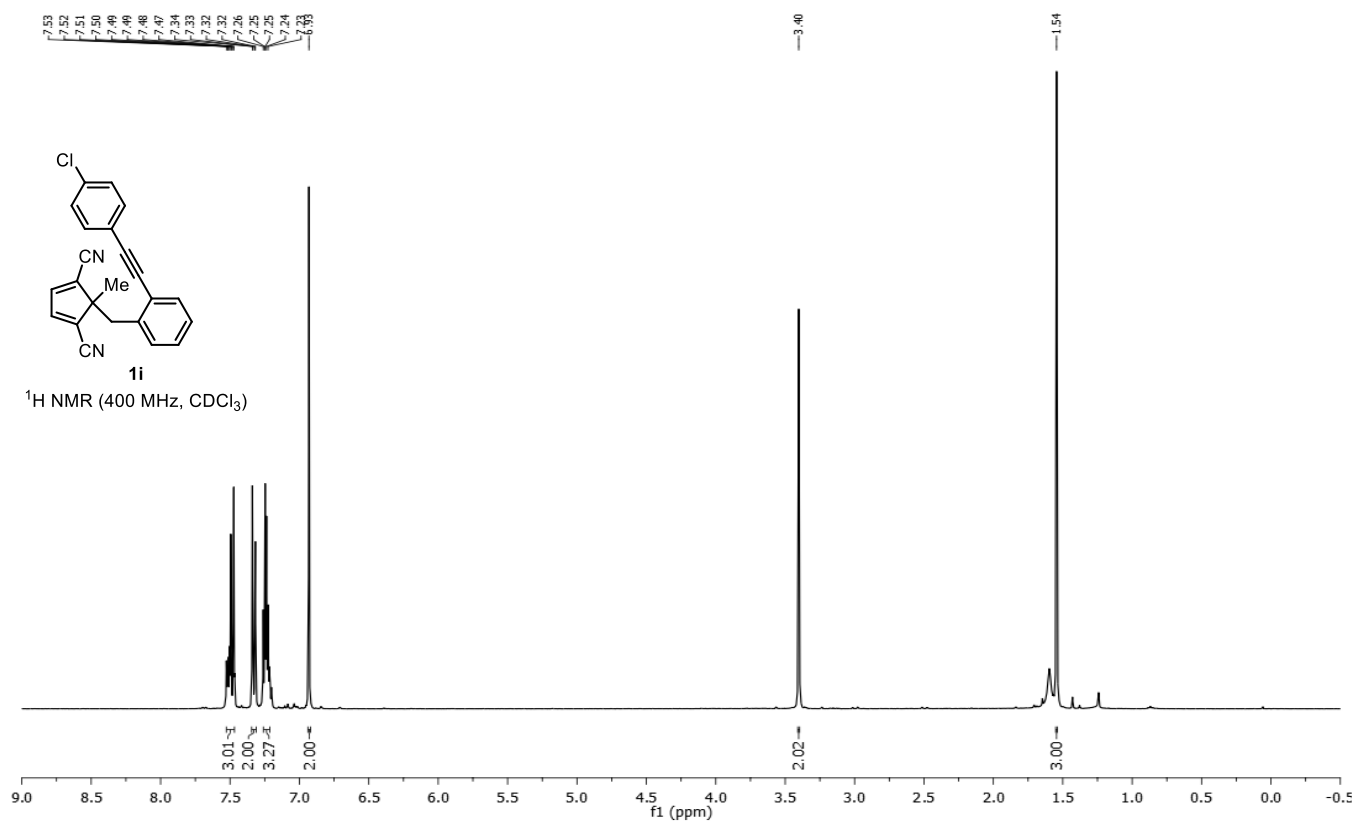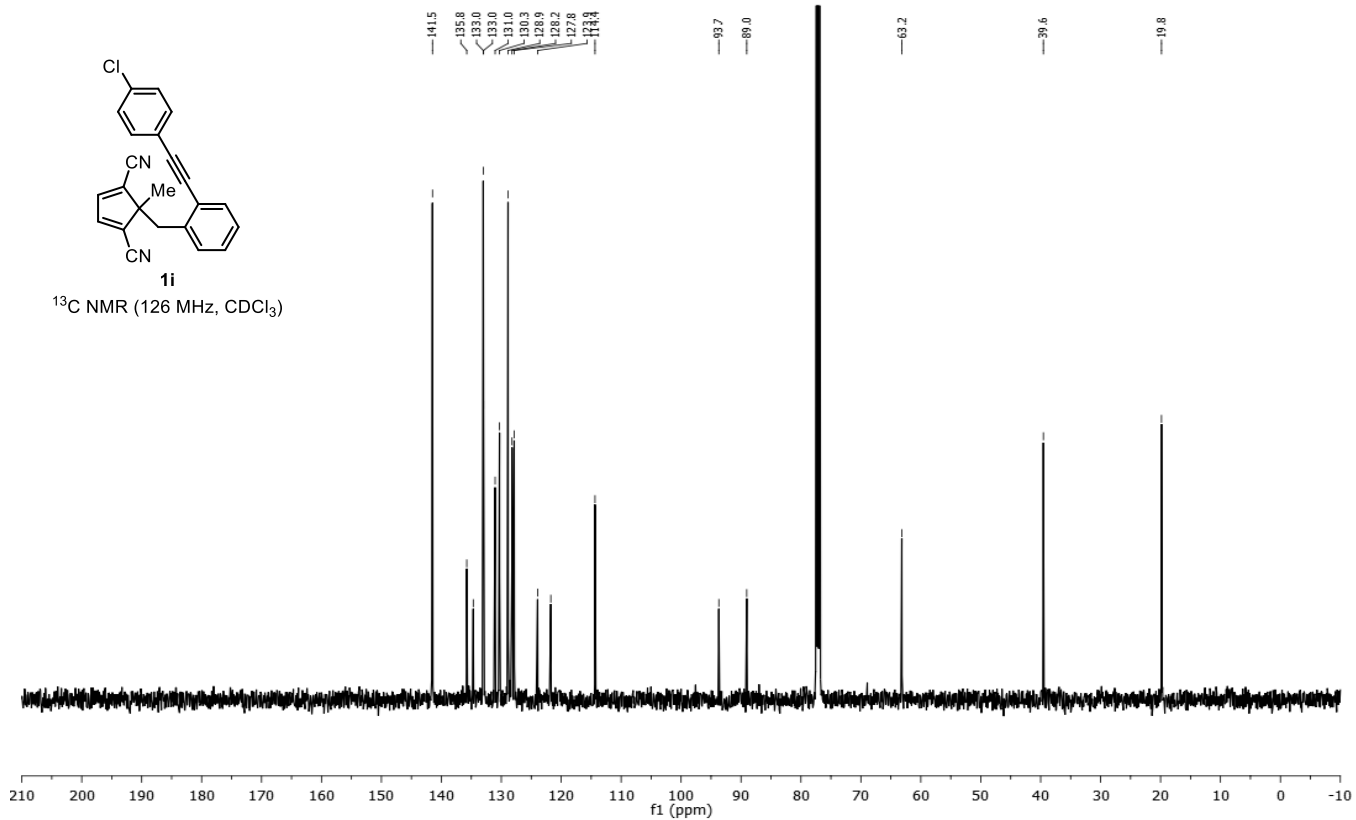

## 2-(2-((4-Bromophenyl)ethynyl)benzyl)-2-methylcyclopenta-3,5-diene-1,3-dicarbonitrile (1j):

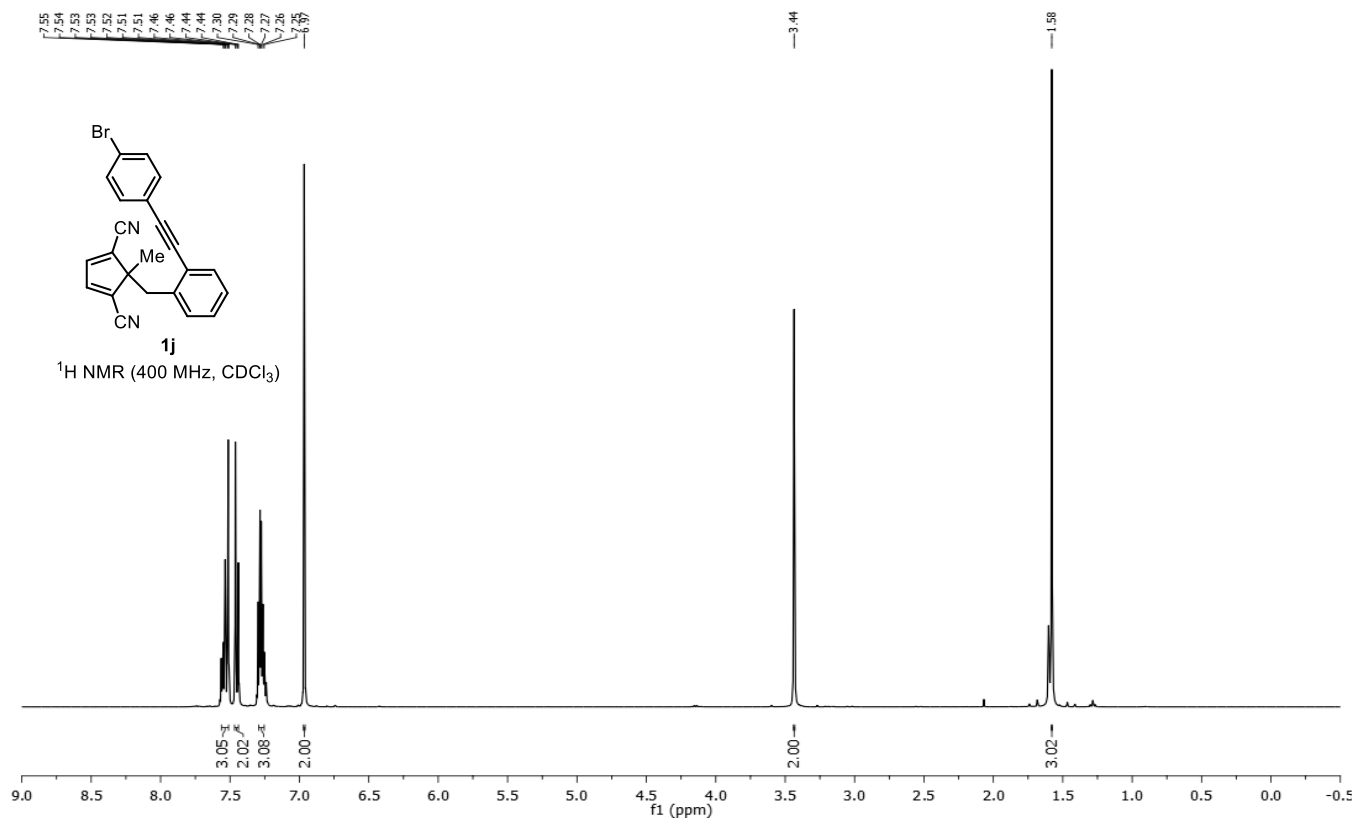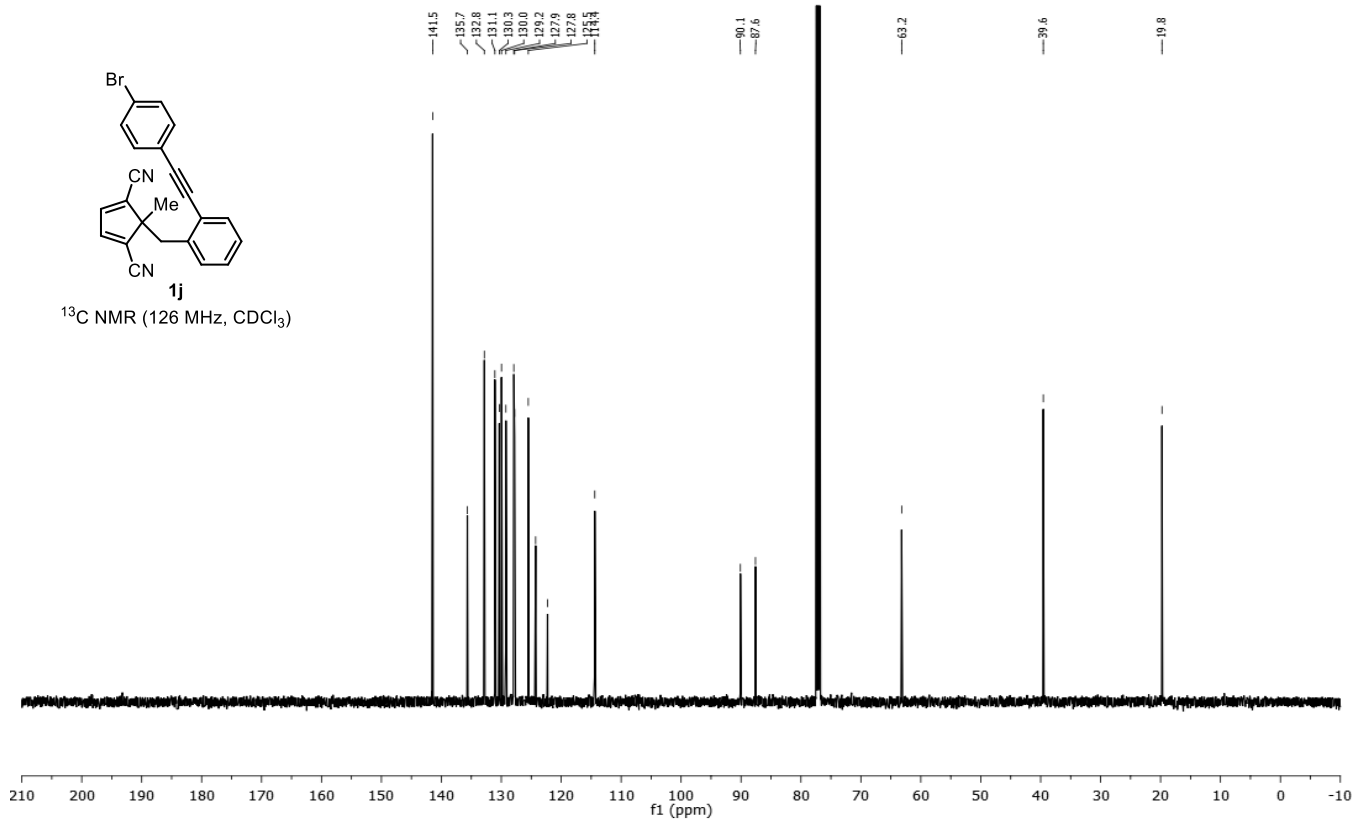



**2-(2-([1,1'-Biphenyl]-4-ylethynyl)benzyl)-2-methylcyclopenta-3,5-diene-1,3-dicarbonitrile (**1k**):**

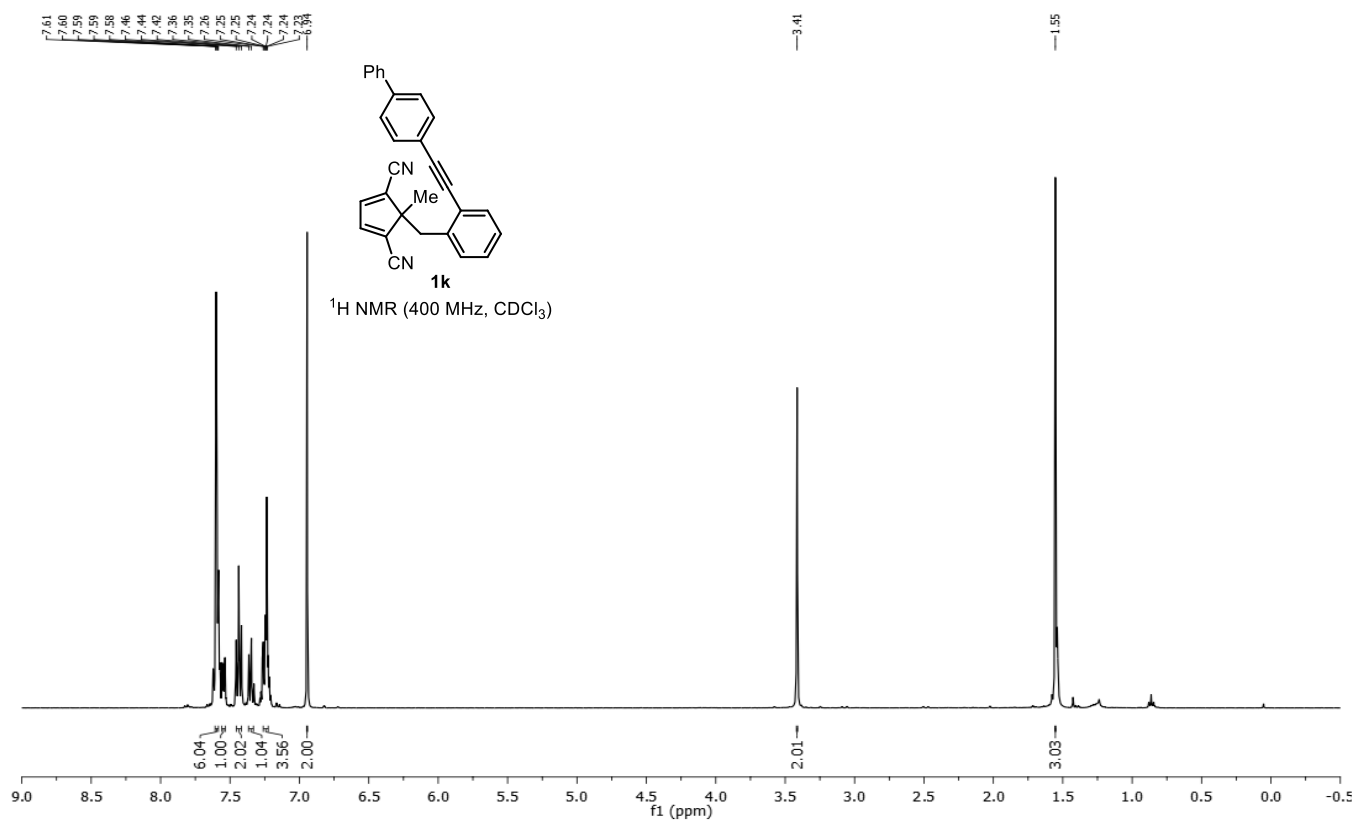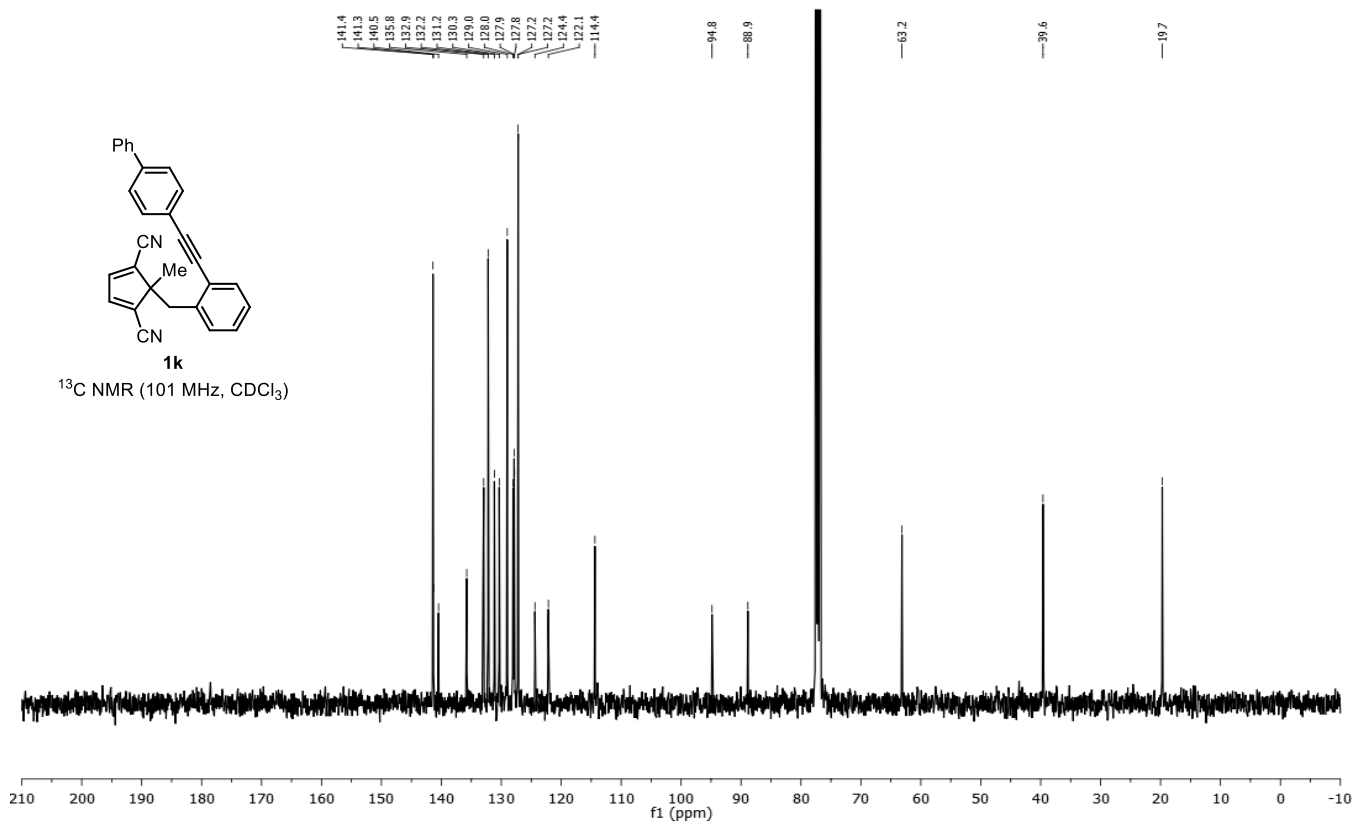

## 2-Methyl-2-((4-phenoxyphenyl)ethynyl)benzyl)cyclopenta-3,5-diene-1,3-dicarbonitrile (11):

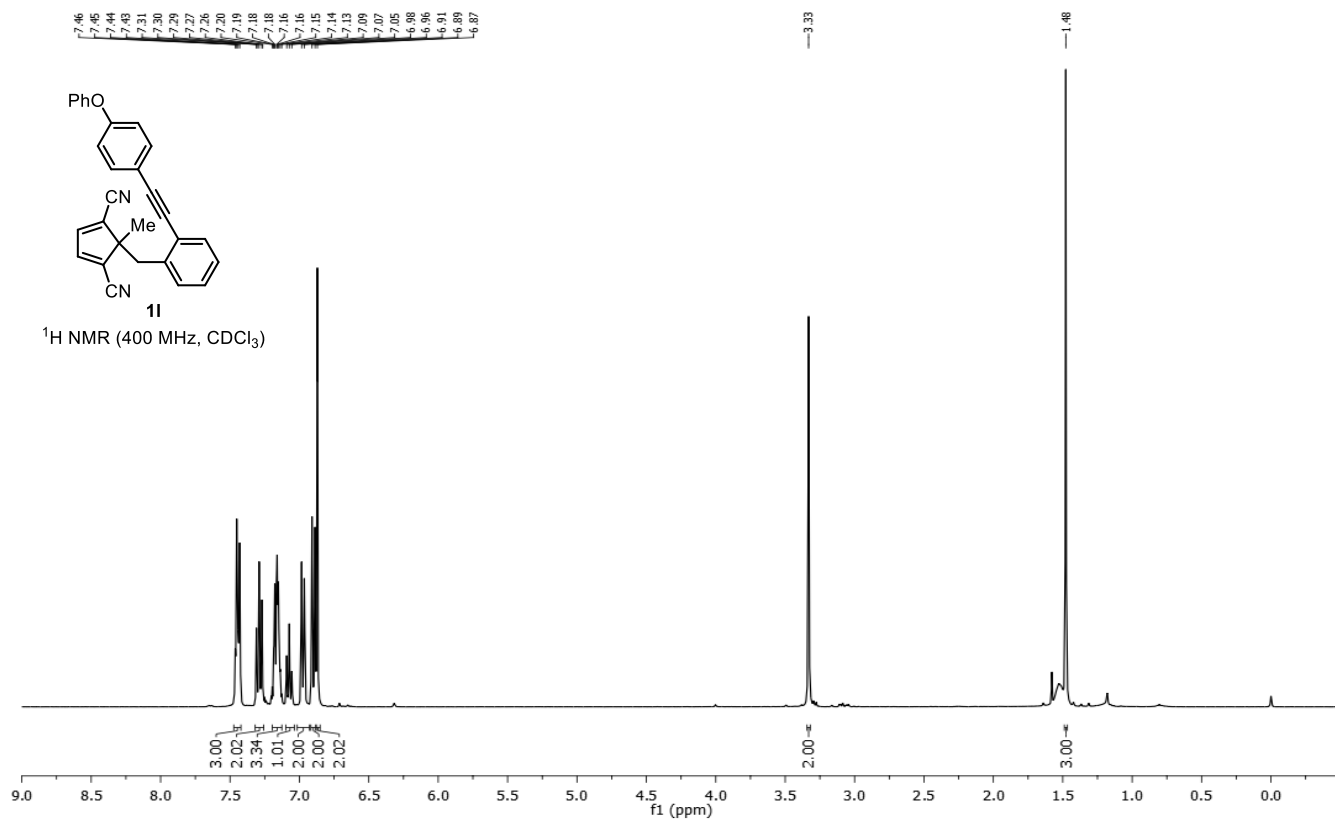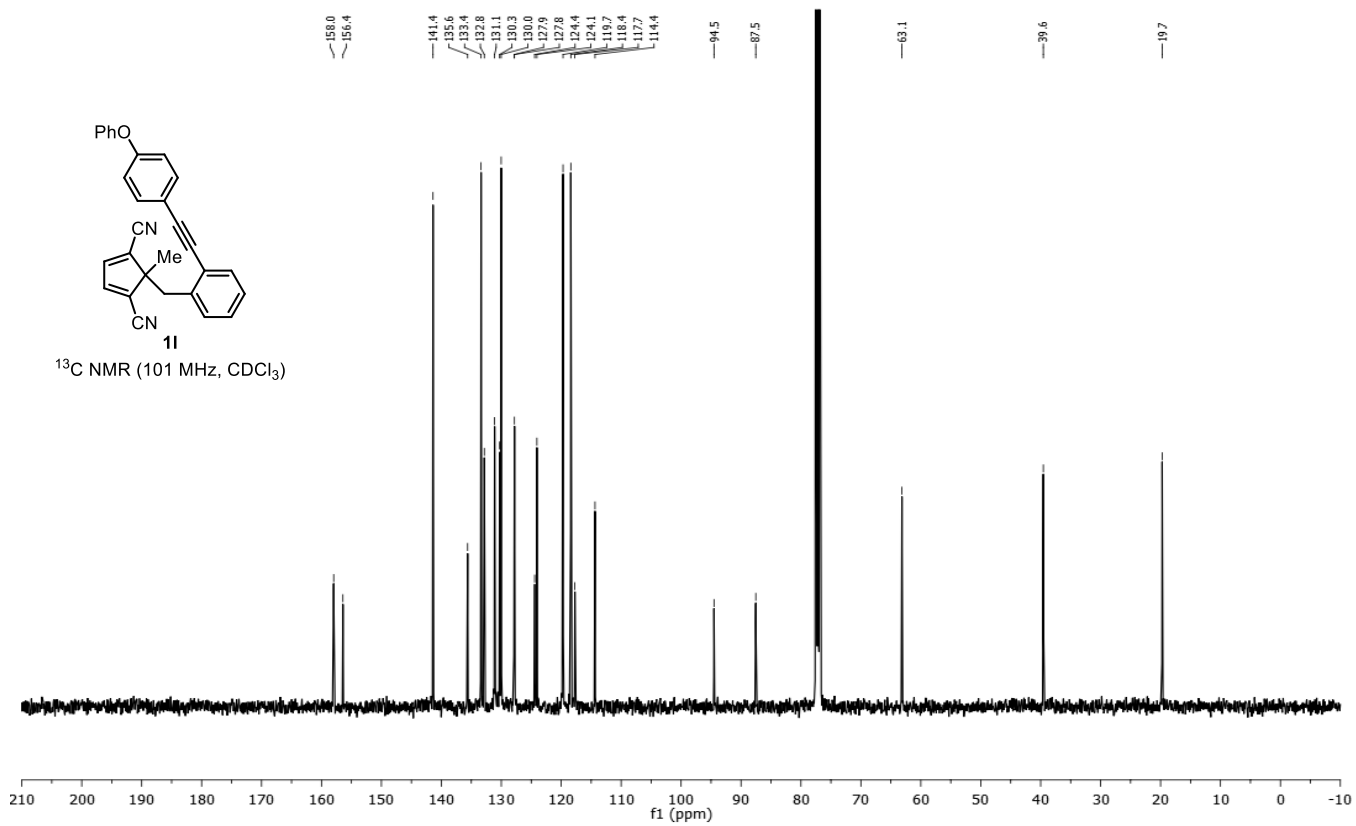

**2-Methyl-2-(2-((4-(trifluoromethyl)phenyl)ethynyl)benzyl)cyclopenta-3,5-diene-1,3-dicarbonitrile (1m):**

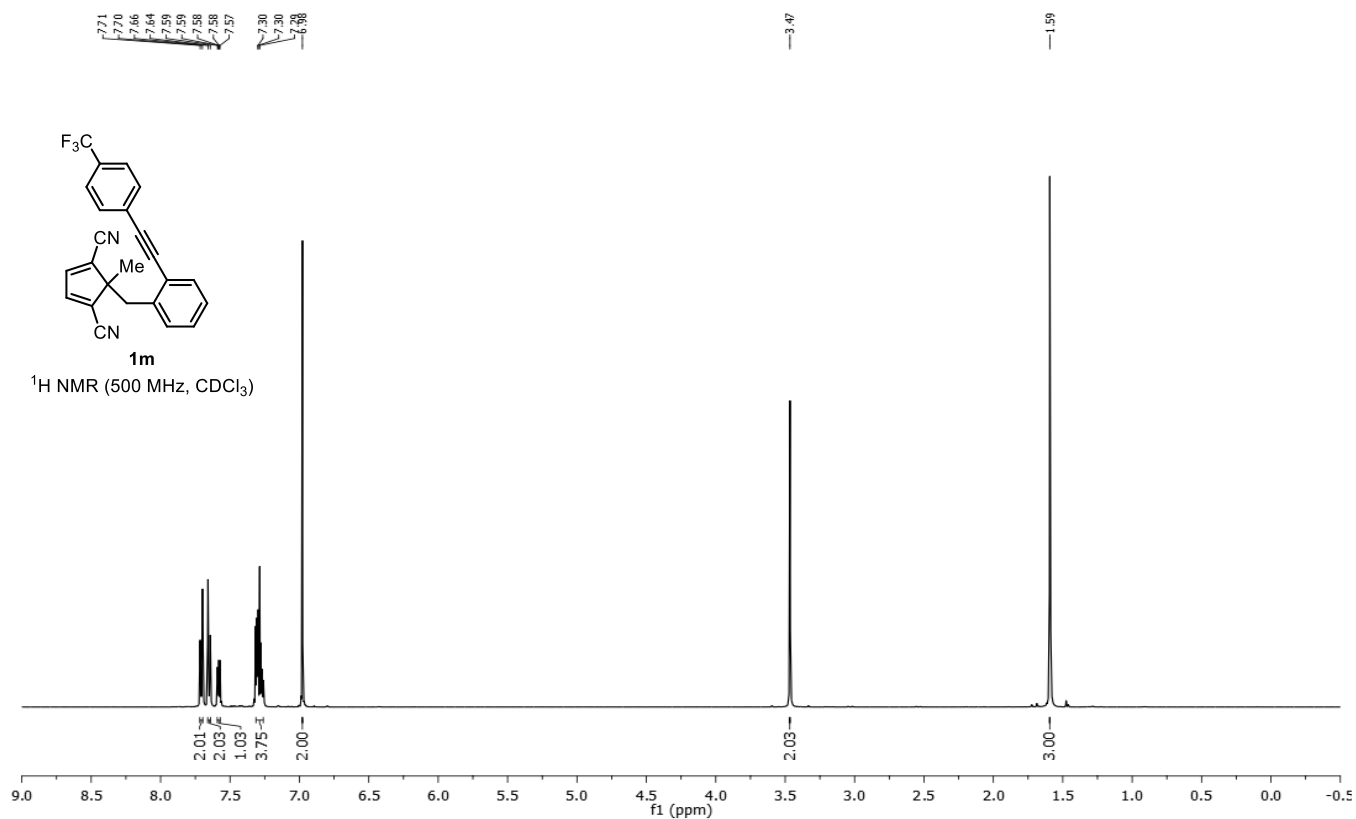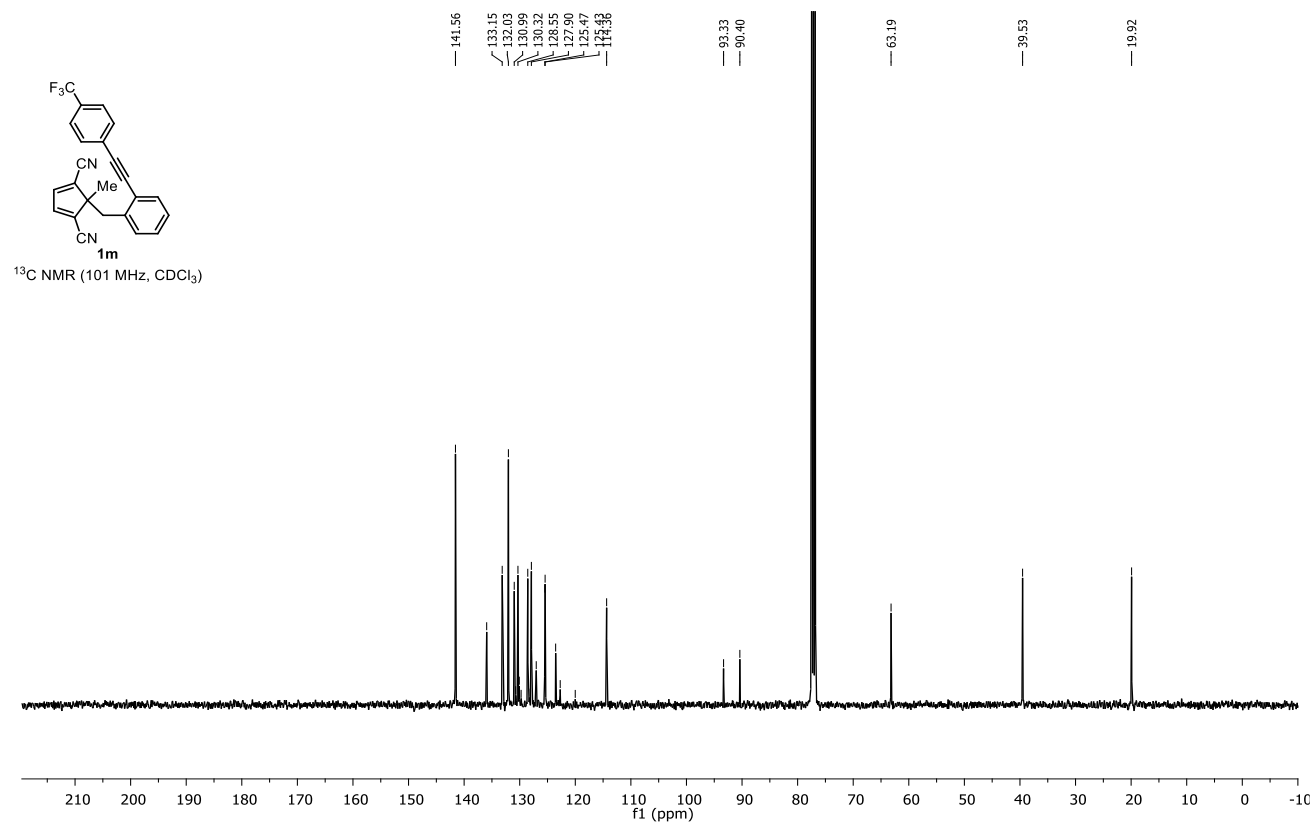

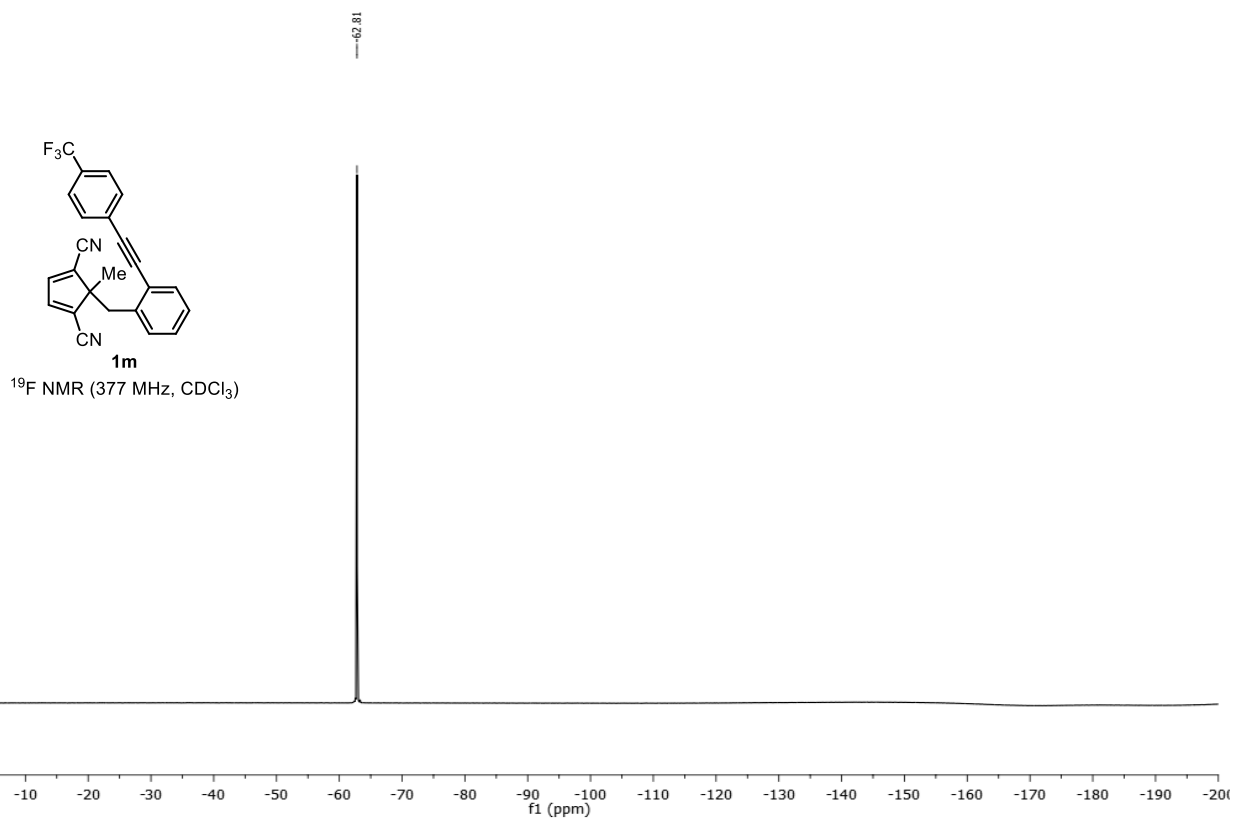

# Methyl 4-((2,5-dicyano-1-methylcyclopenta-2,4-dien-1-yl)methyl)phenyl)ethynyl)benzoate

(1n):

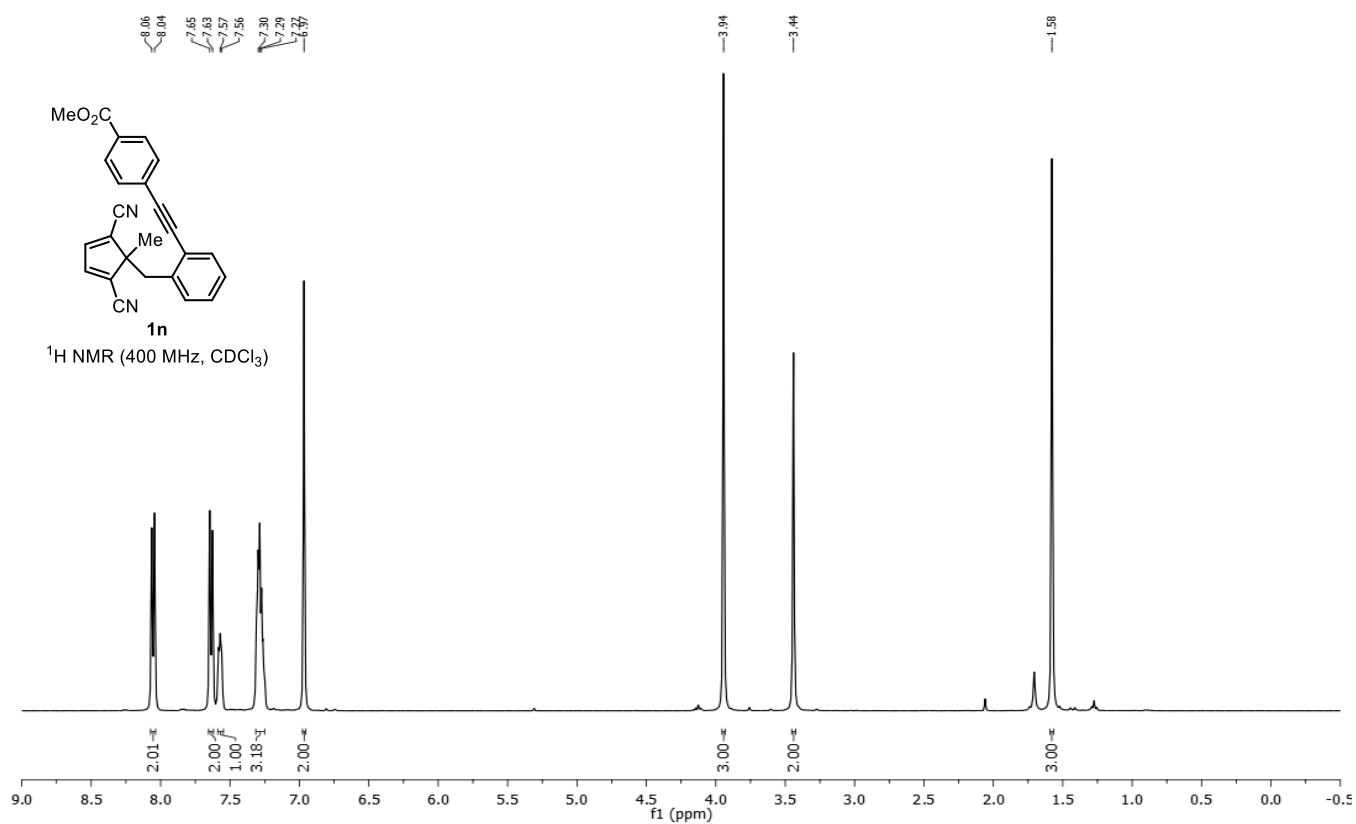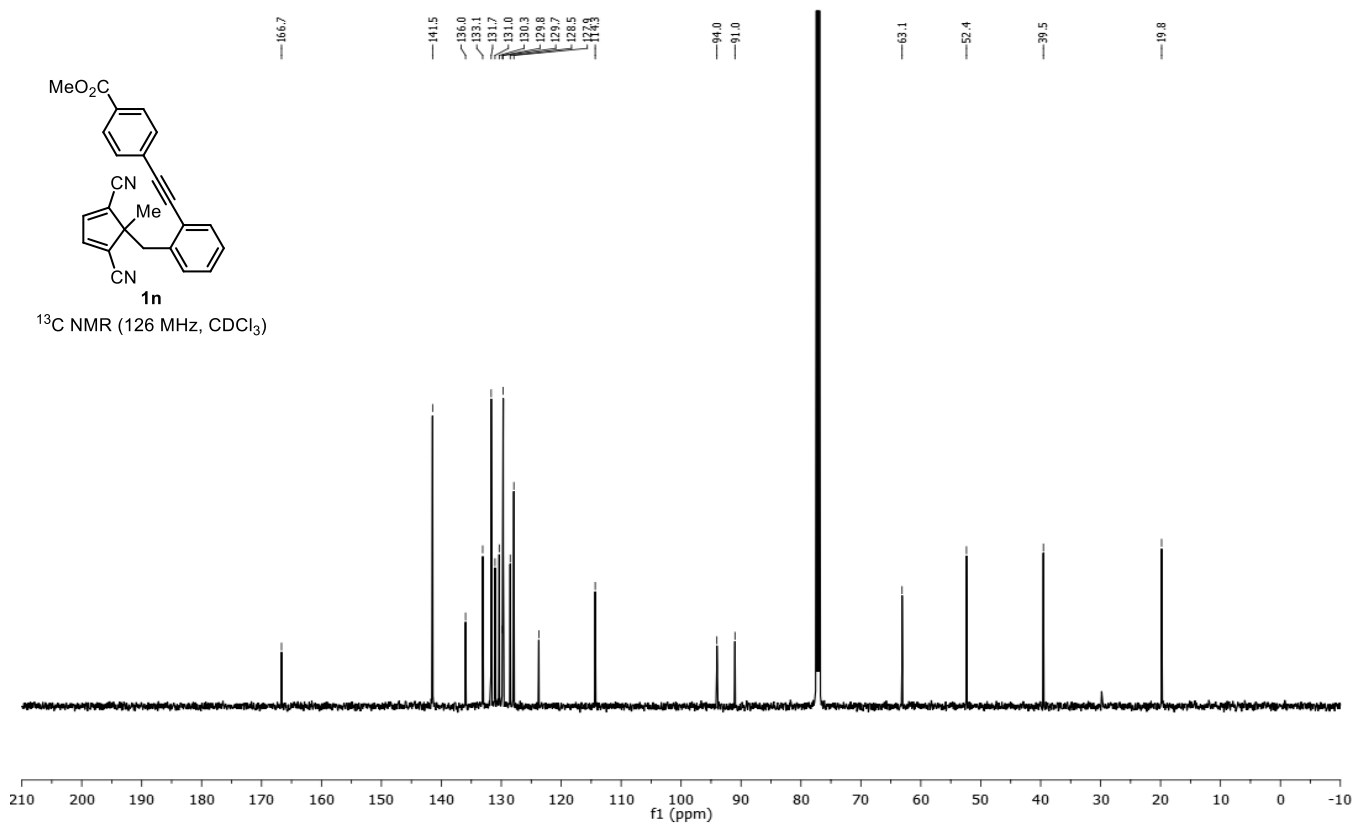

## 2-(2-((4-Cyanophenyl)ethynyl)benzyl)-2-methylcyclopenta-3,5-diene-1,3-dicarbonitrile (**1o**):

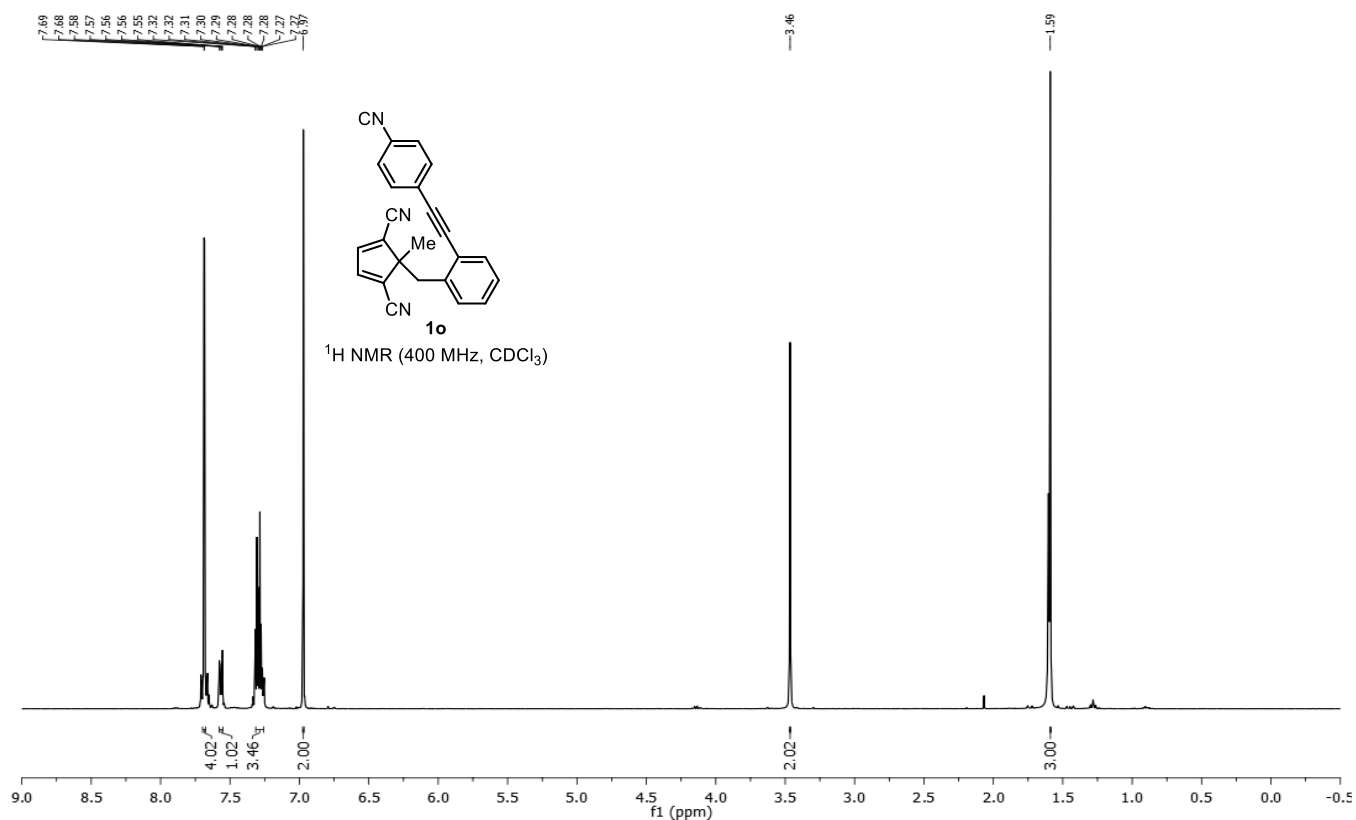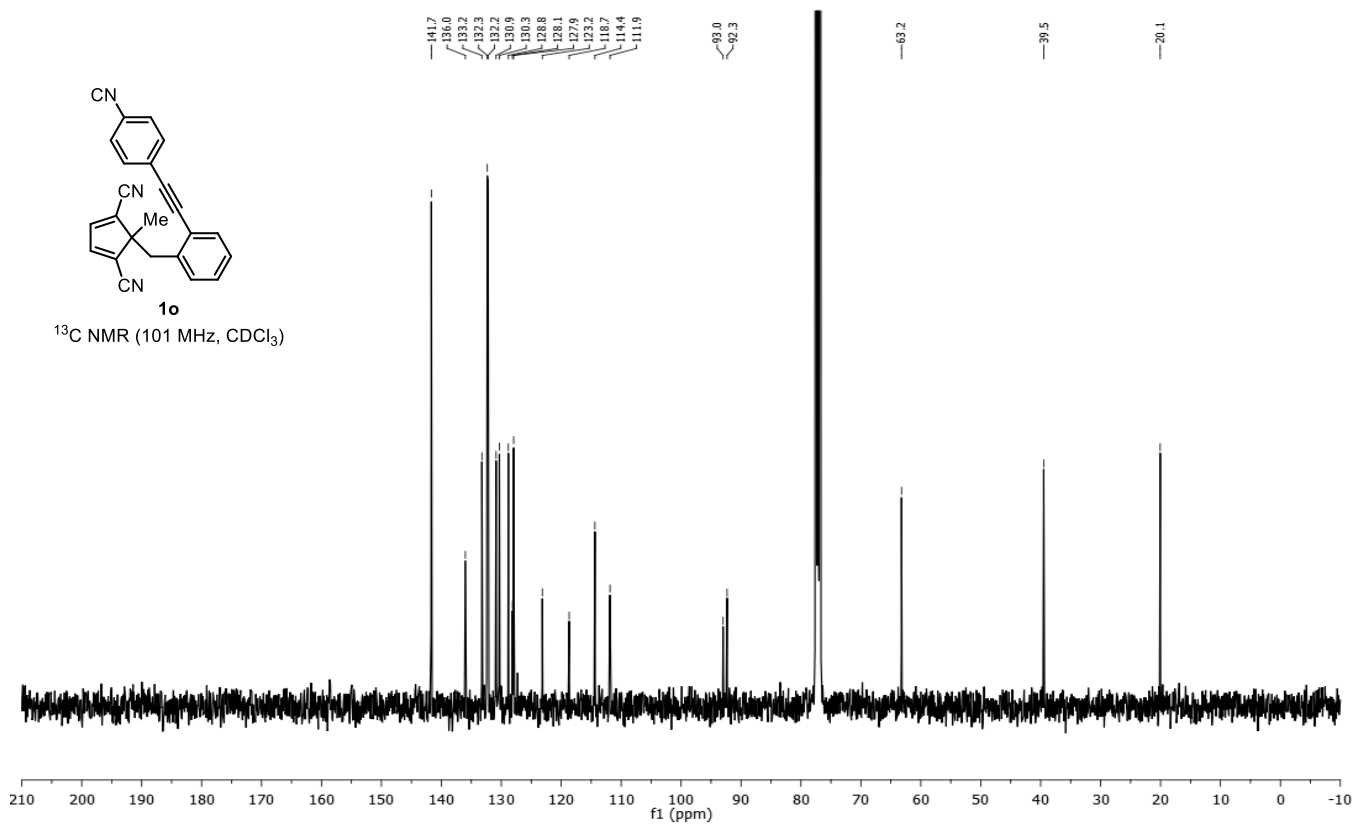

## 2-(2-((3-Chlorophenyl)ethynyl)benzyl)-2-methylcyclopenta-3,5-diene-1,3-dicarbonitrile (1p):

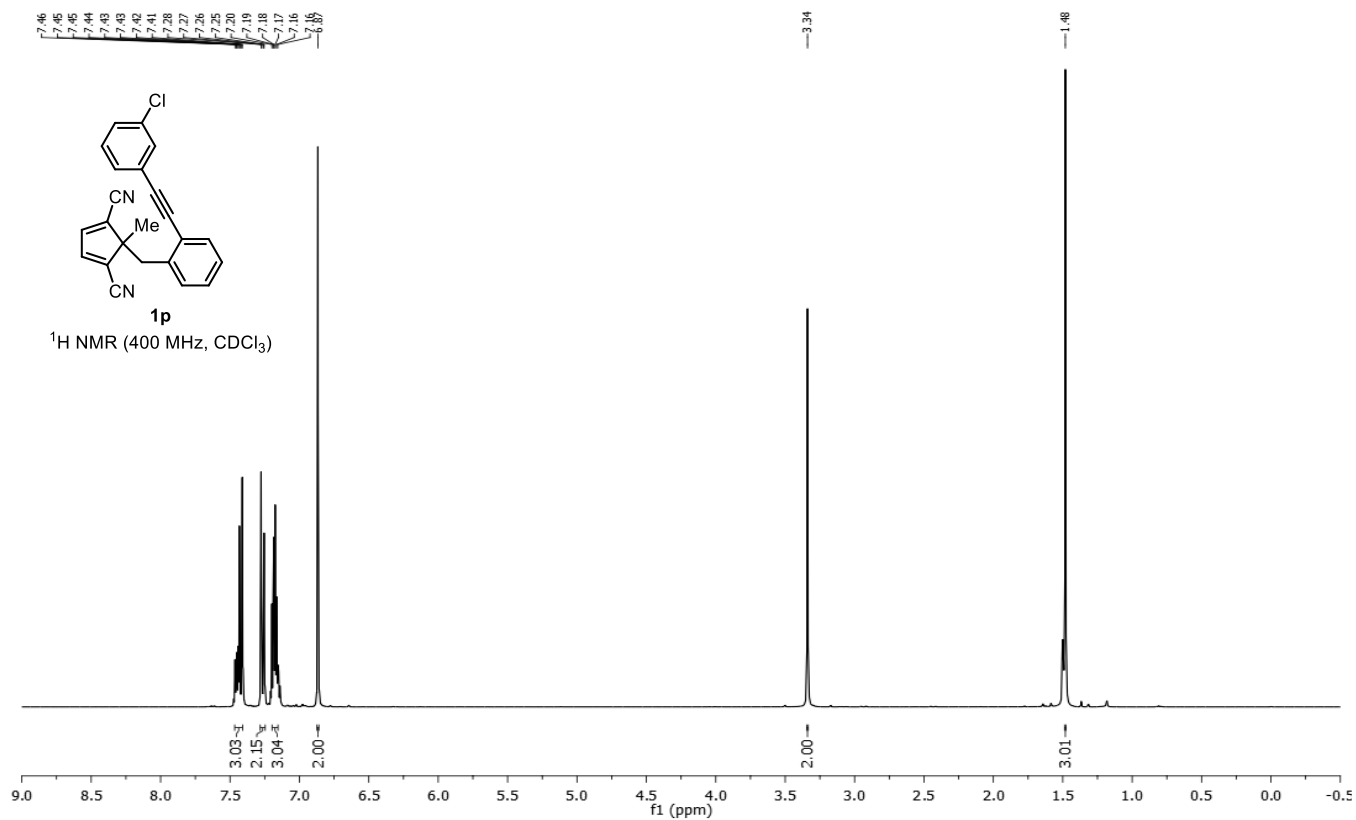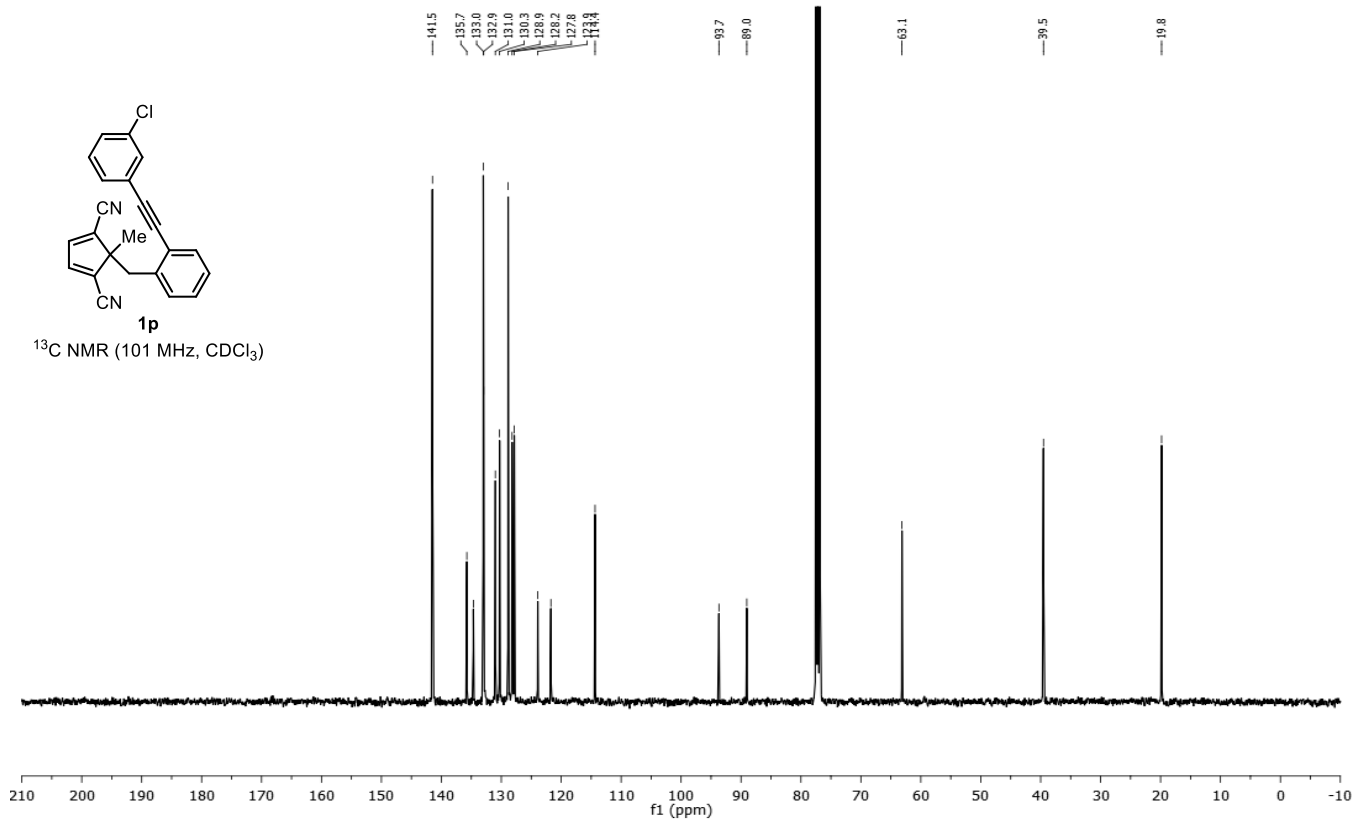

## 2-Methyl-2-(2-(m-tolylethynyl)benzyl)cyclopenta-3,5-diene-1,3-dicarbonitrile (**1q**):

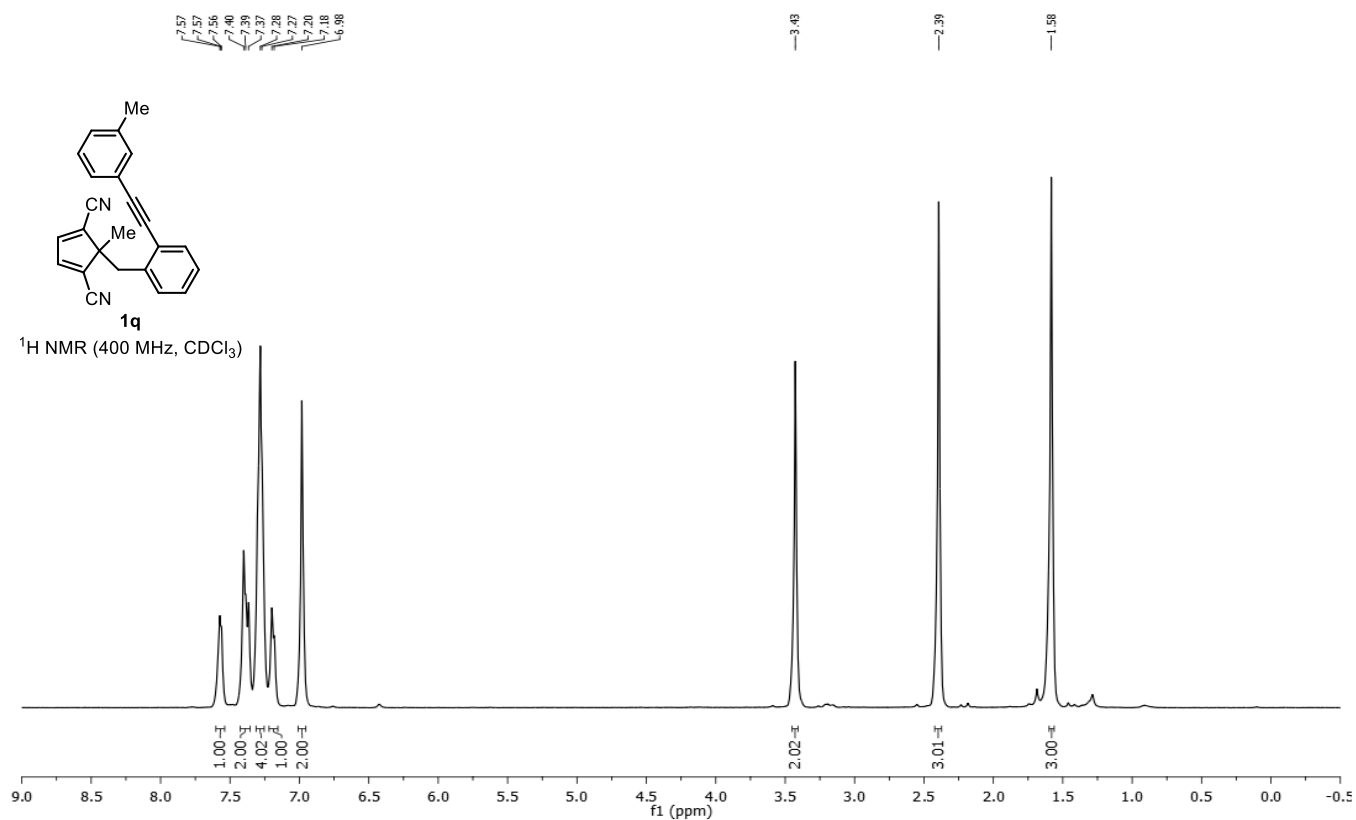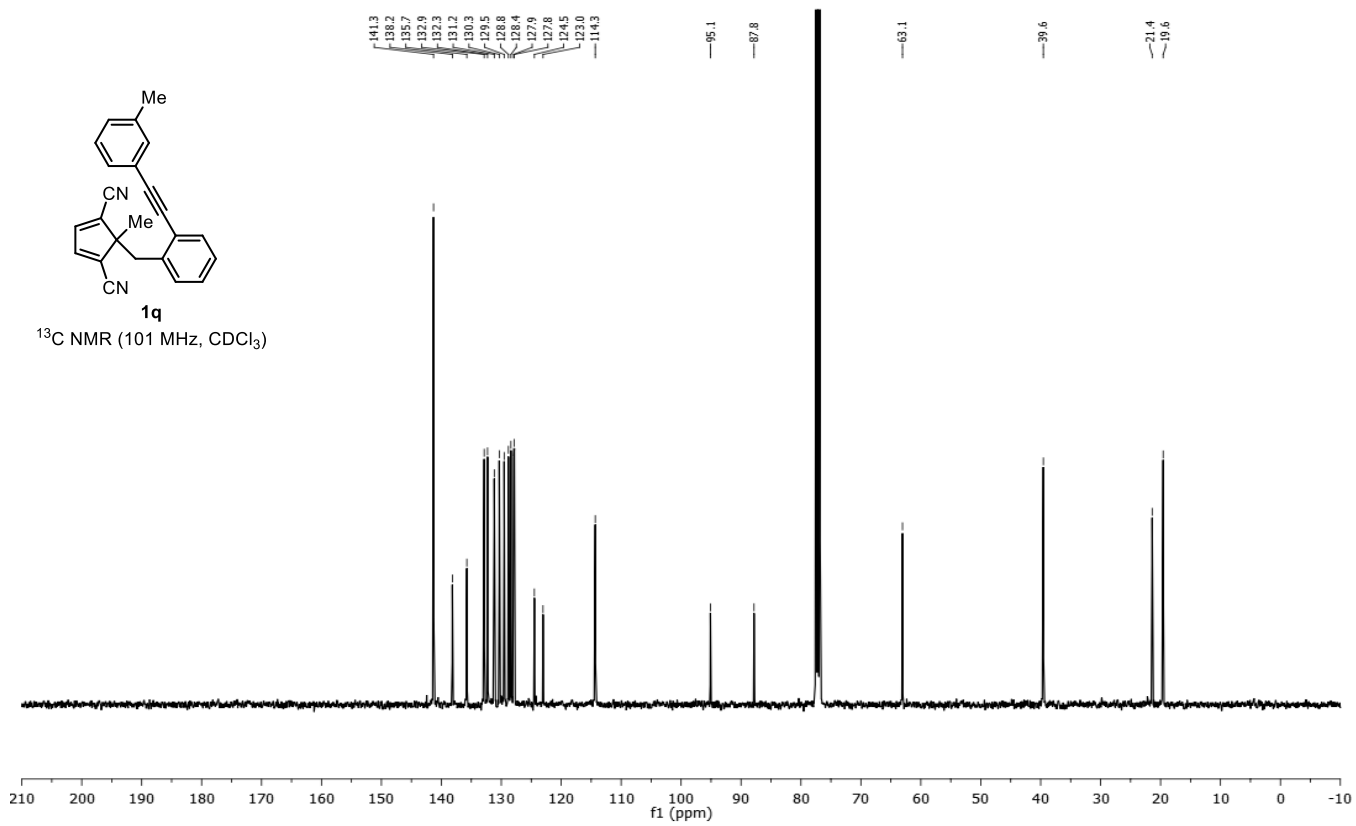



## 2-(2-((3,4-Dichlorophenyl)ethynyl)benzyl)-2-methylcyclopenta-3,5-diene-1,3-dicarbonitrile (1r):

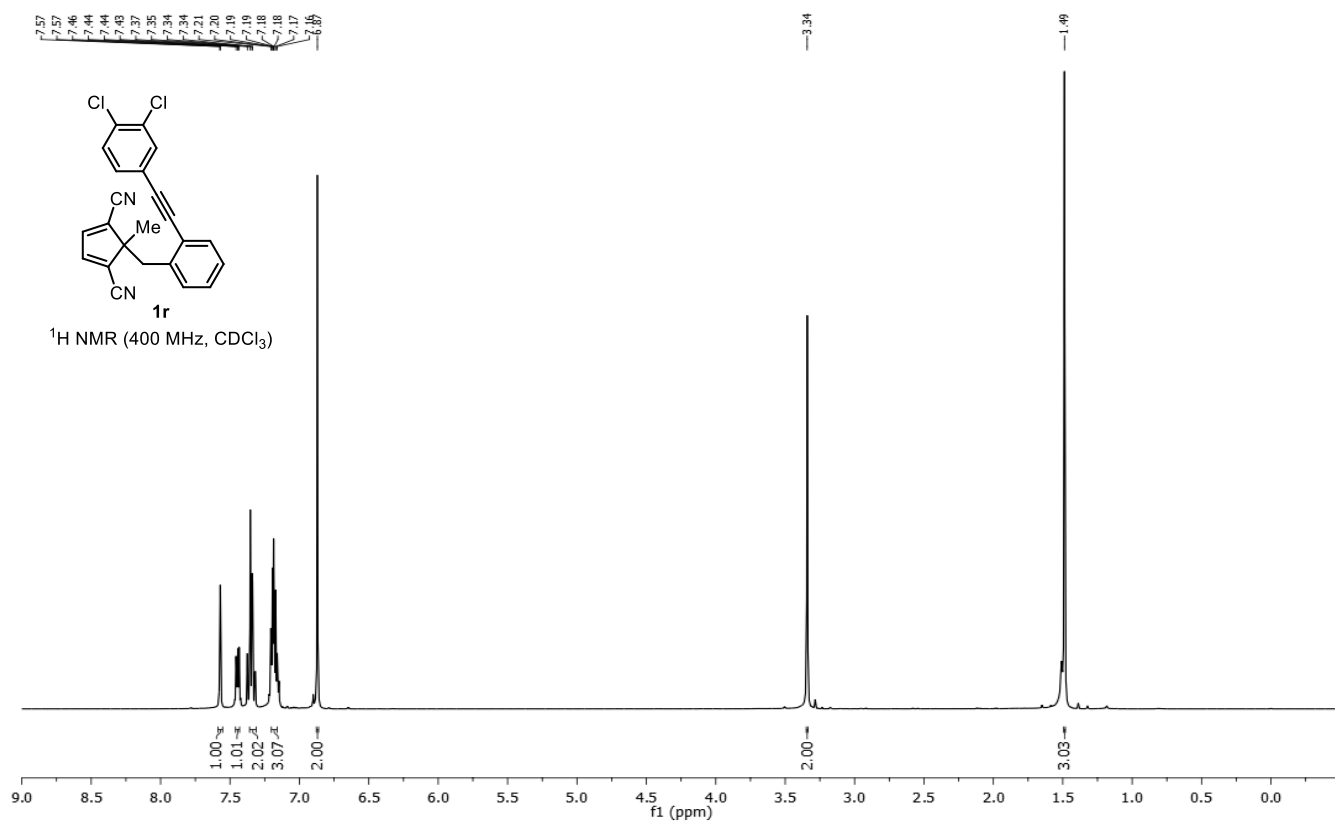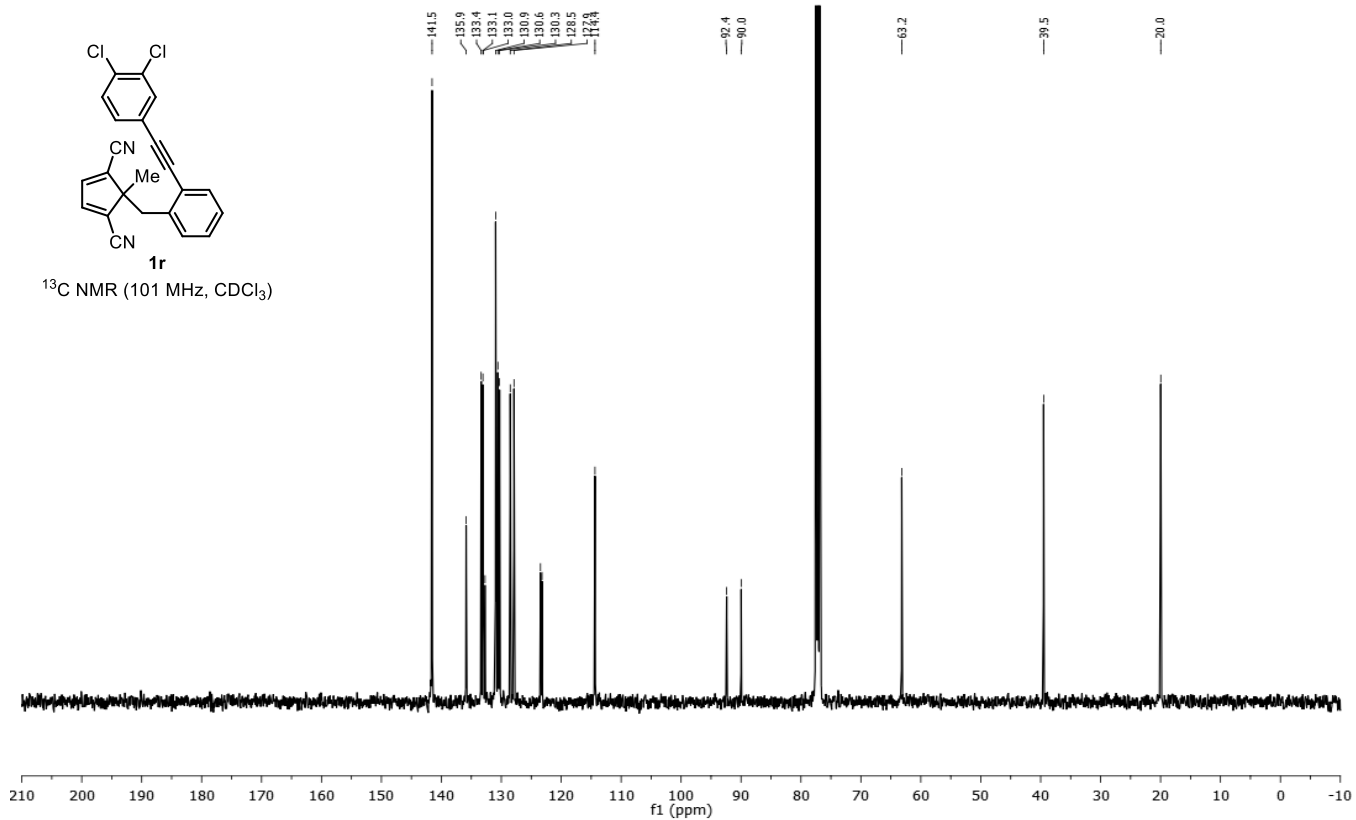

**2-((4-Bromo-3-chlorophenyl)ethynyl)benzyl)-2-methylcyclopenta-3,5-diene-1,3-dicarbonitrile (1s):**

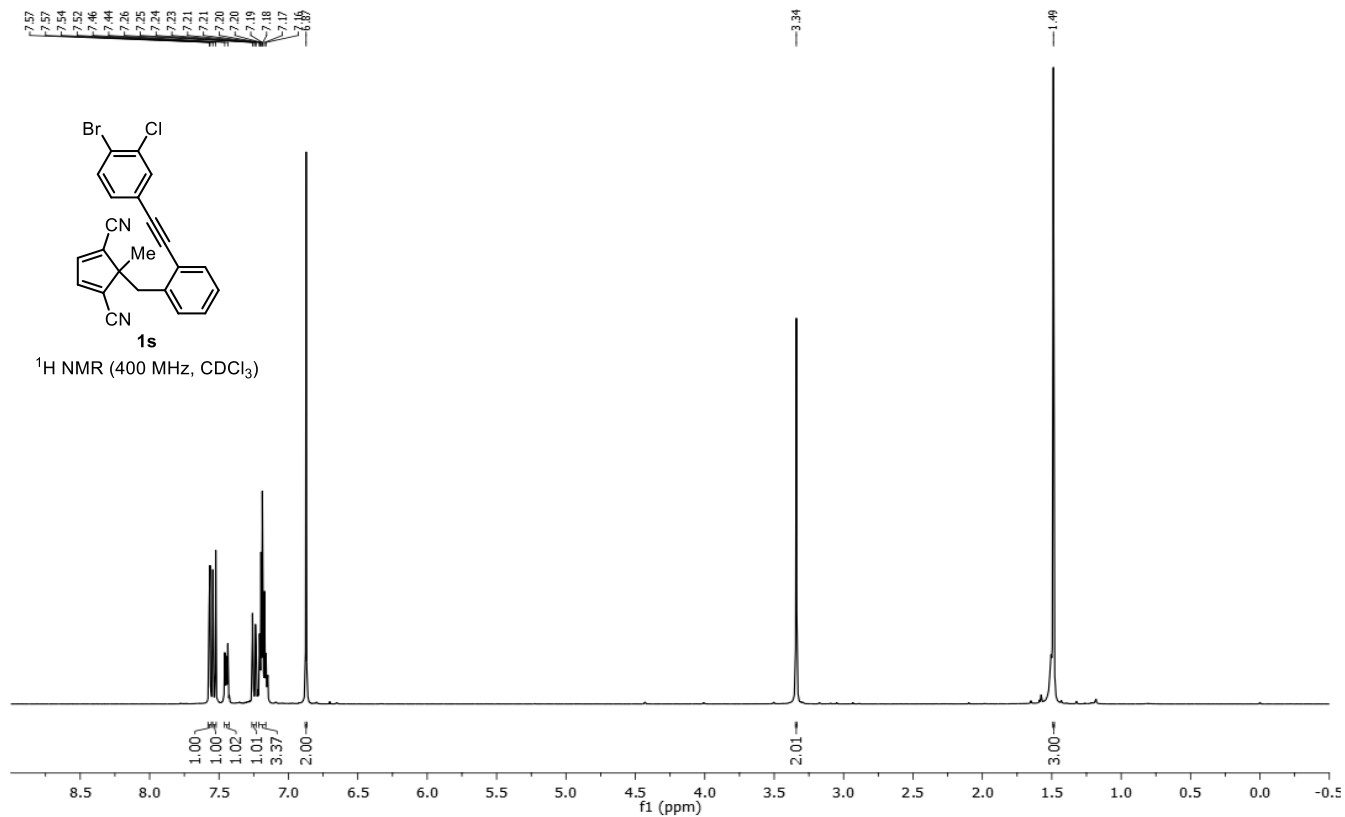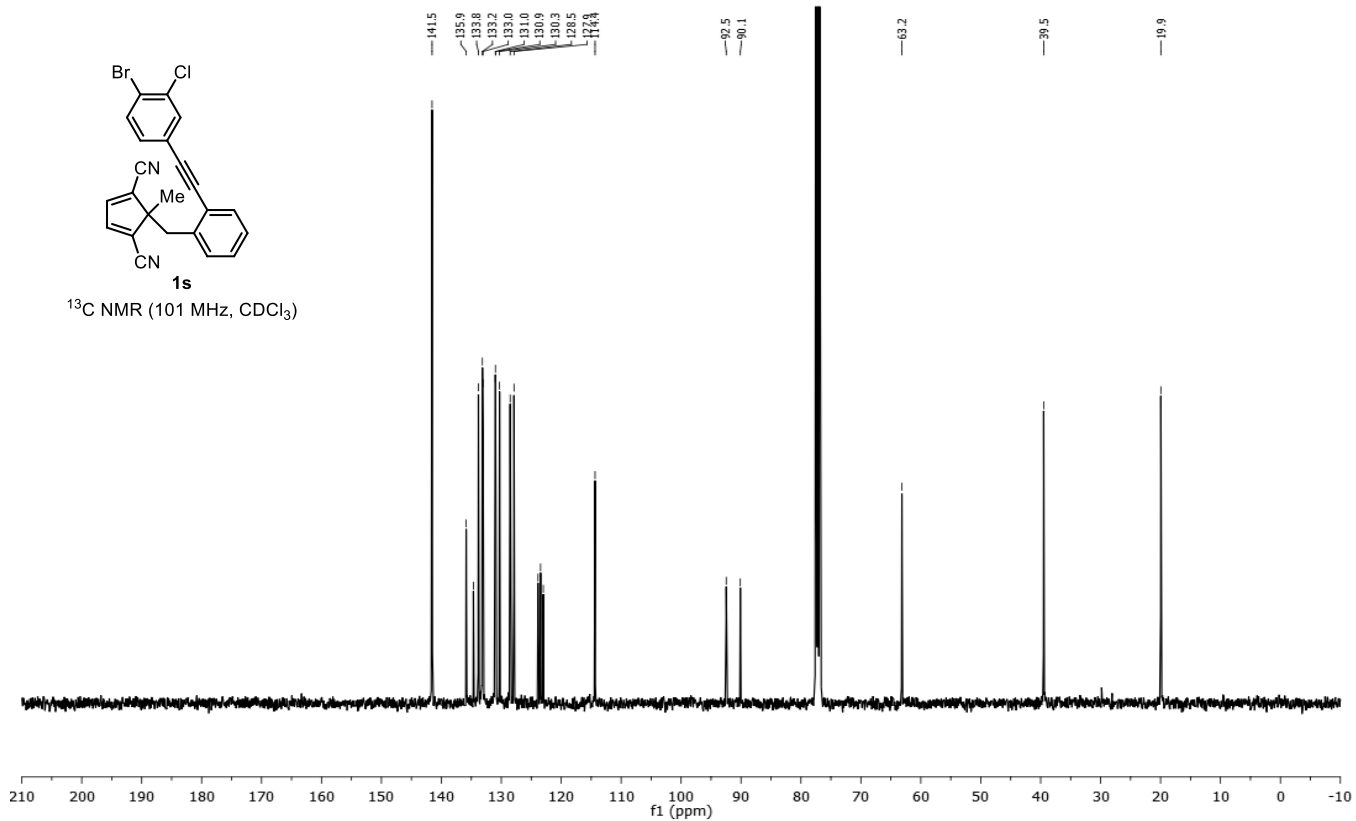

## 2-Methyl-2-(5-methyl-2-(phenylethynyl)benzyl)cyclopenta-3,5-diene-1,3-dicarbonitrile (**1t**):

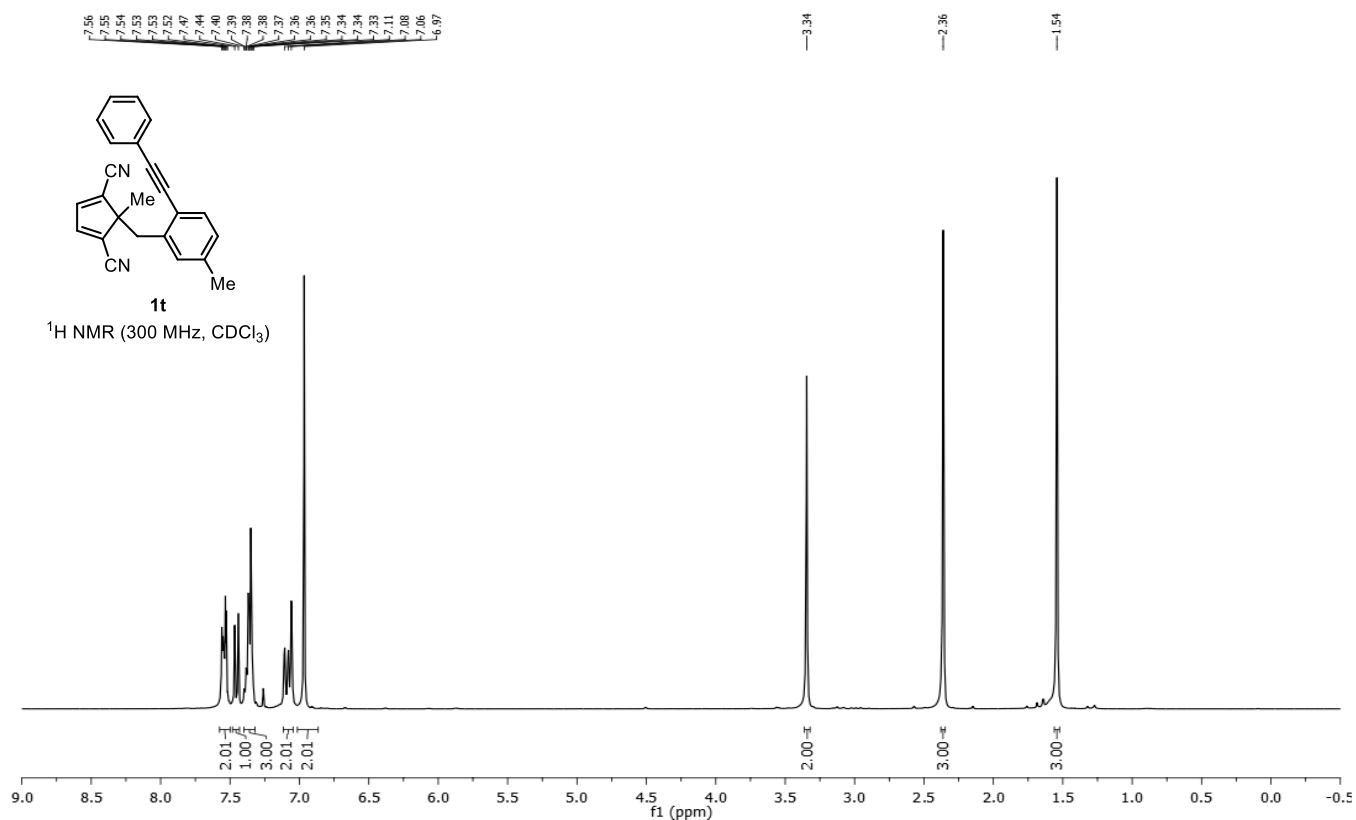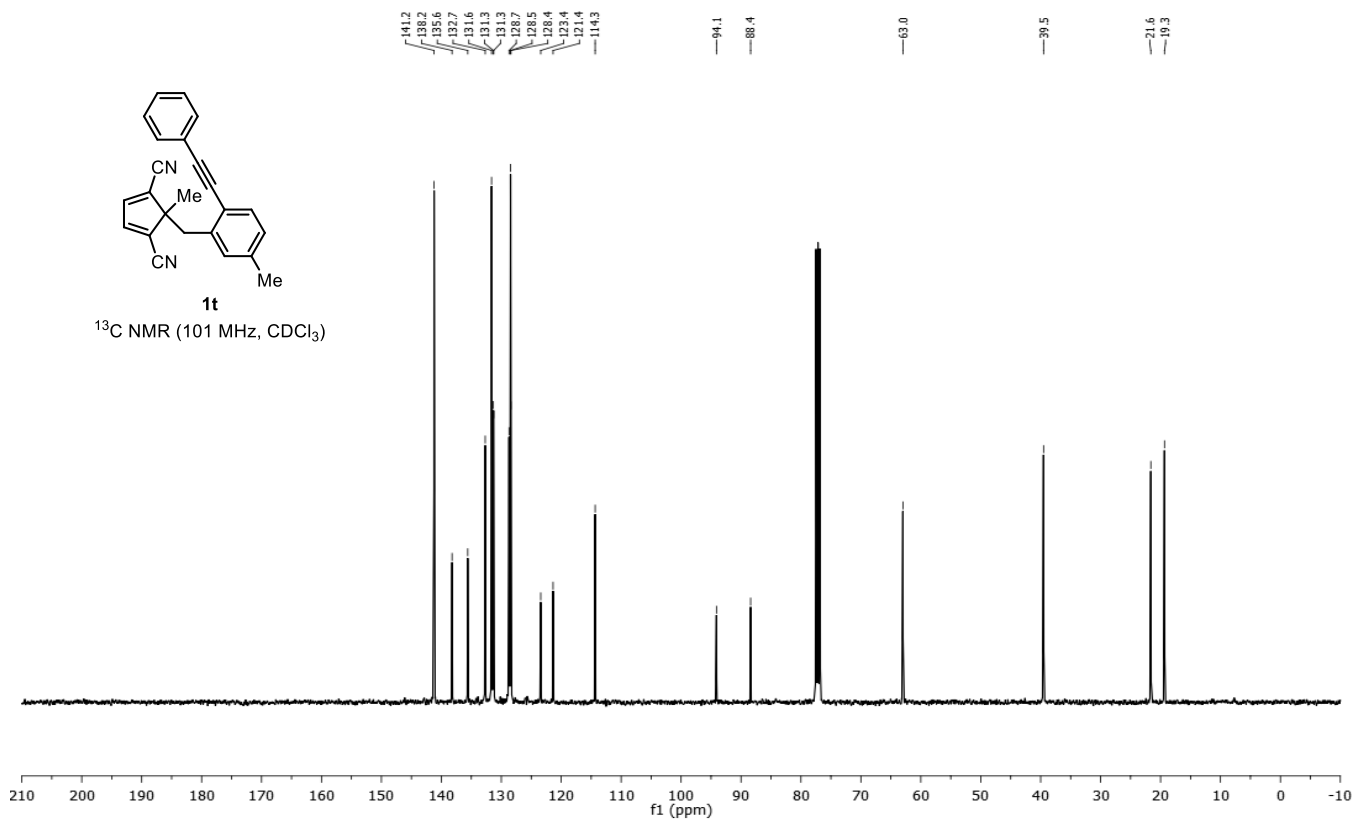

## 2-Methyl-2-(2-(p-tolyethynyl)benzyl)cyclopenta-3,5-diene-1,3-dicarbonitrile (**1u**):

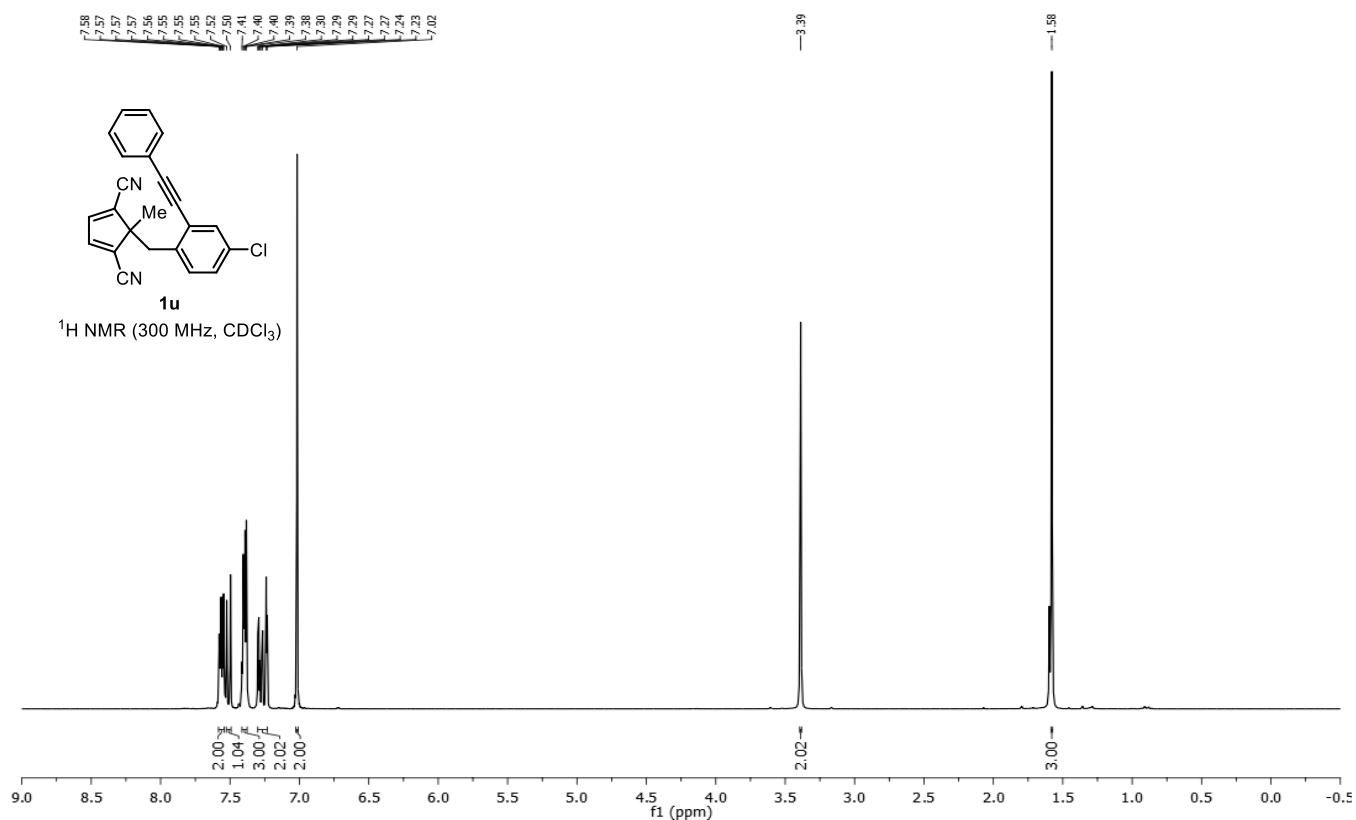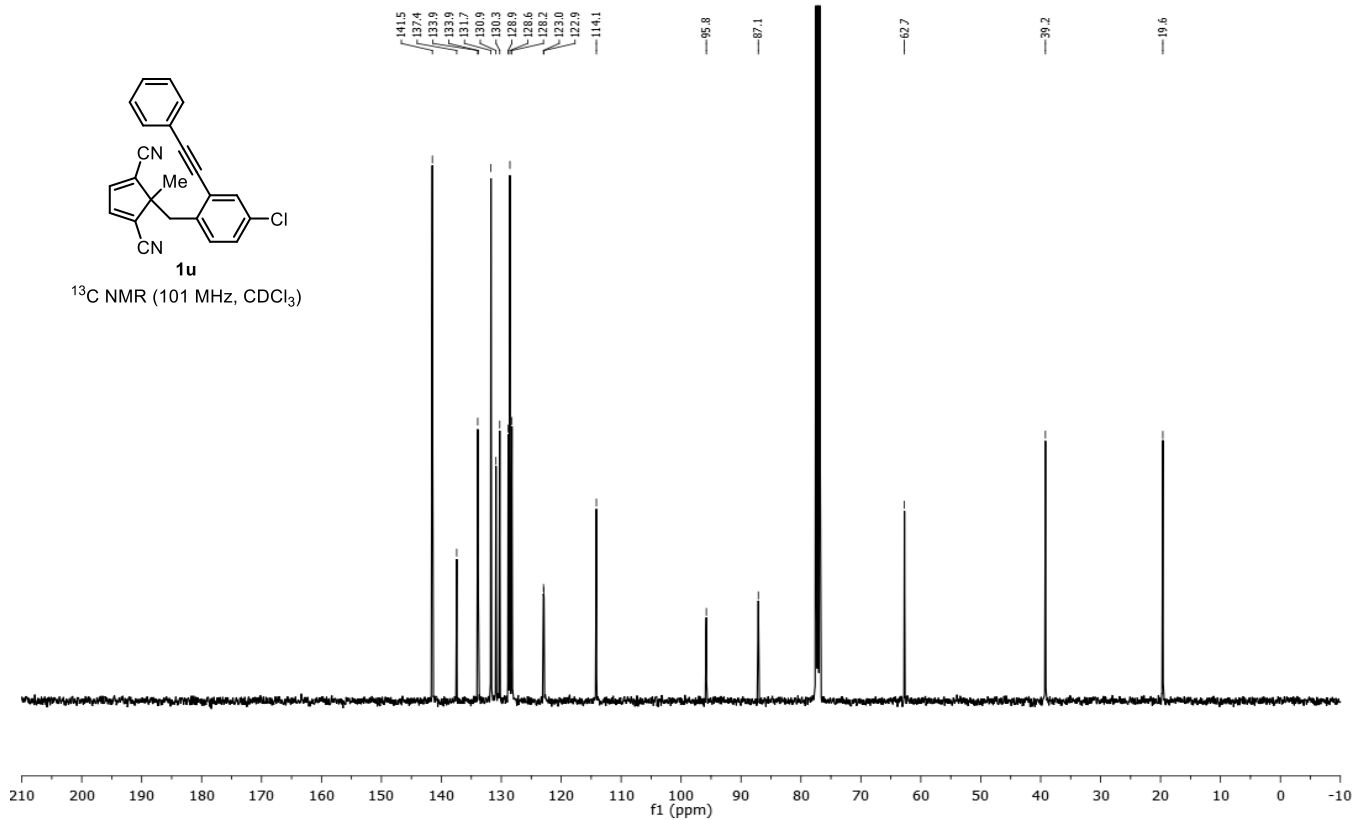

## 2-(2-Bromobenzyl)-2-methylcyclopenta-3,5-diene-1,3-dicarbonitrile (**1v**):

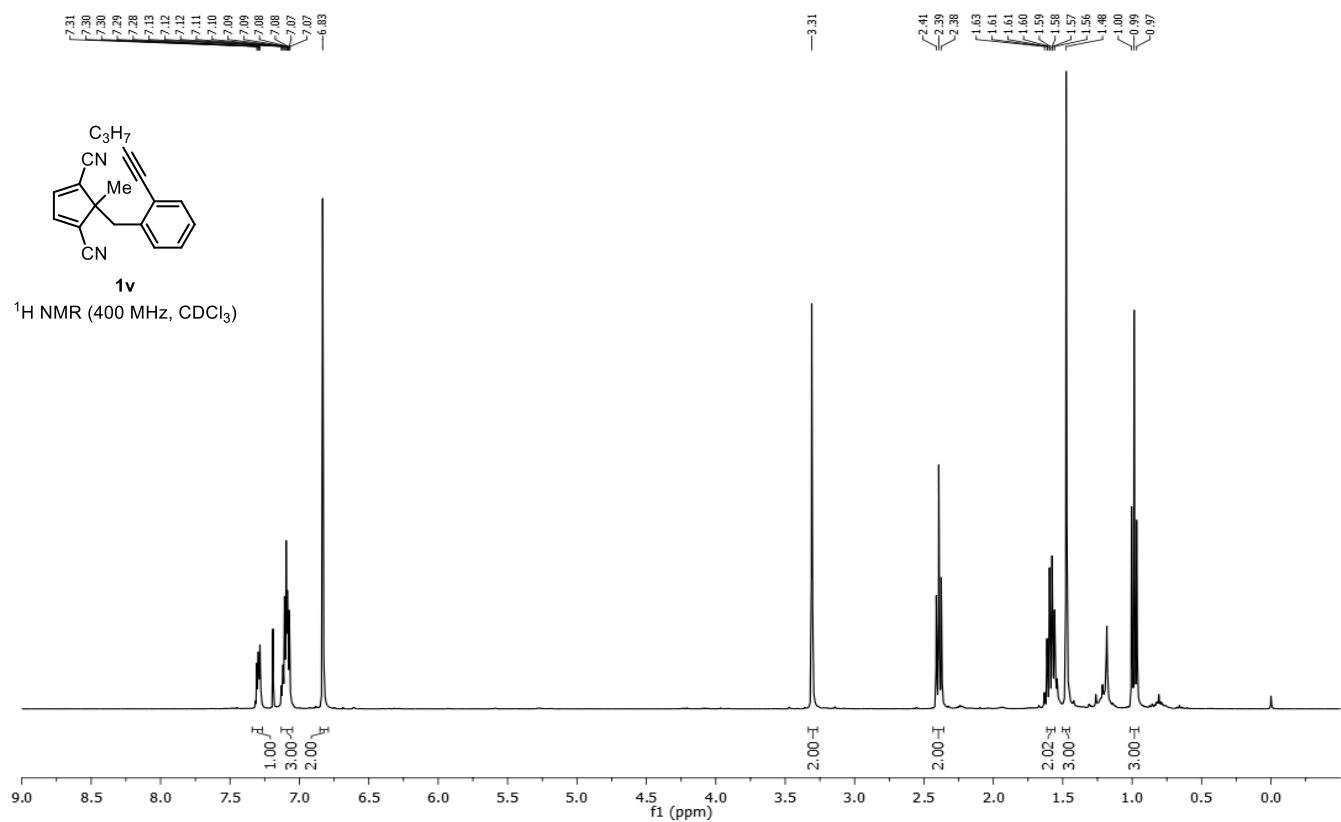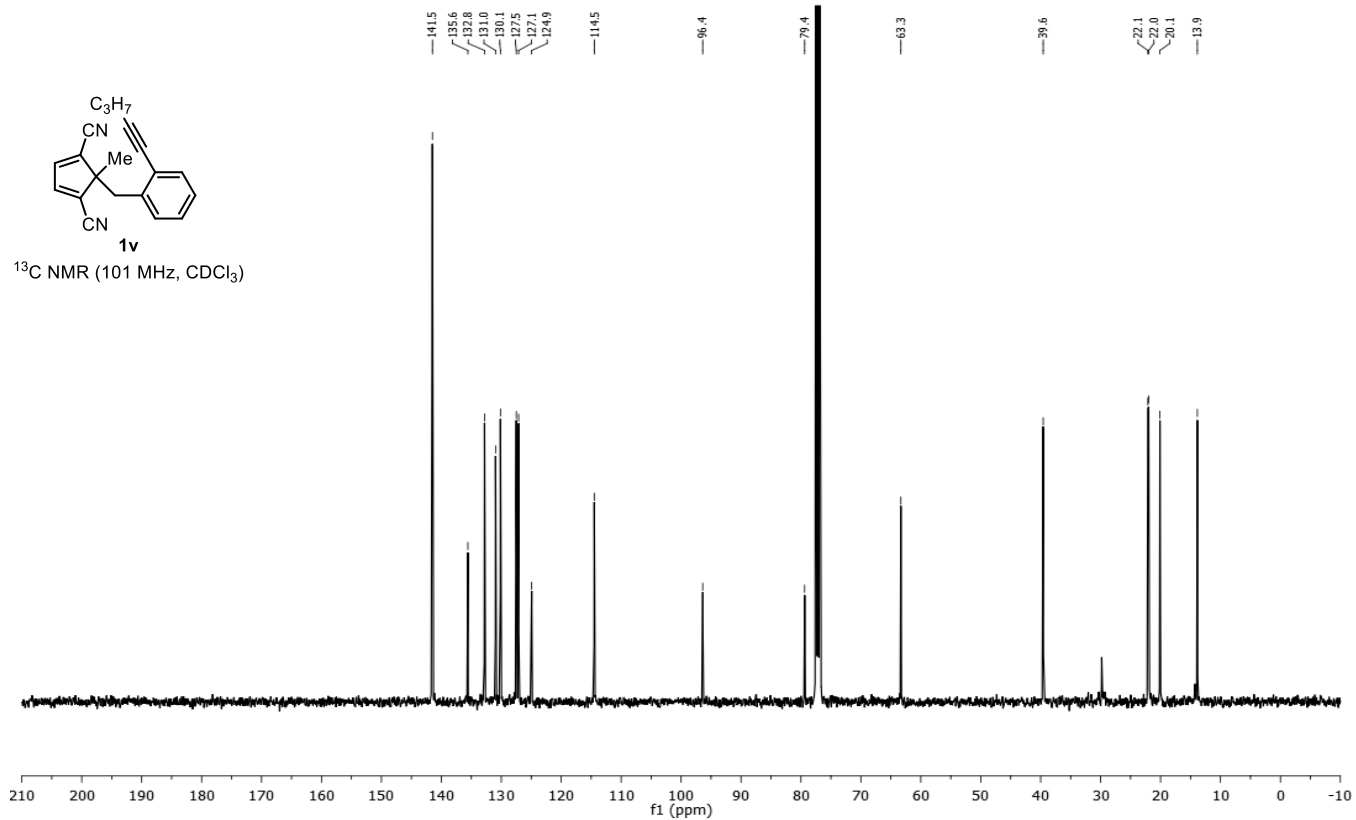

## 2-(2-Bromobenzyl)-2-methylcyclopenta-3,5-diene-1,3-dicarbonitrile (S7):

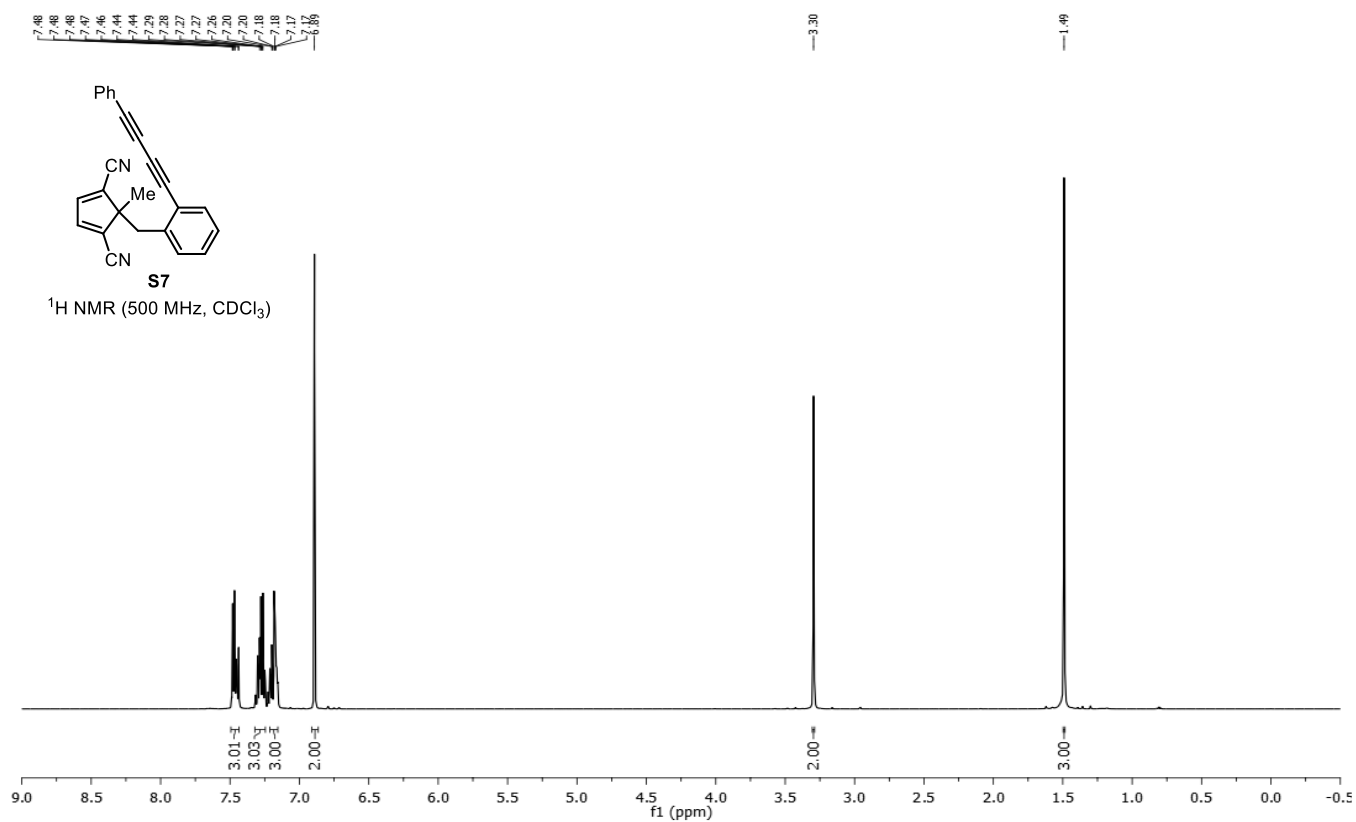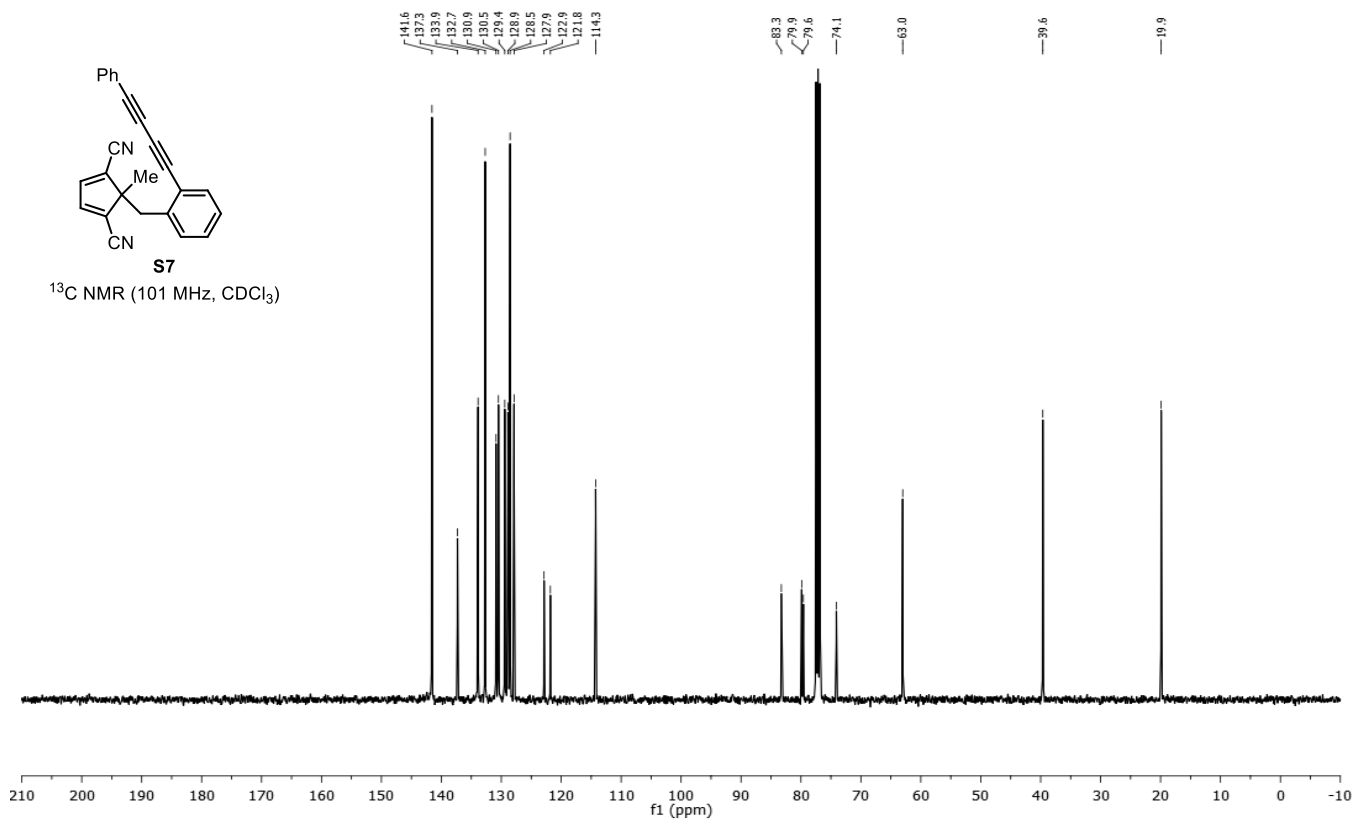



# Ethyl 1-(2-Bromobenzyl)-2-cyano-2-hydroxycyclopentane-1-carboxylate (S11):

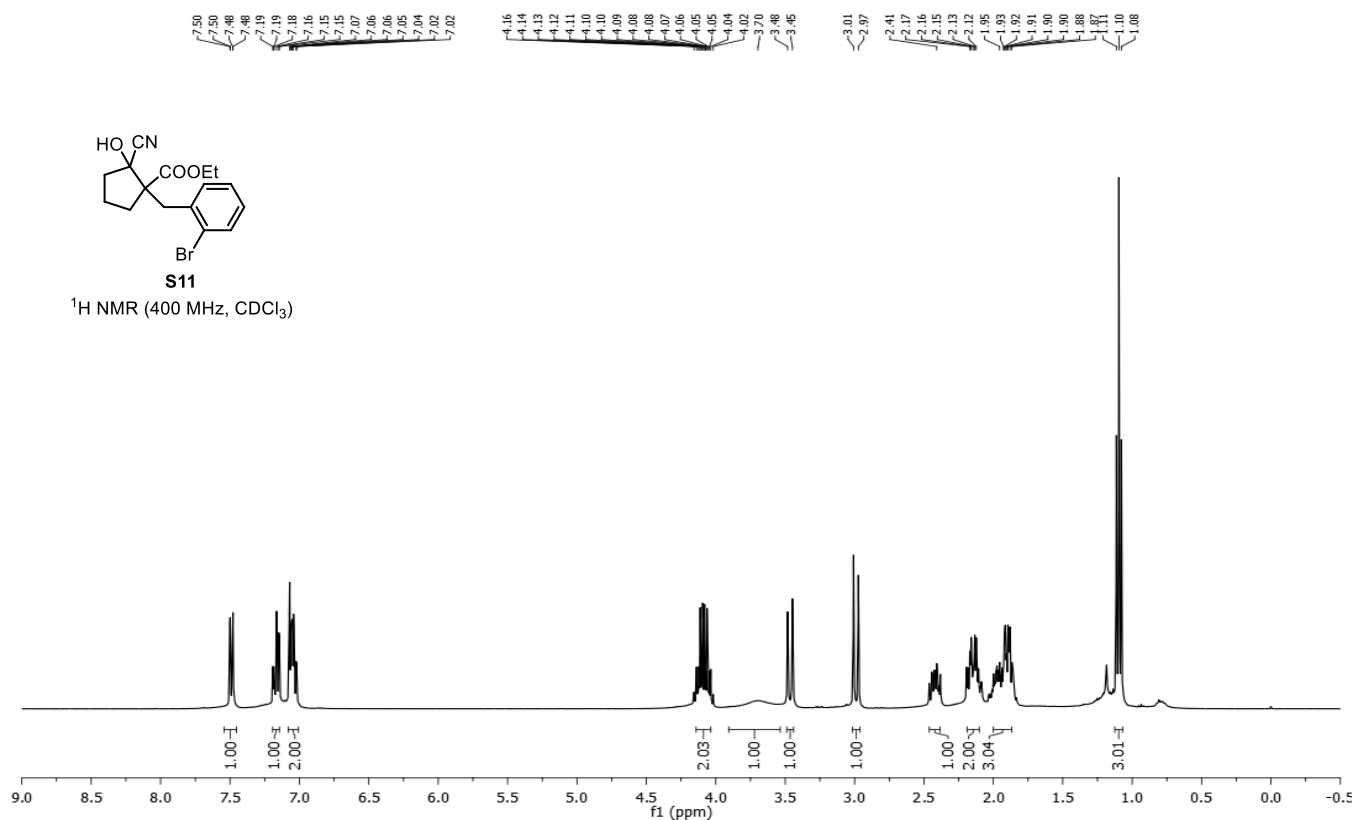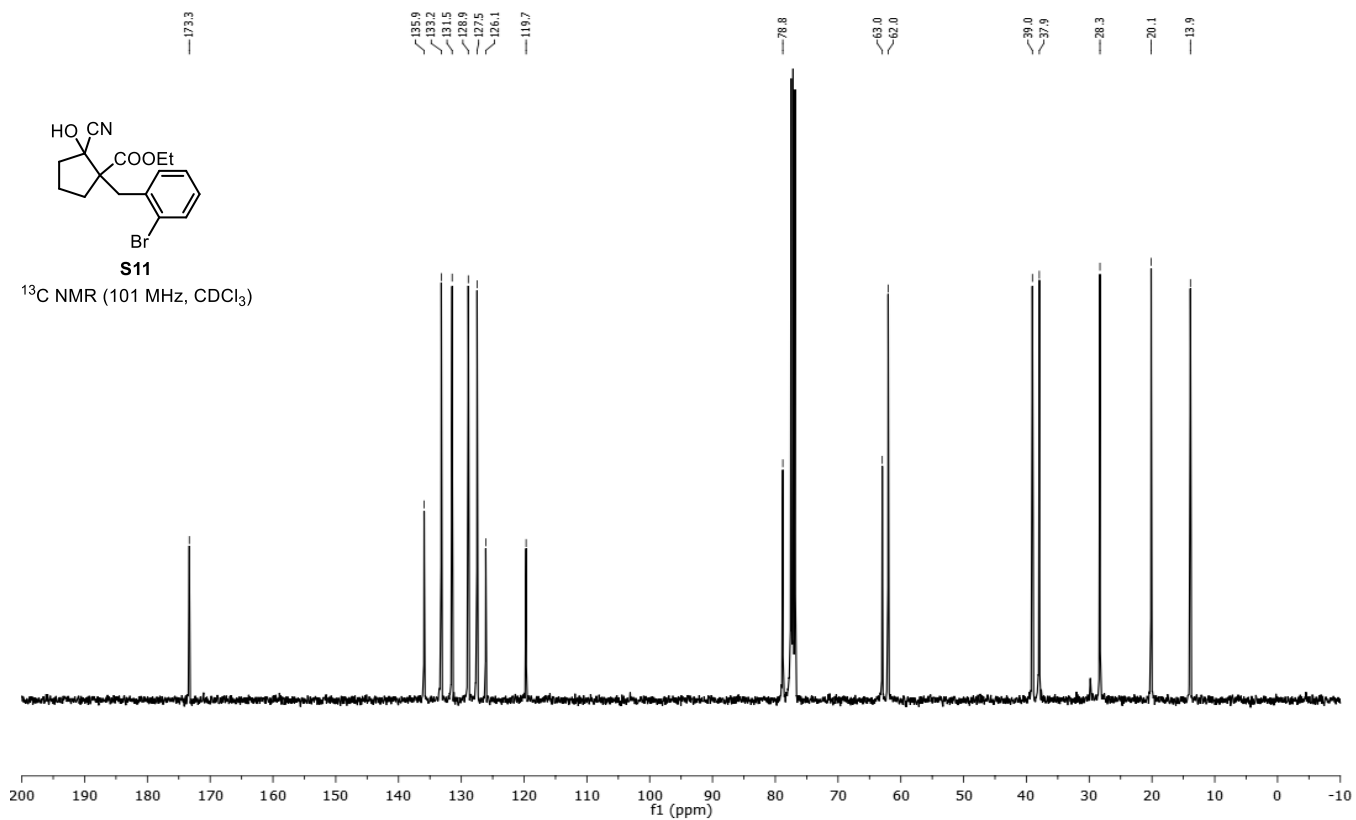



# Ethyl 1-(2-Bromobenzyl)-2-cyanocyclopent-2-ene-1-carboxylate (S12):

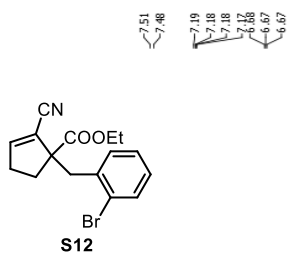

<sup>1</sup>H NMR (300 MHz, CDCl<sub>3</sub>)

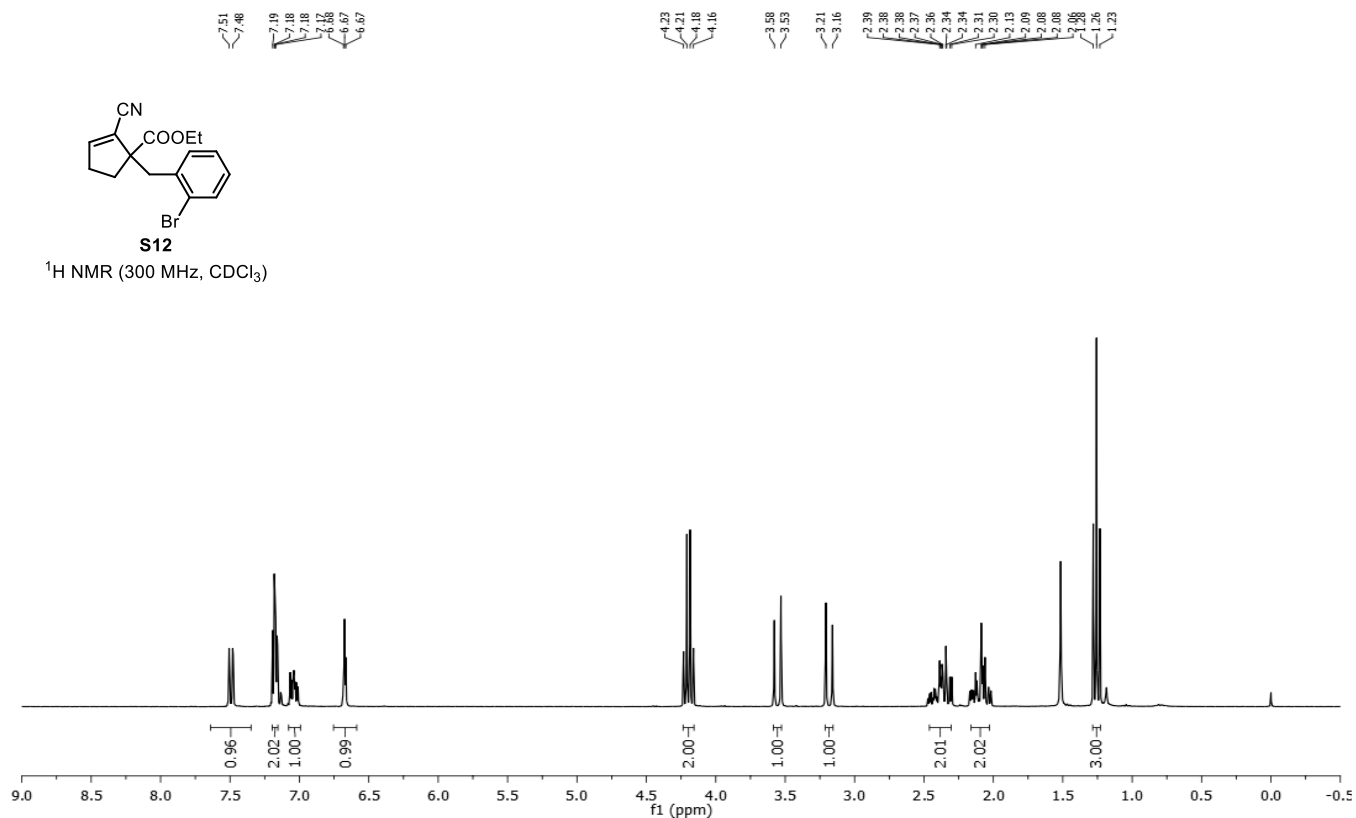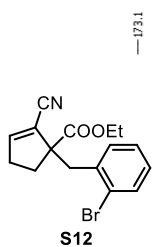

<sup>13</sup>C NMR (126 MHz, CDCl<sub>3</sub>)

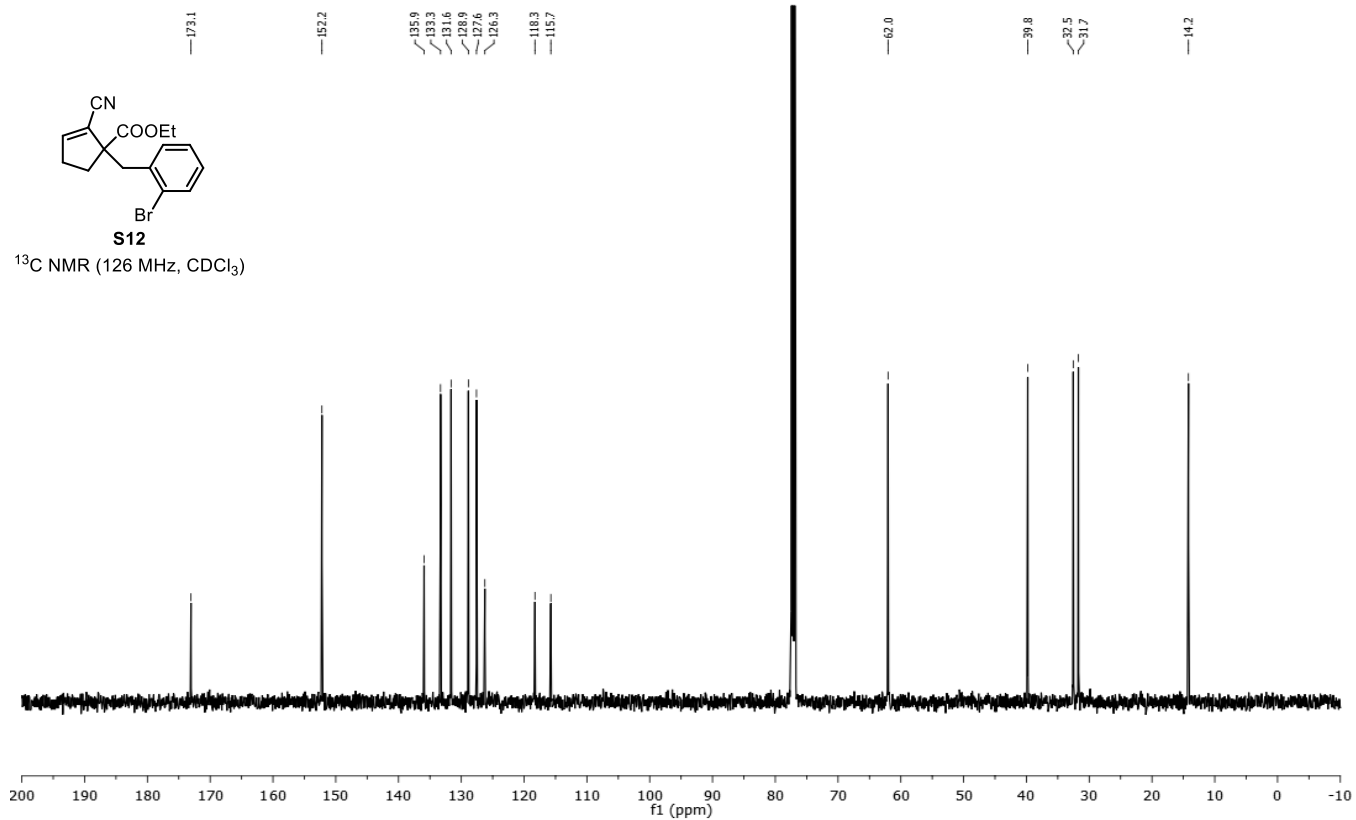

**Ethyl 2-cyano-1-(2-(phenylethynyl)benzyl)cyclopent-2-ene-1-carboxylate (S13):**

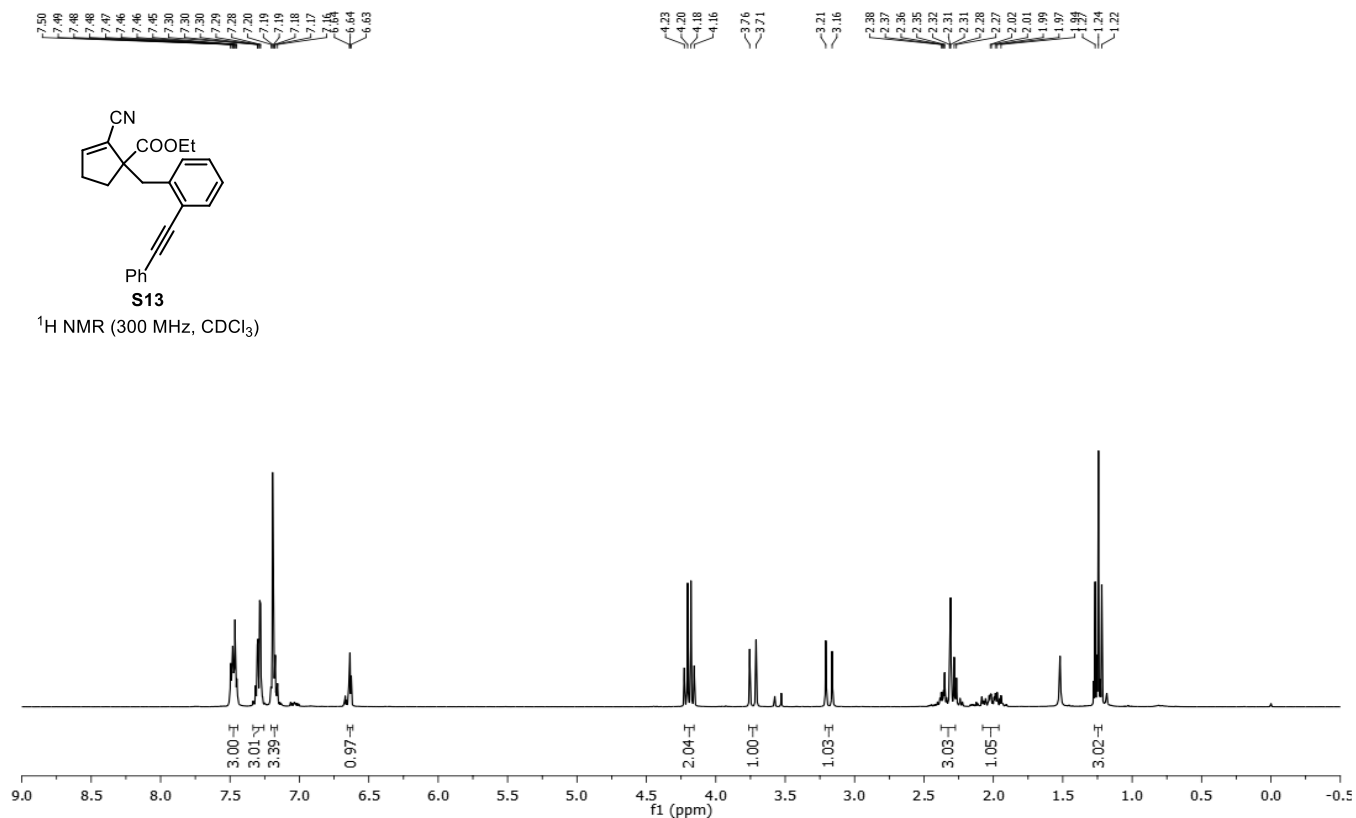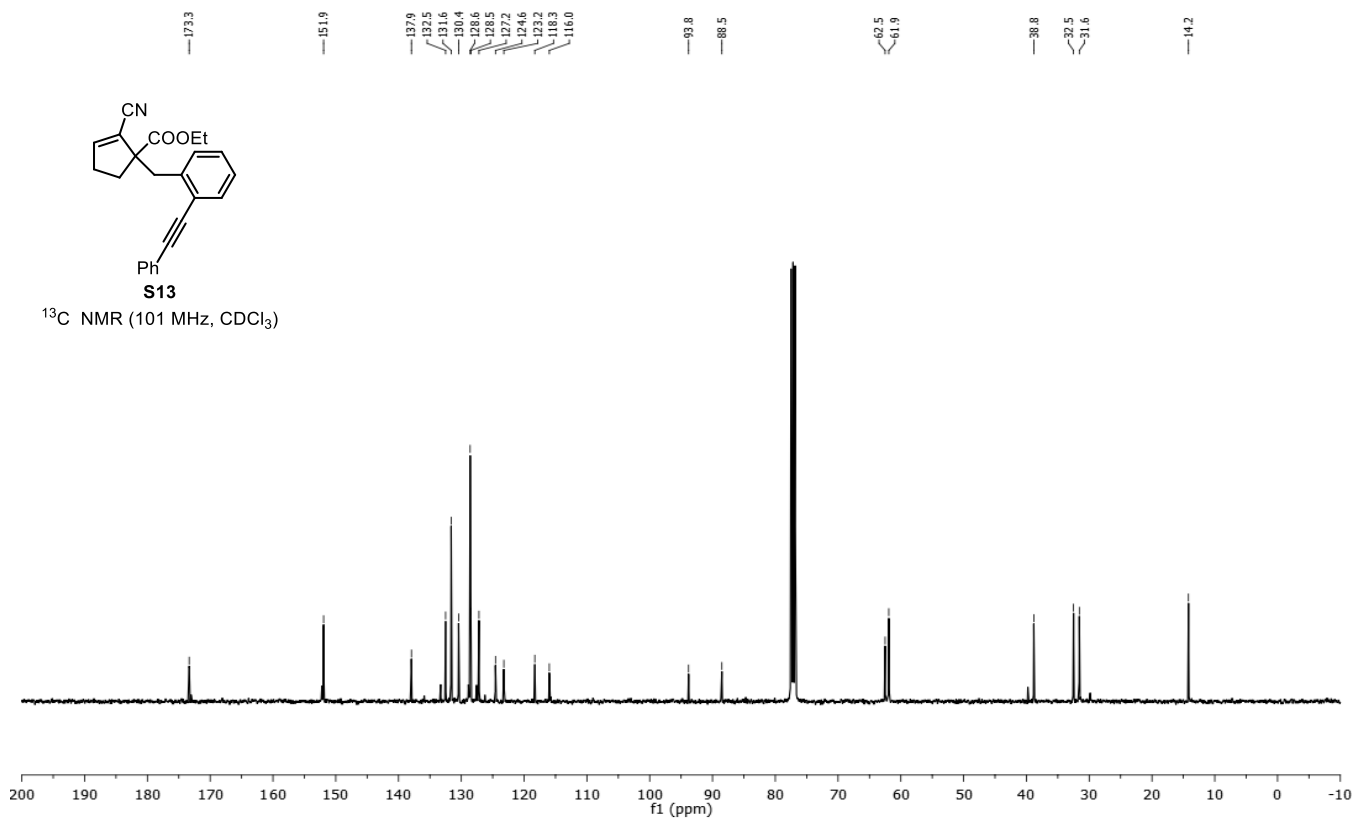

**7b-Benzoyl-2a1-isocyano-2a-methyl-2a,2a1,7b,7c-tetrahydro-3H benzo[f]cyclopropa[cd]indene-2-carbonitrile (2a):**

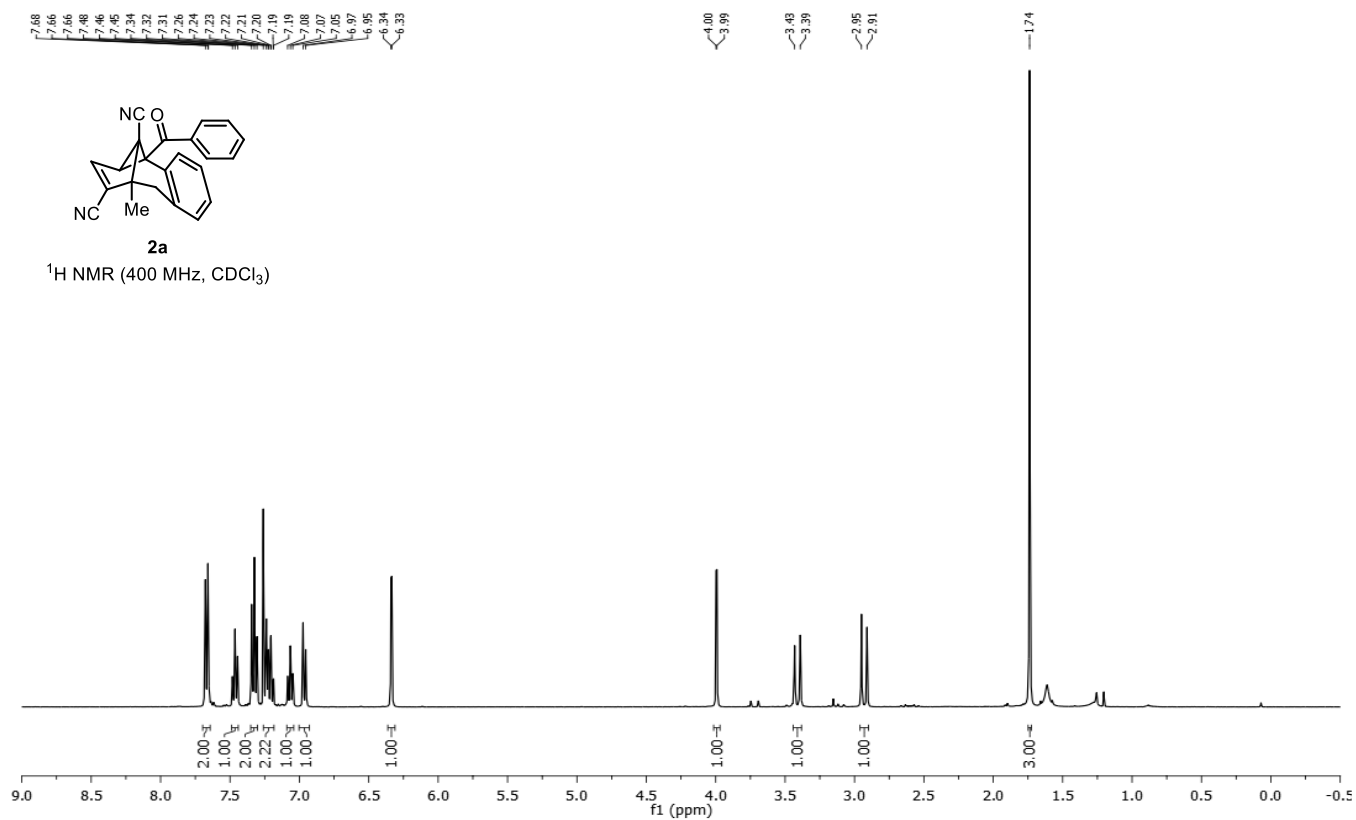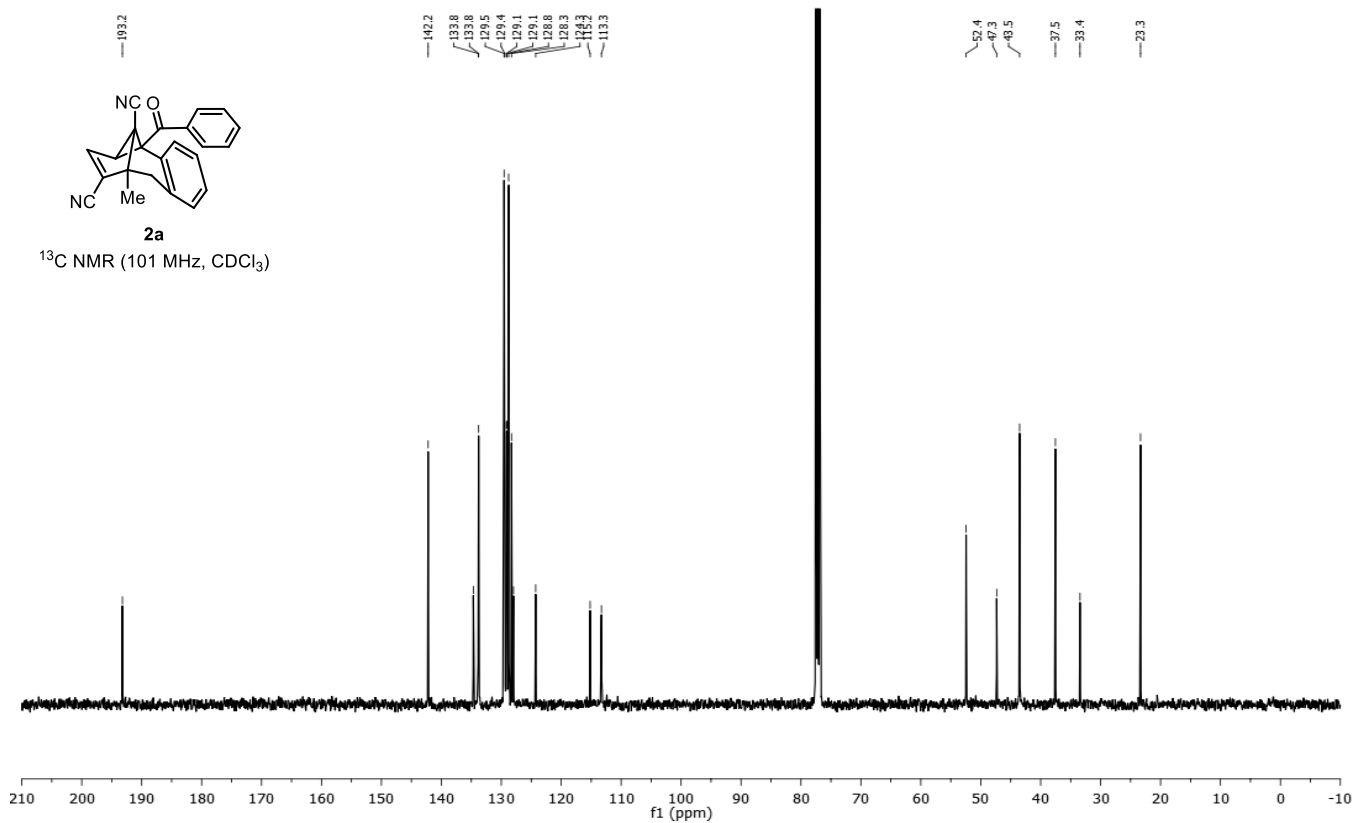

**2-Methyl-2-(2-(2-oxo-2-phenylacetyl)benzyl)cyclopenta-3,5-diene-1,3-dicarbonitrile (3a):**

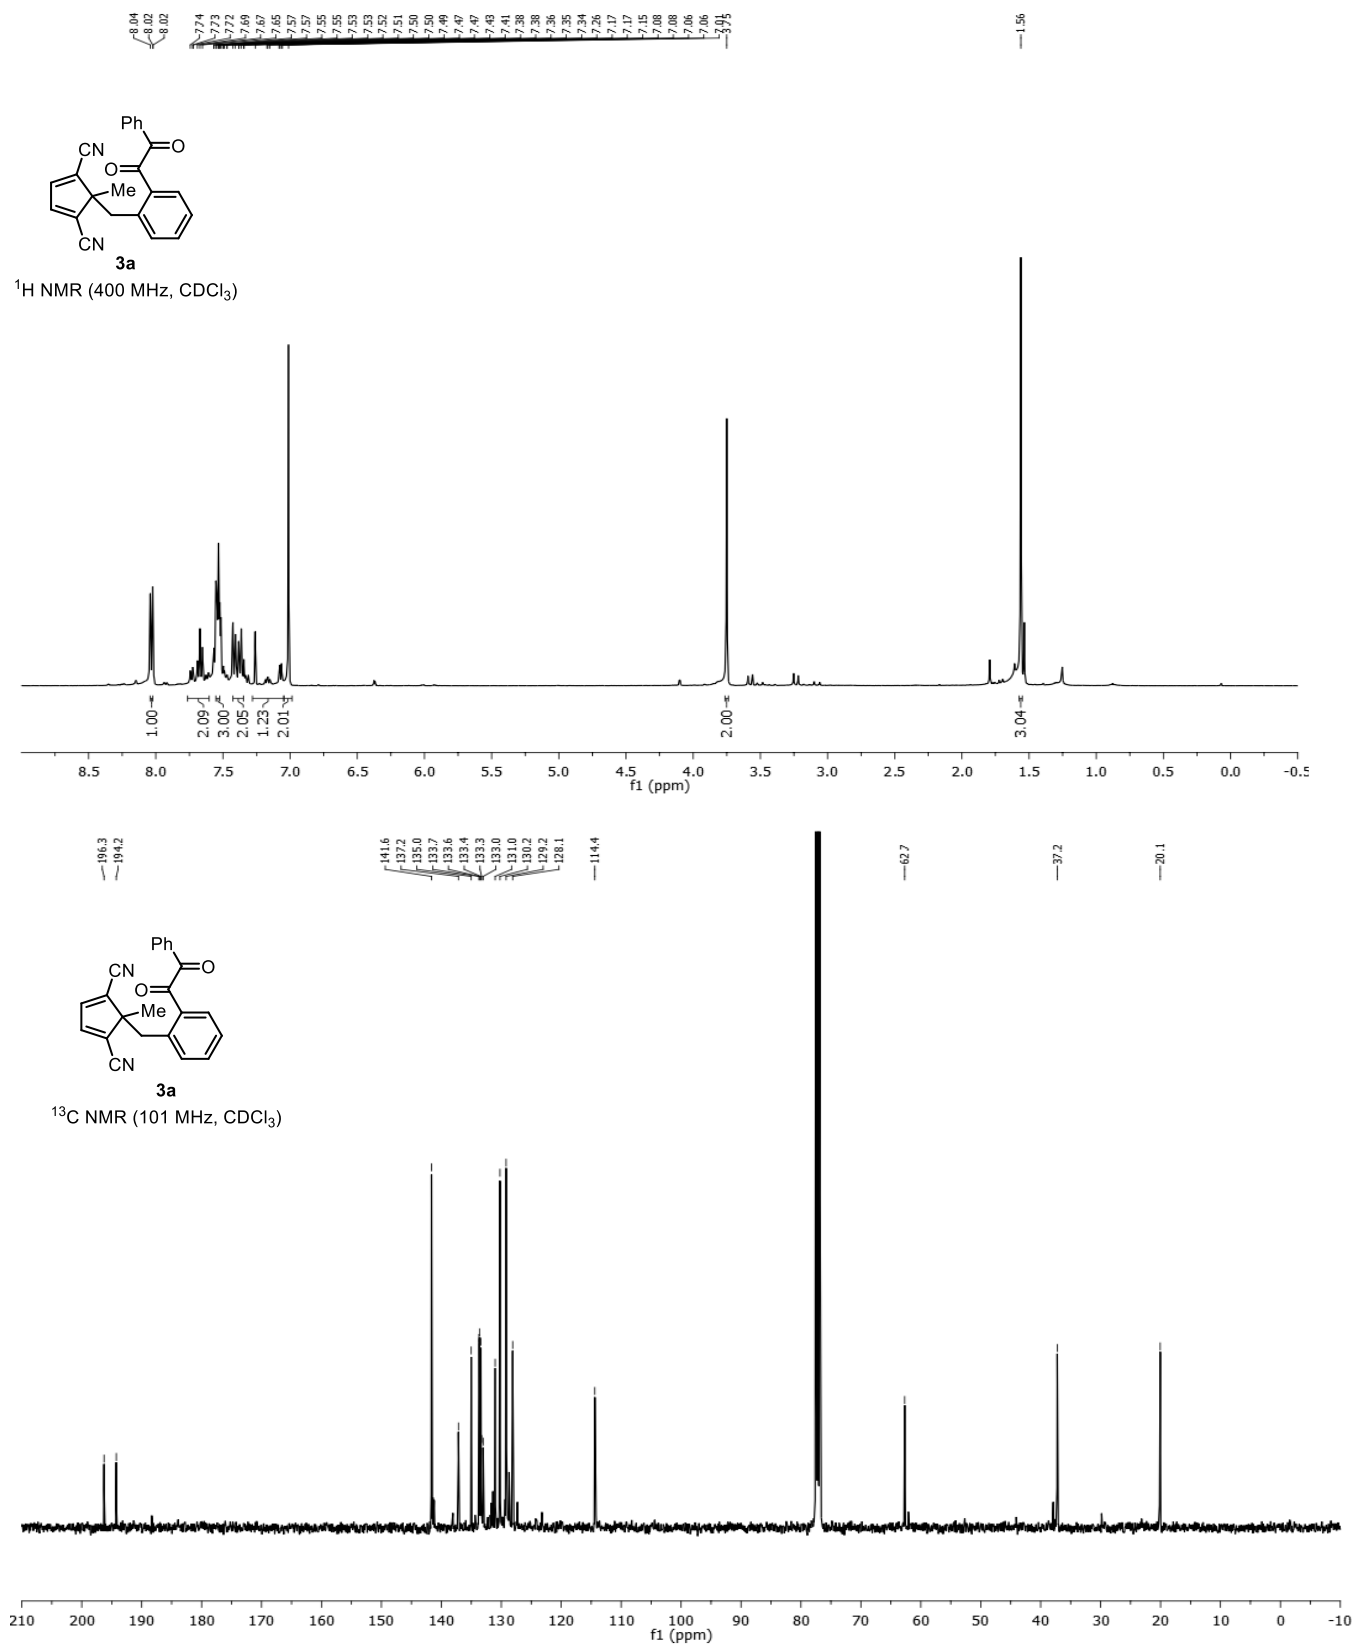

**2a<sup>1</sup>-Isocyano-2a-methyl-7b-(4-methylbenzoyl)-2a,2a<sup>1</sup>,7b,7c-tetrahydro-3H-benzo[*f*]cyclopropa[*cd*]indene-2-carbonitrile(2b):**

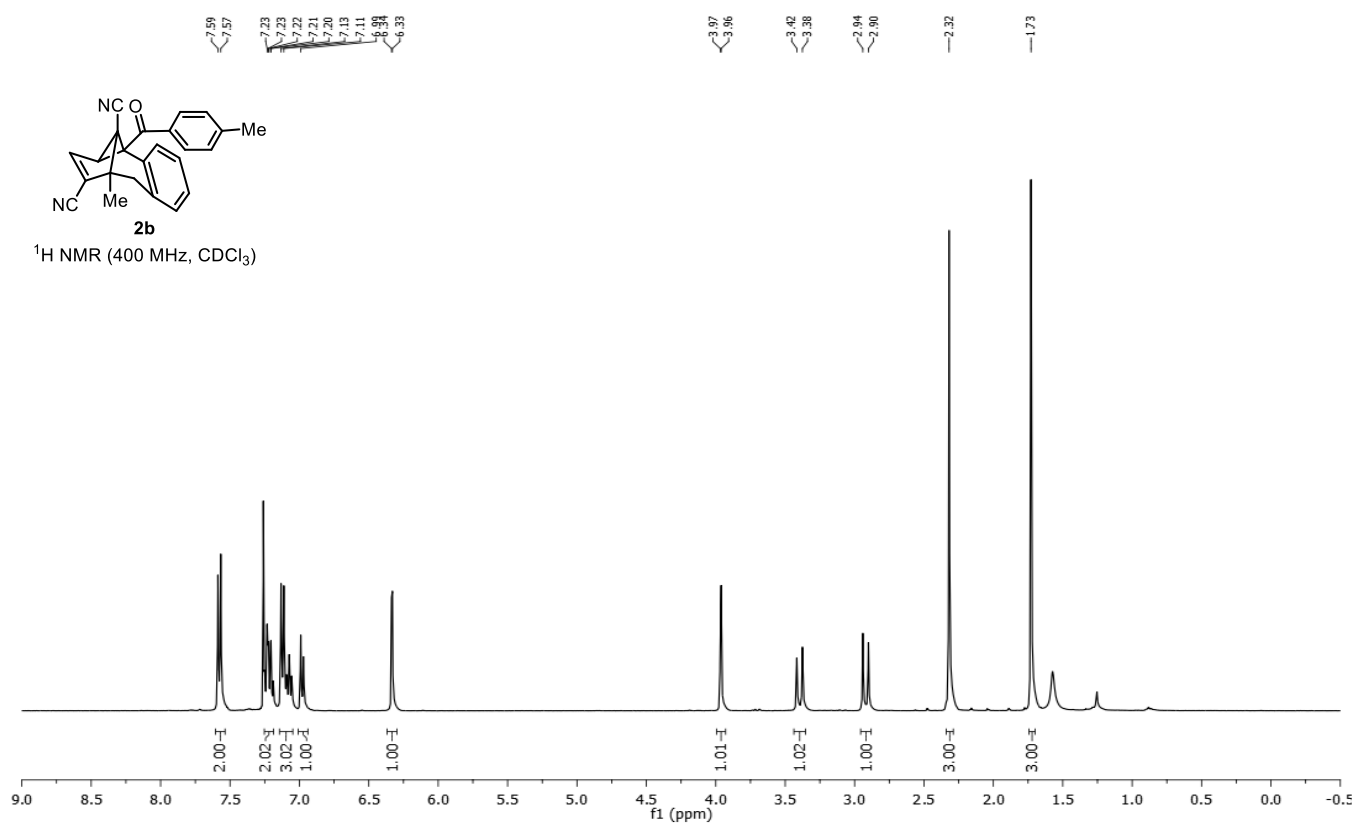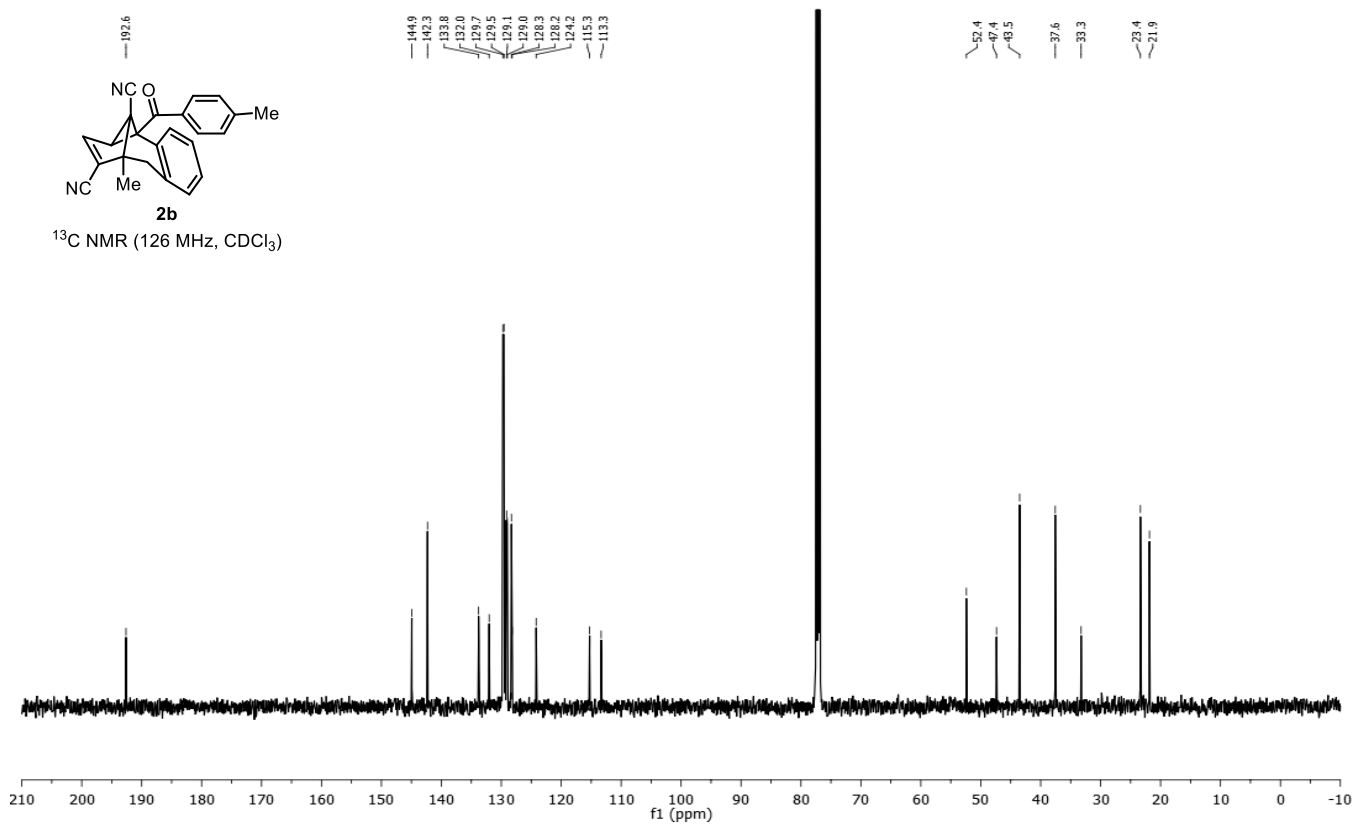

**4-(Tert-butyl)benzoyl)-2a<sup>1</sup>-isocyano-2a-methyl-2a,2a<sup>1</sup>,7b,7c-tetrahydro-3H-benzo[*f*]cyclopropa[*cd*]indene-2-carbonitrile (2c):**

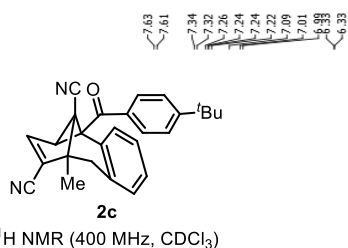

<sup>1</sup>H NMR (400 MHz, CDCl<sub>3</sub>)

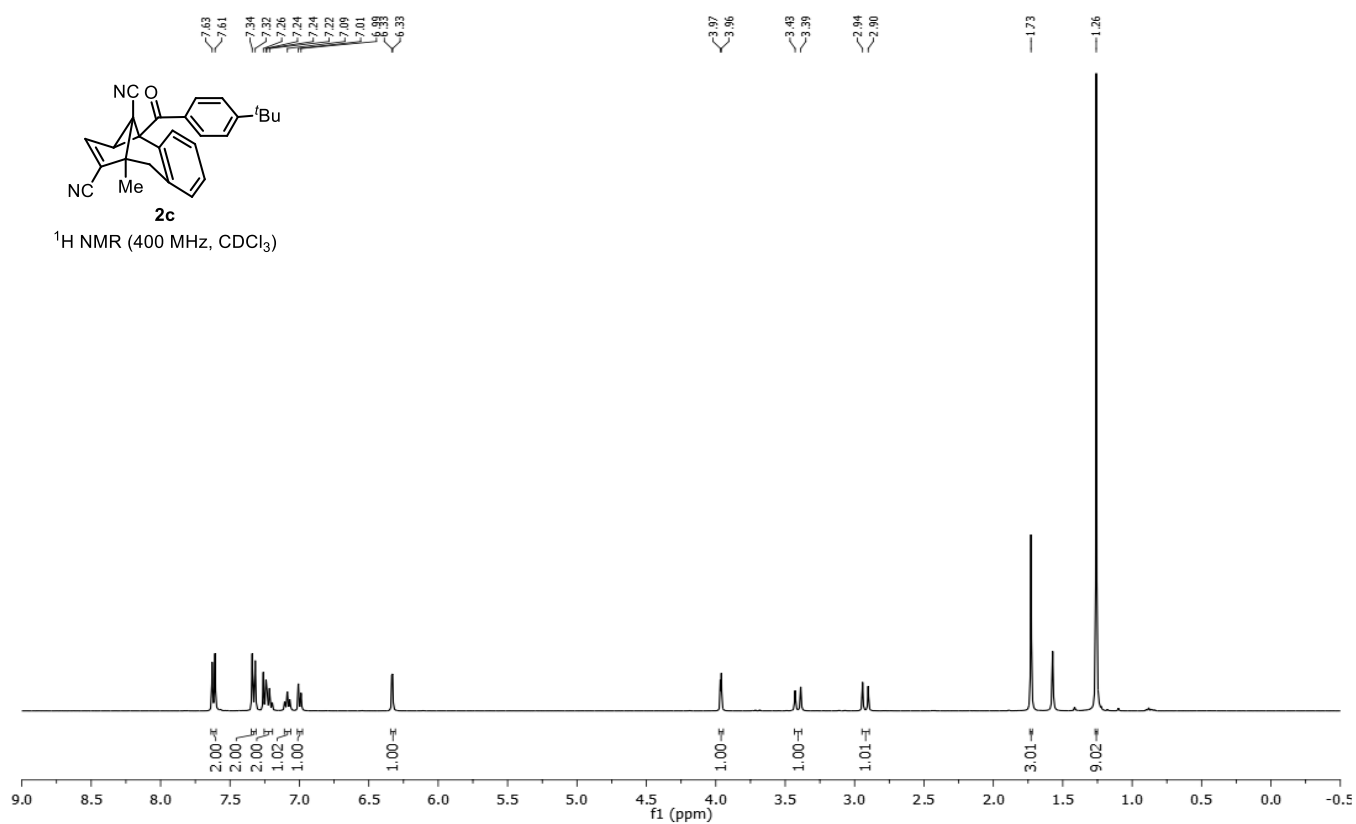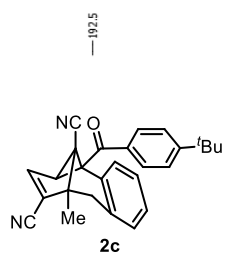

<sup>13</sup>C NMR (101 MHz, CDCl<sub>3</sub>)

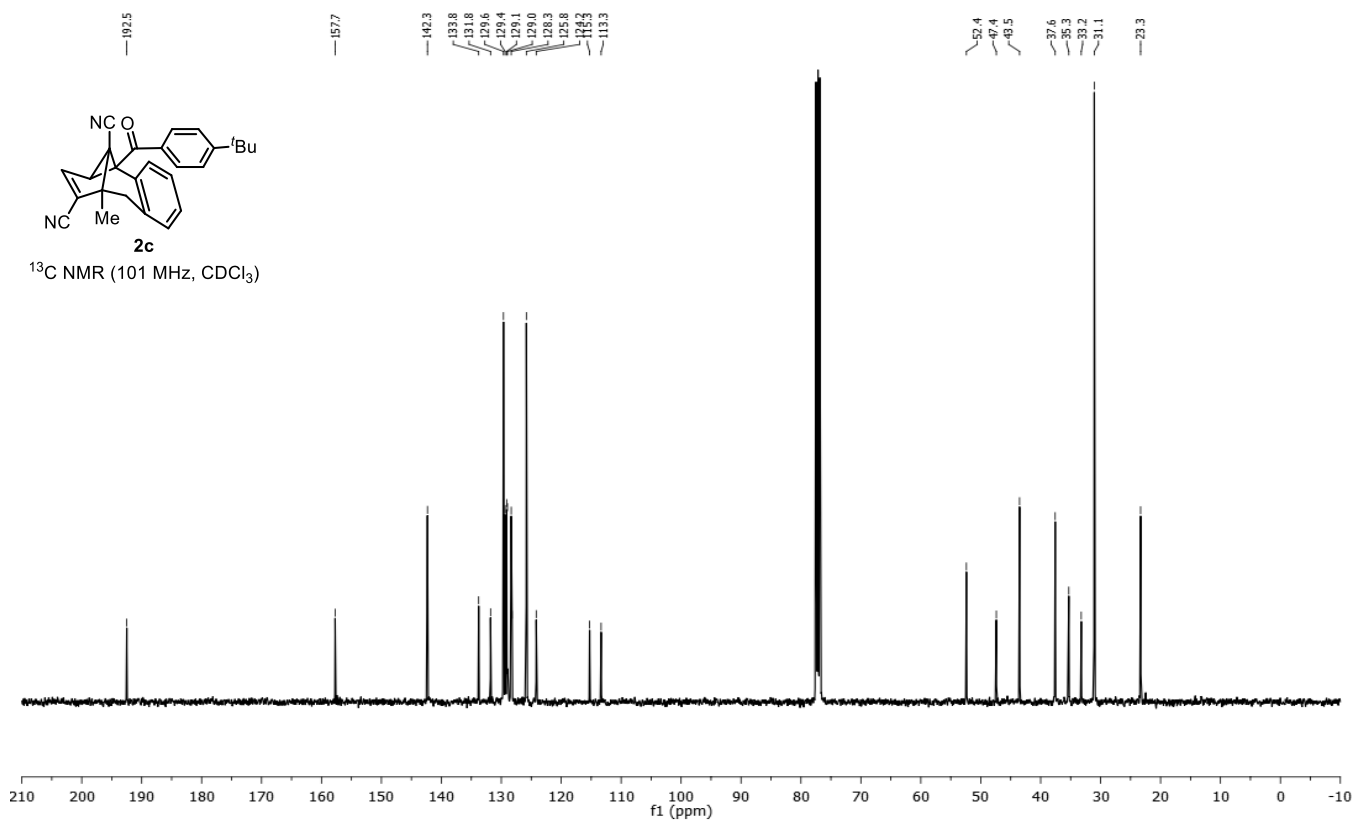

**2a<sup>1</sup>-Isocyano-7b-(4-methoxybenzoyl)-2a-methyl-2a,2a<sup>1</sup>,7b,7c-tetrahydro-3H-benzo[*f*]cyclopropa[*cd*]indene-2-carbonitrile (2d):**

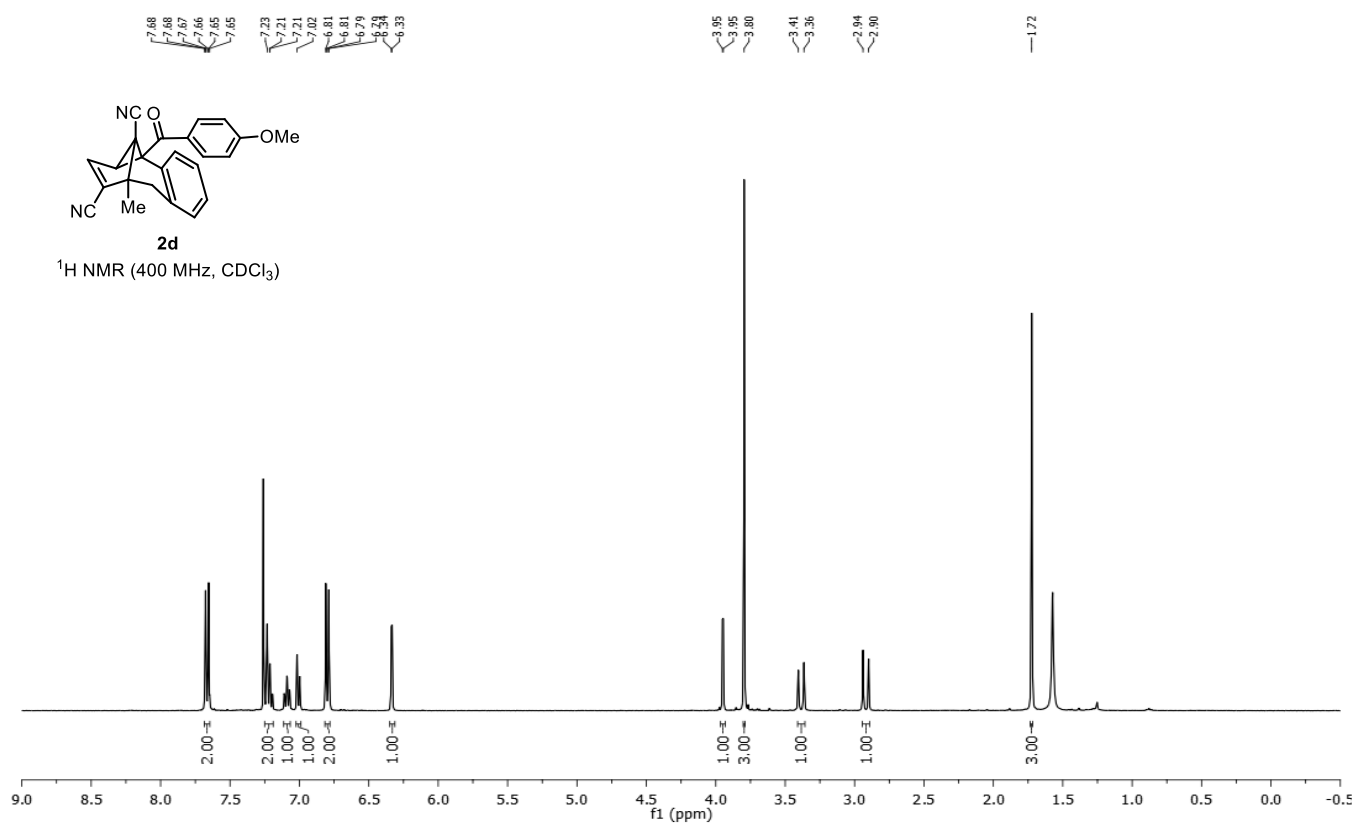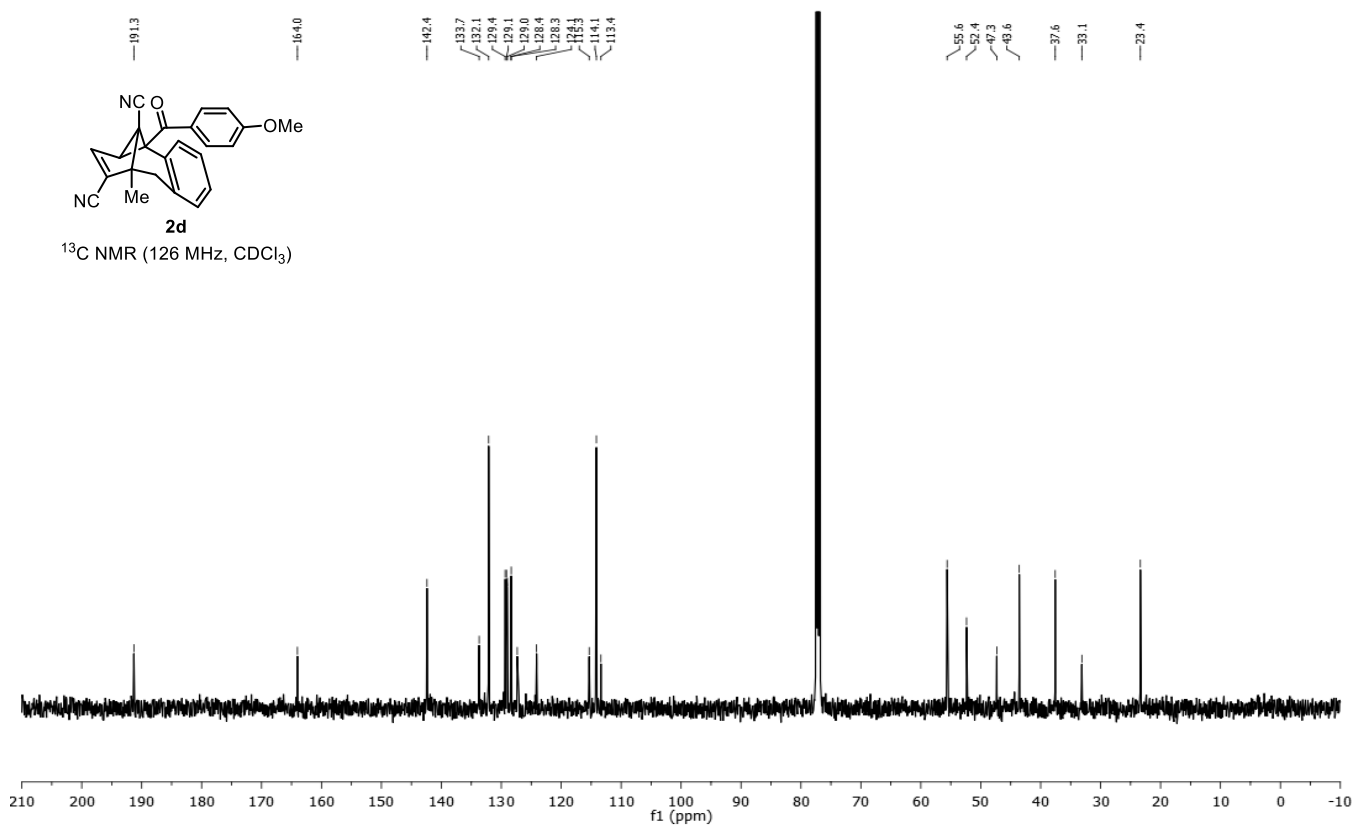

**4-(Benzyloxy)benzoyl-2a<sup>1</sup>-isocyano-2a-methyl-2a,2a<sup>1</sup>,7b,7c-tetrahydro-3H-benzo[f]cyclopropa[cd]indene-2-carbonitrile (2e):**

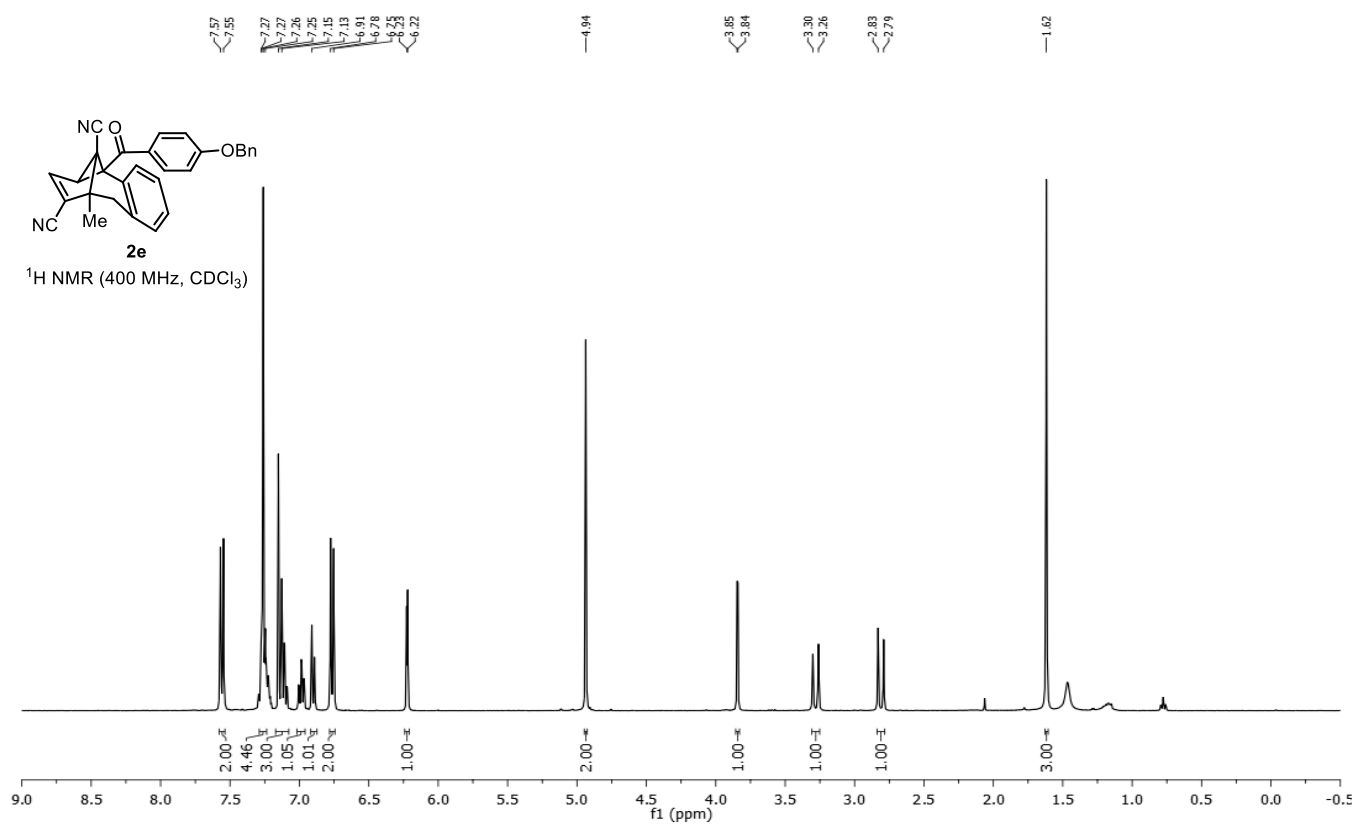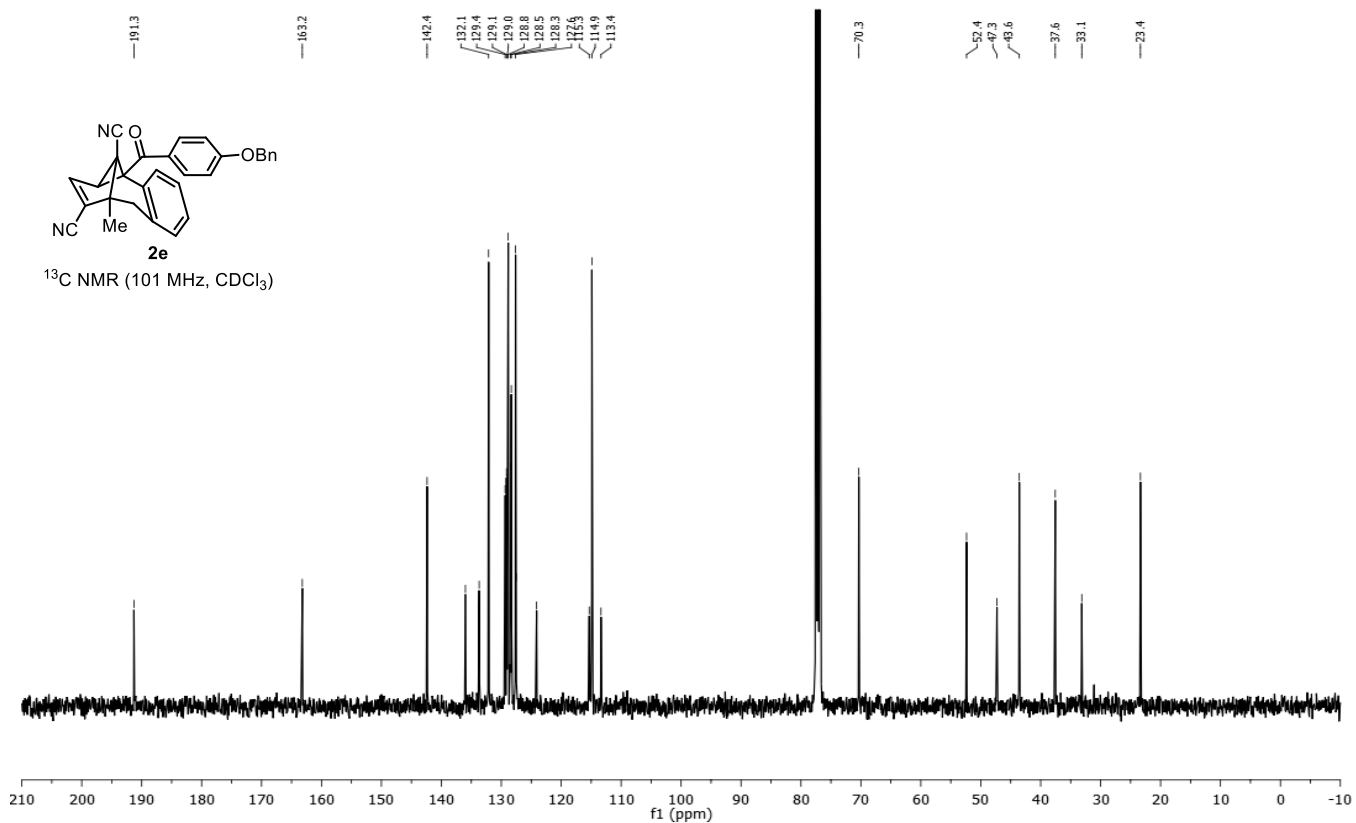



**4-(Allyloxy)benzoyl)-2a<sup>1</sup>-isocyano-2a-methyl-2a,2a<sup>1</sup>,7b,7c-tetrahydro-3H-benzo[*f*]cyclopropa[*cd*]indene-2-carbonitrile (2f):**

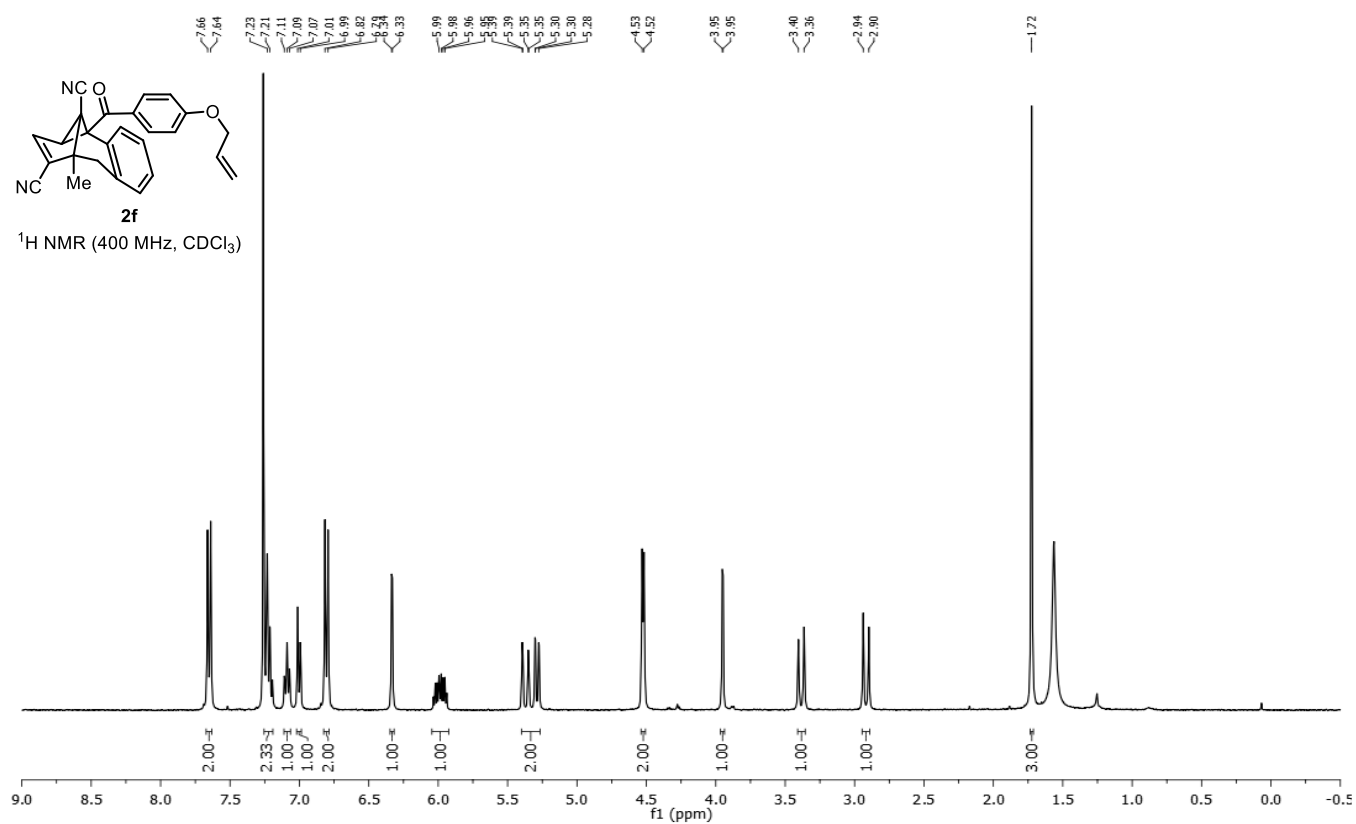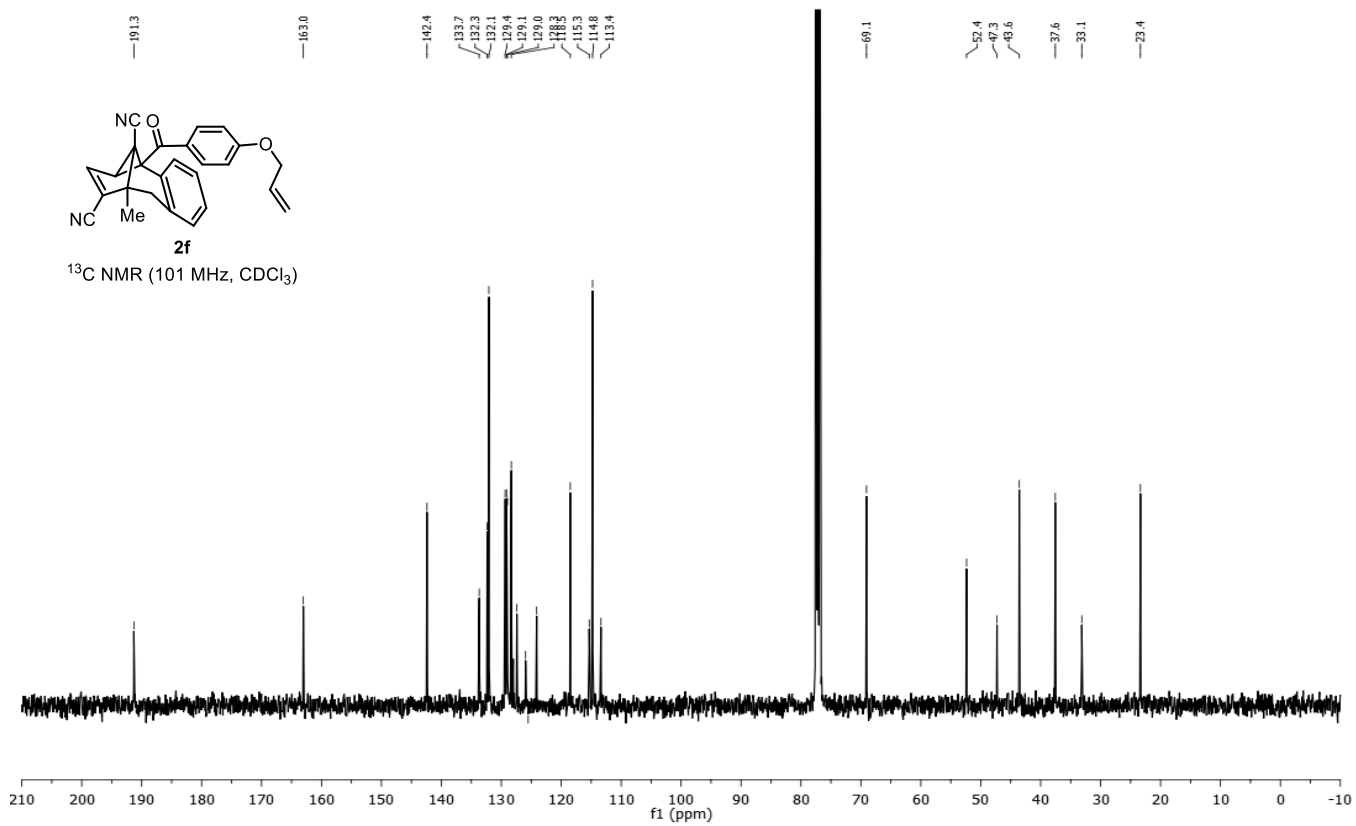

**4-((2-Bromoallyl)oxy)benzoyl)-2a<sup>1</sup>-isocyano-2a-methyl-2a,2a<sup>1</sup>,7b,7c-tetrahydro-3H-benzo[*f*]cyclopropa[*cd*]indene-2-carbonitrile (2g):**

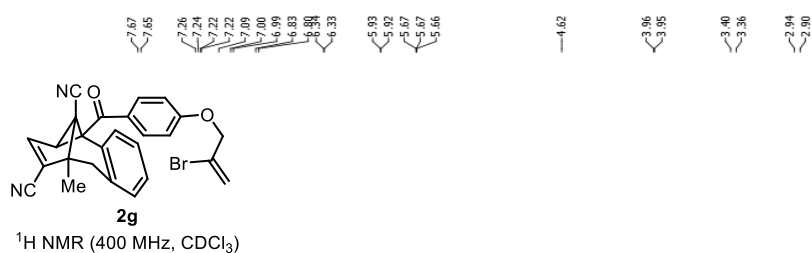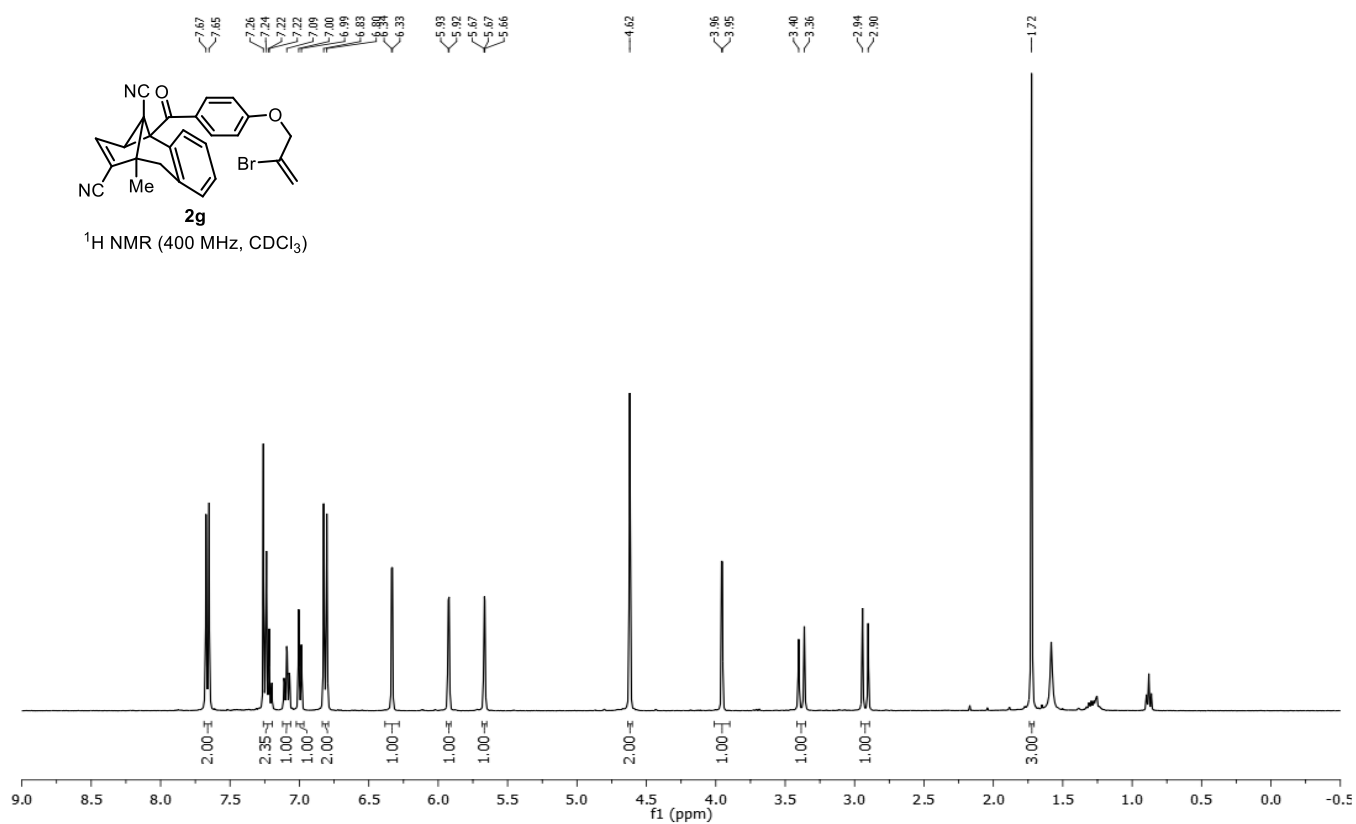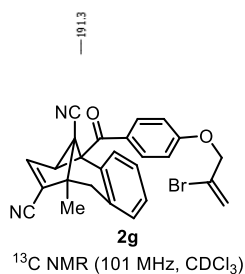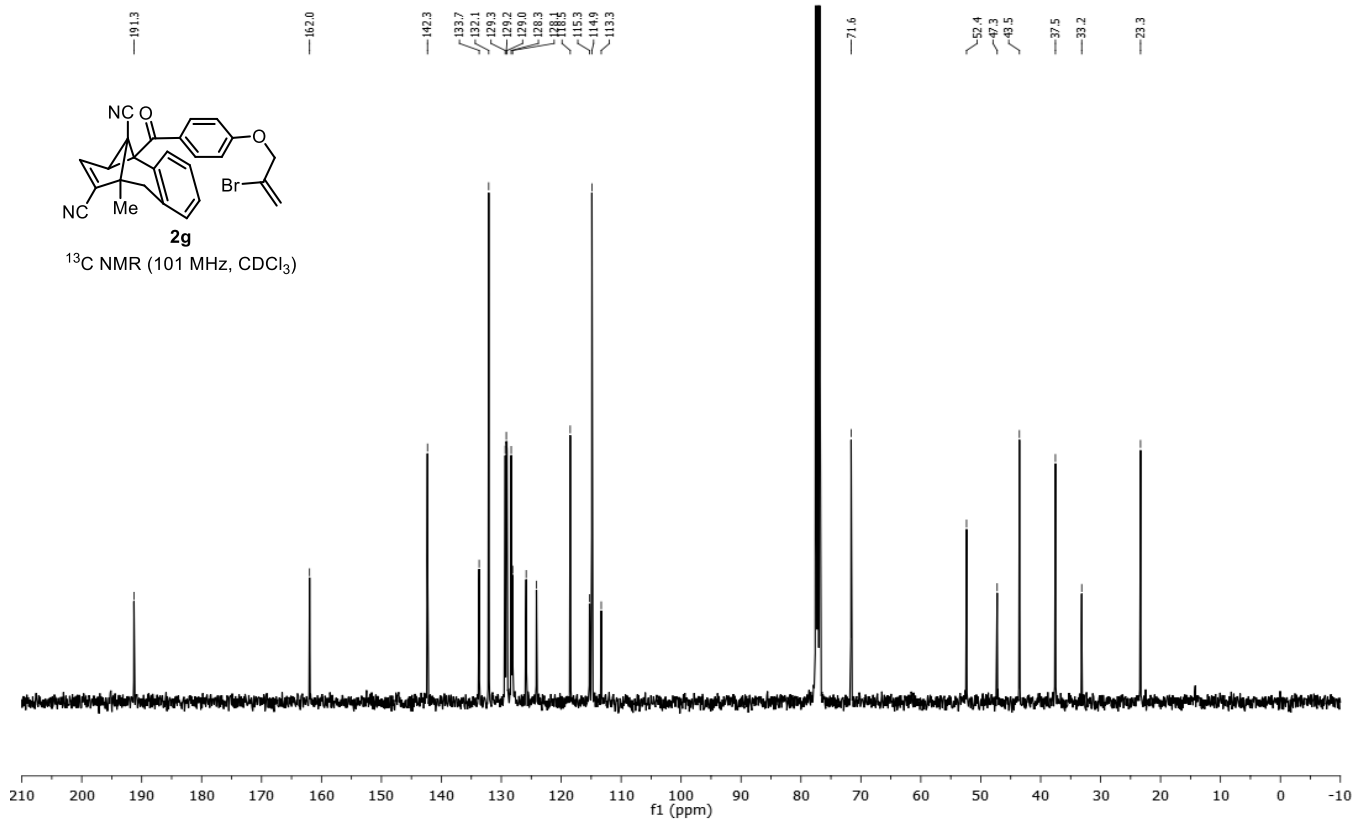

**4-Fluorobenzoyl-2a<sup>1</sup>-isocyano-2a-methyl-2a,2a<sup>1</sup>,7b,7c-tetrahydro-3H-benzo[*f*]cyclopropano[*cd*]indene-2-carbonitrile (2h):**

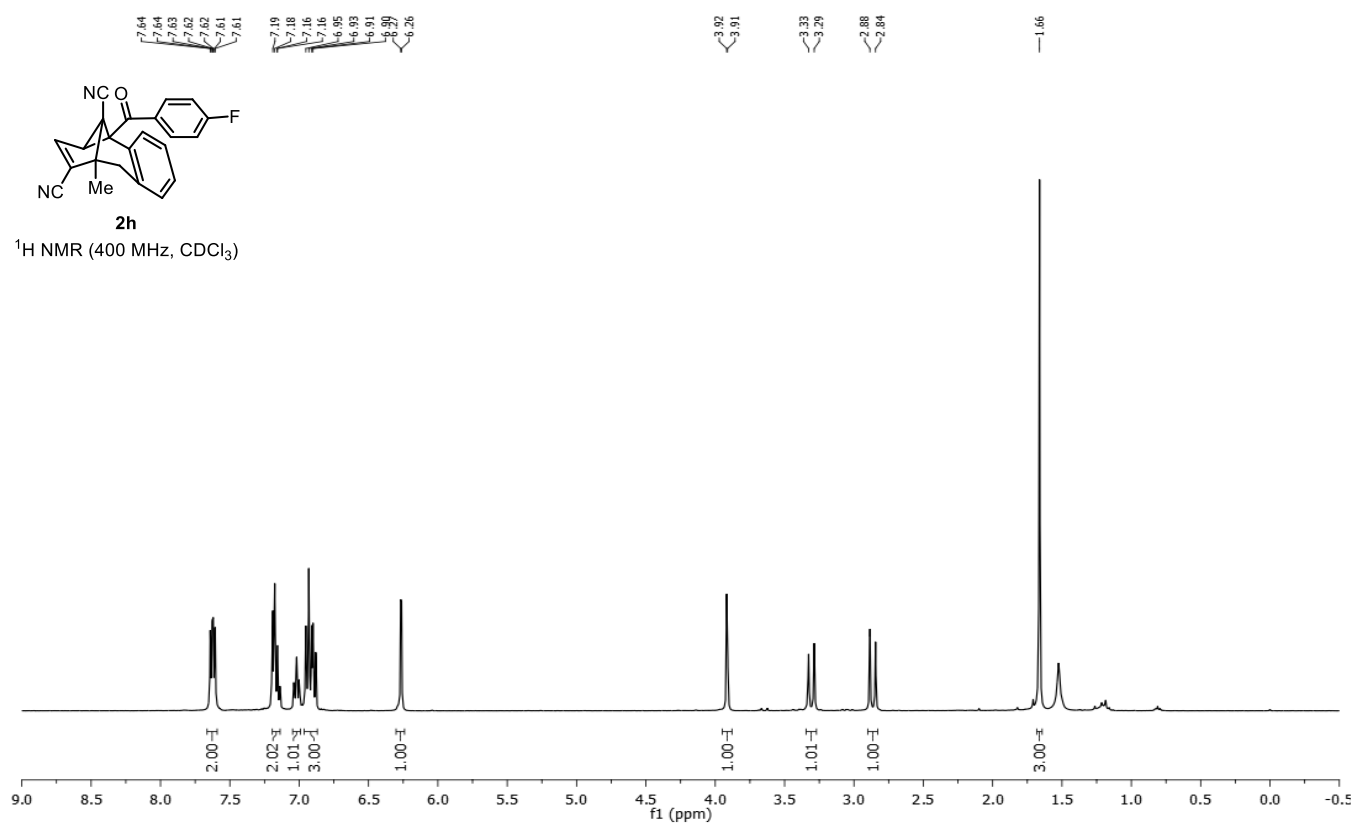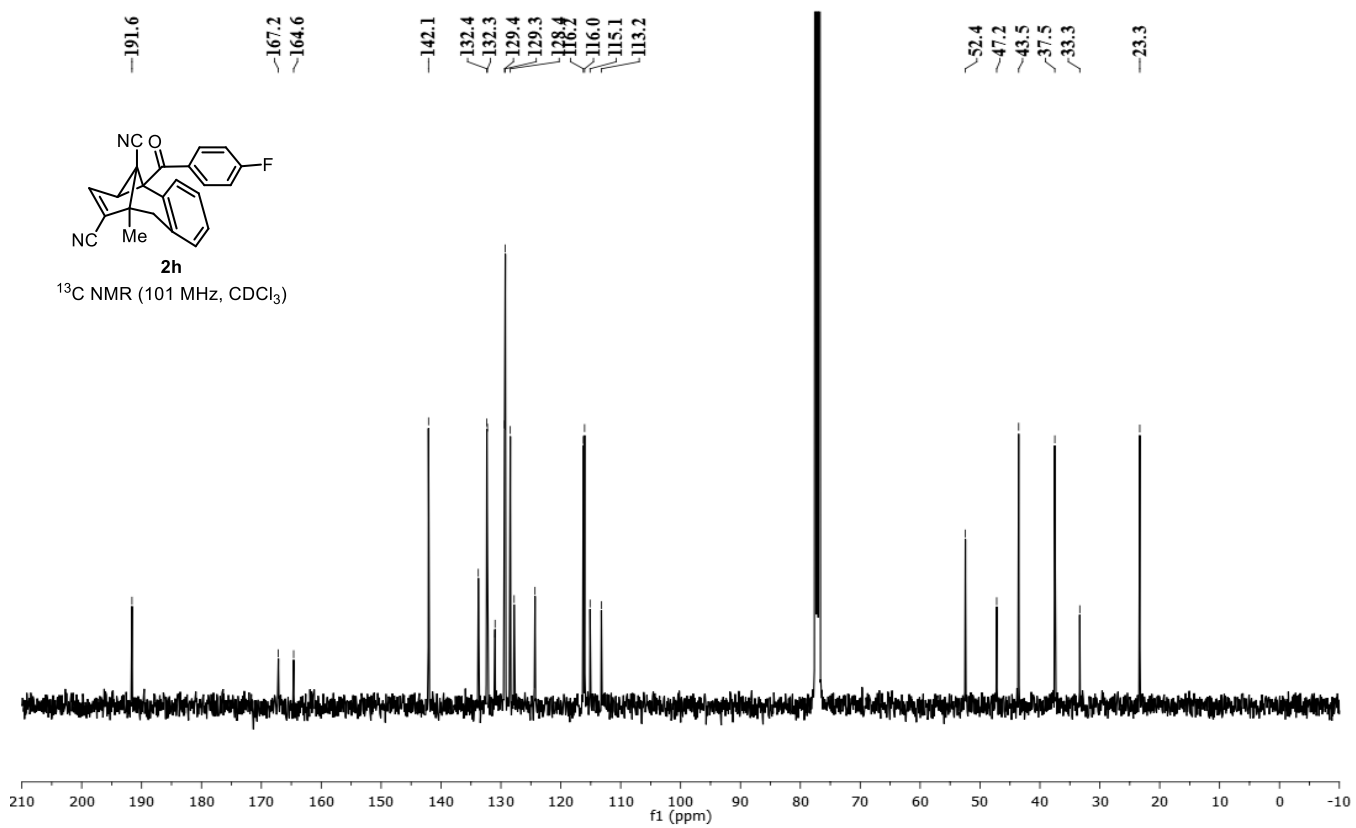

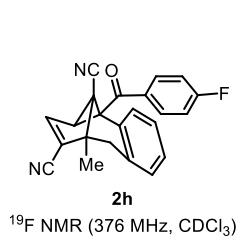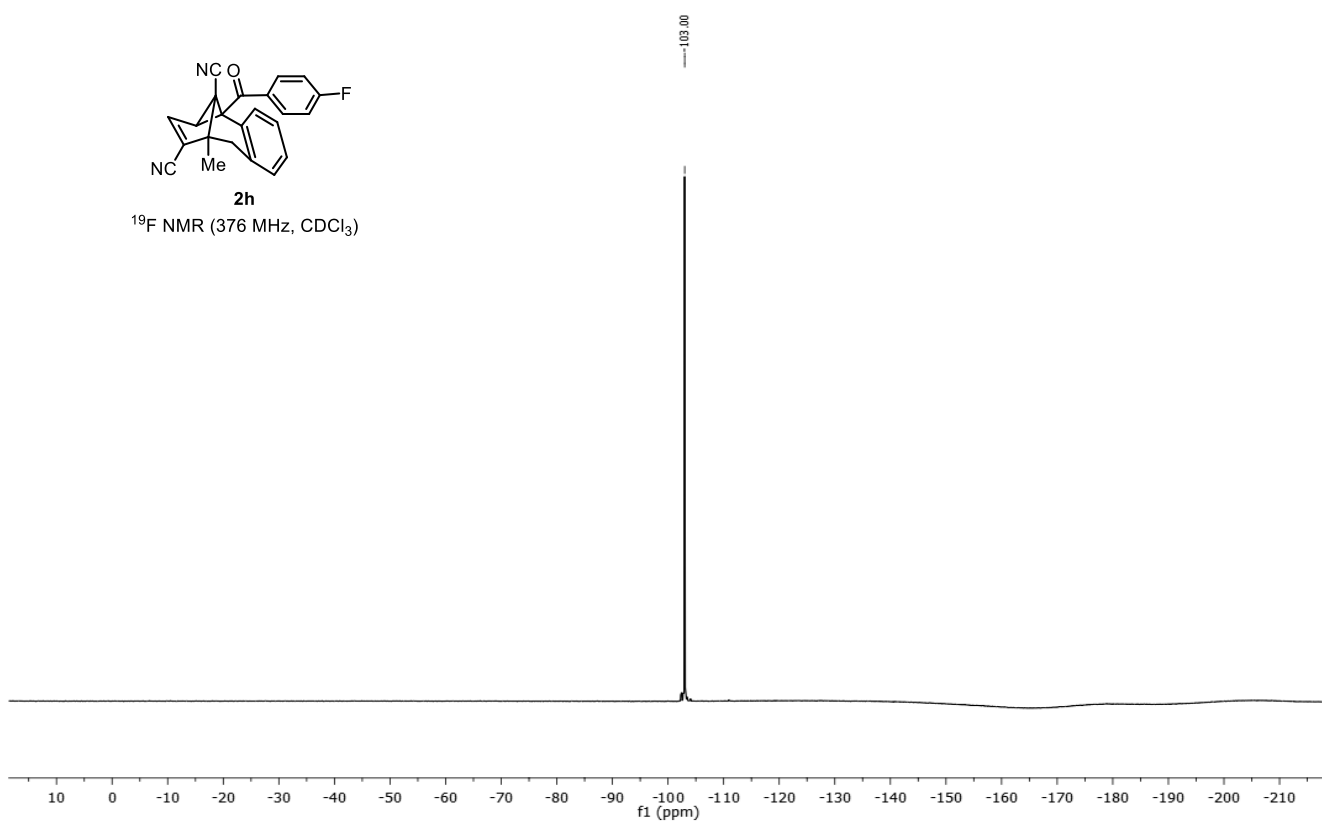

**4-Chlorobenzoyl-2a<sup>1</sup>-isocyano-2a-methyl-2a,2a<sup>1</sup>,7b,7c-tetrahydro-3H-benzo[*f*]cyclopropano[*cd*]indene-2-carbonitrile (2i):**

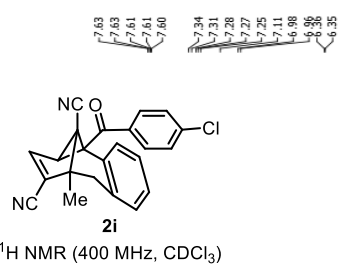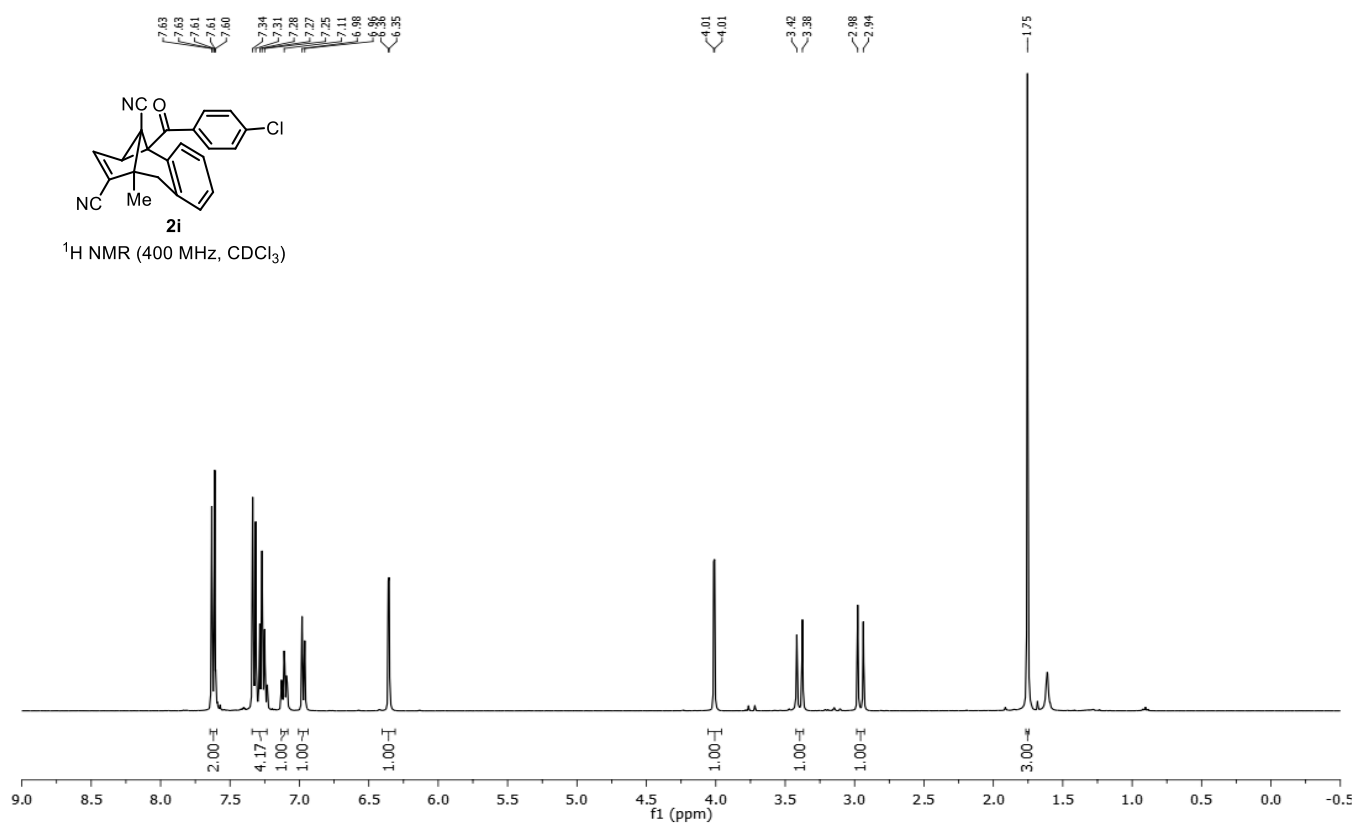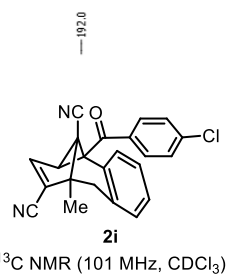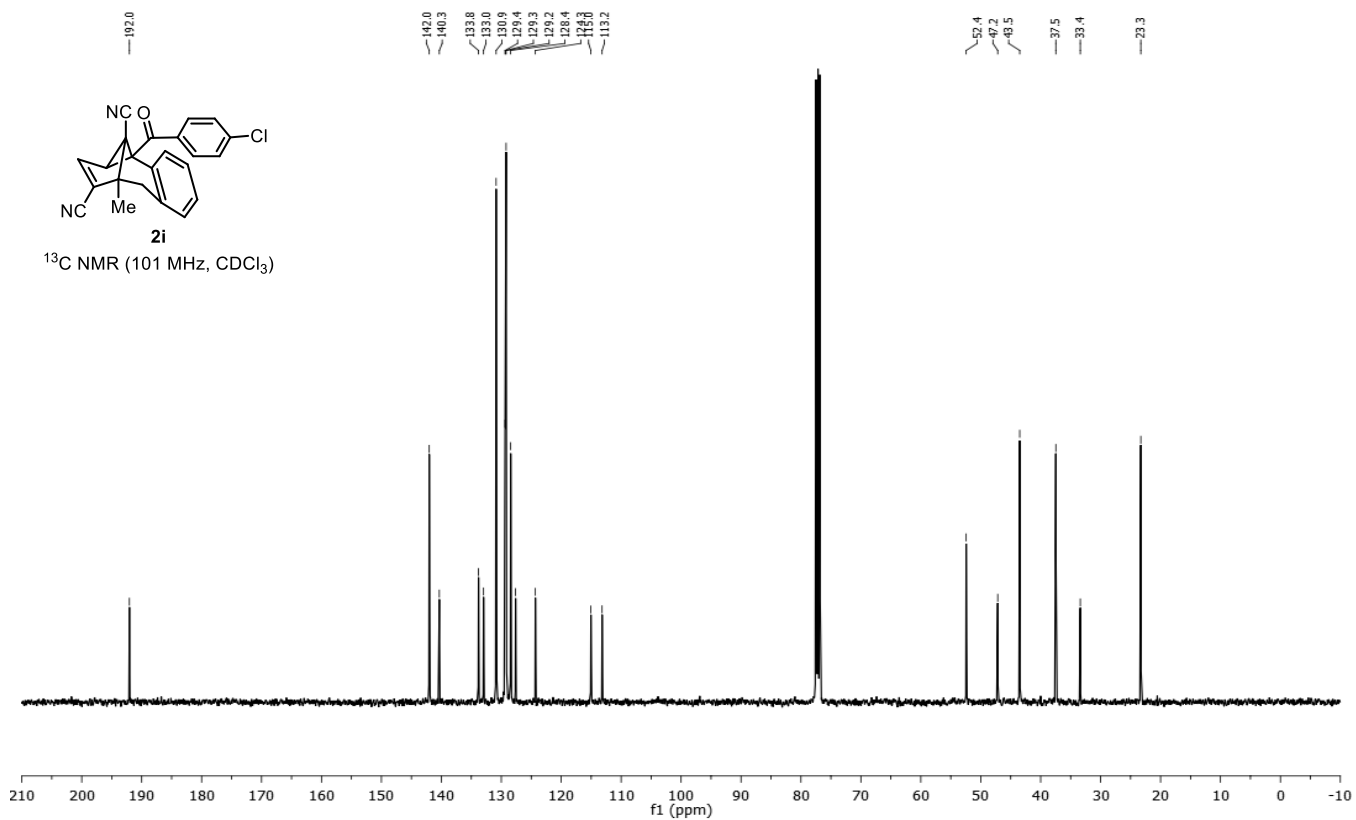

**4-Bromobenzoyl-2a<sup>1</sup>-isocyano-2a-methyl-2a,2a<sup>1</sup>,7b,7c-tetrahydro-3H-benzo[*f*]cyclopropano[*cd*]indene-2-carbonitrile (2j):**

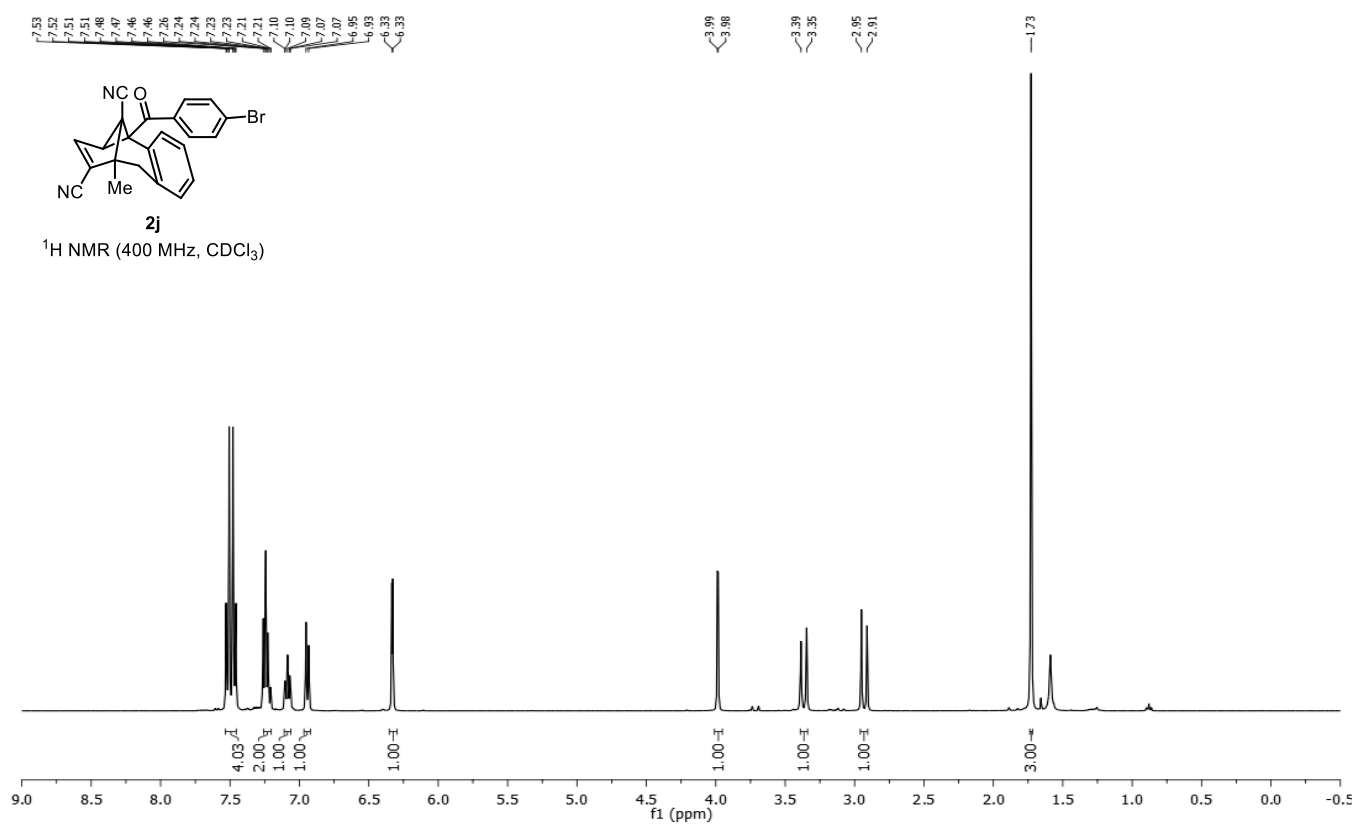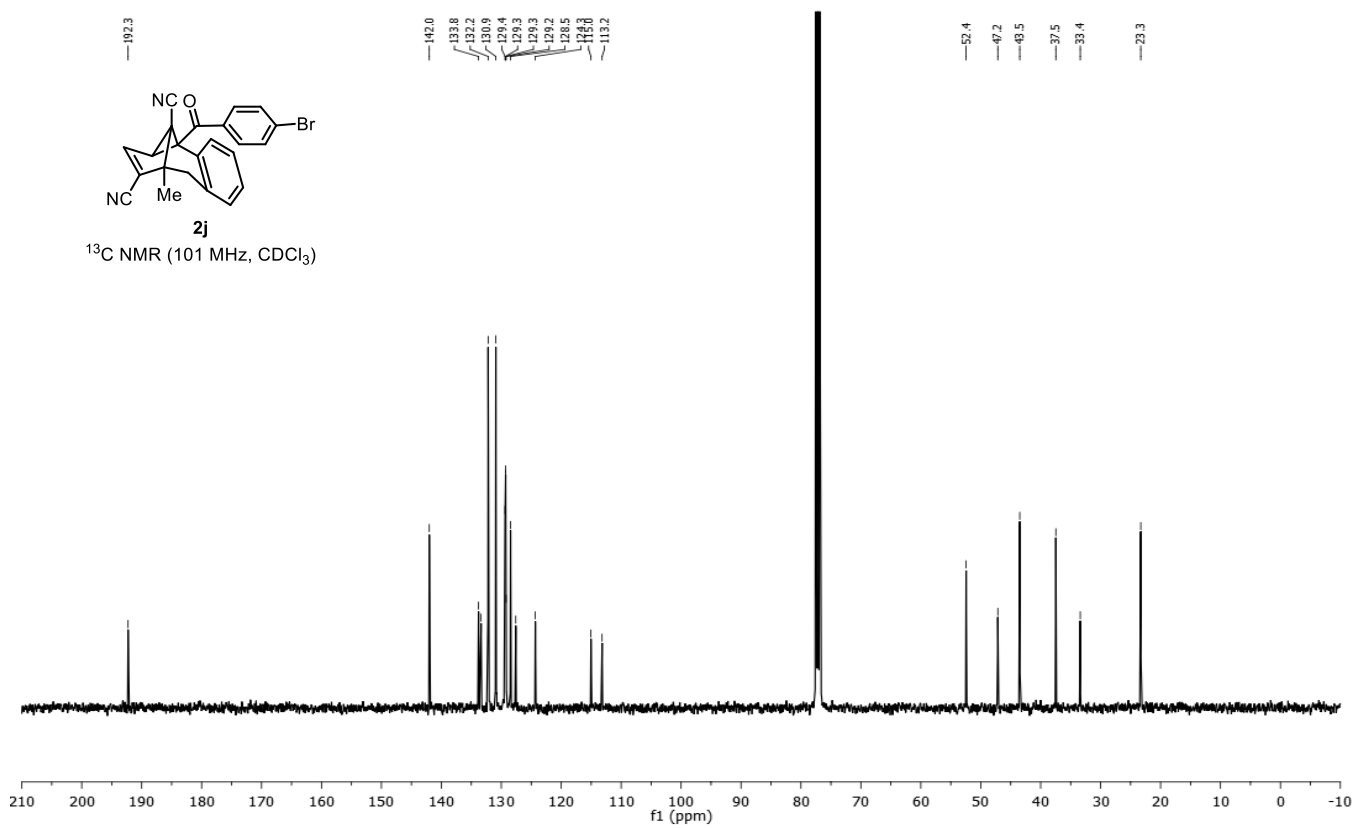

**2-(2-(2-(4-Bromophenyl)-2-oxoacetyl)benzyl)-2-methylcyclopenta-3,5-diene-1,3-dicarbonitrile (3j):**

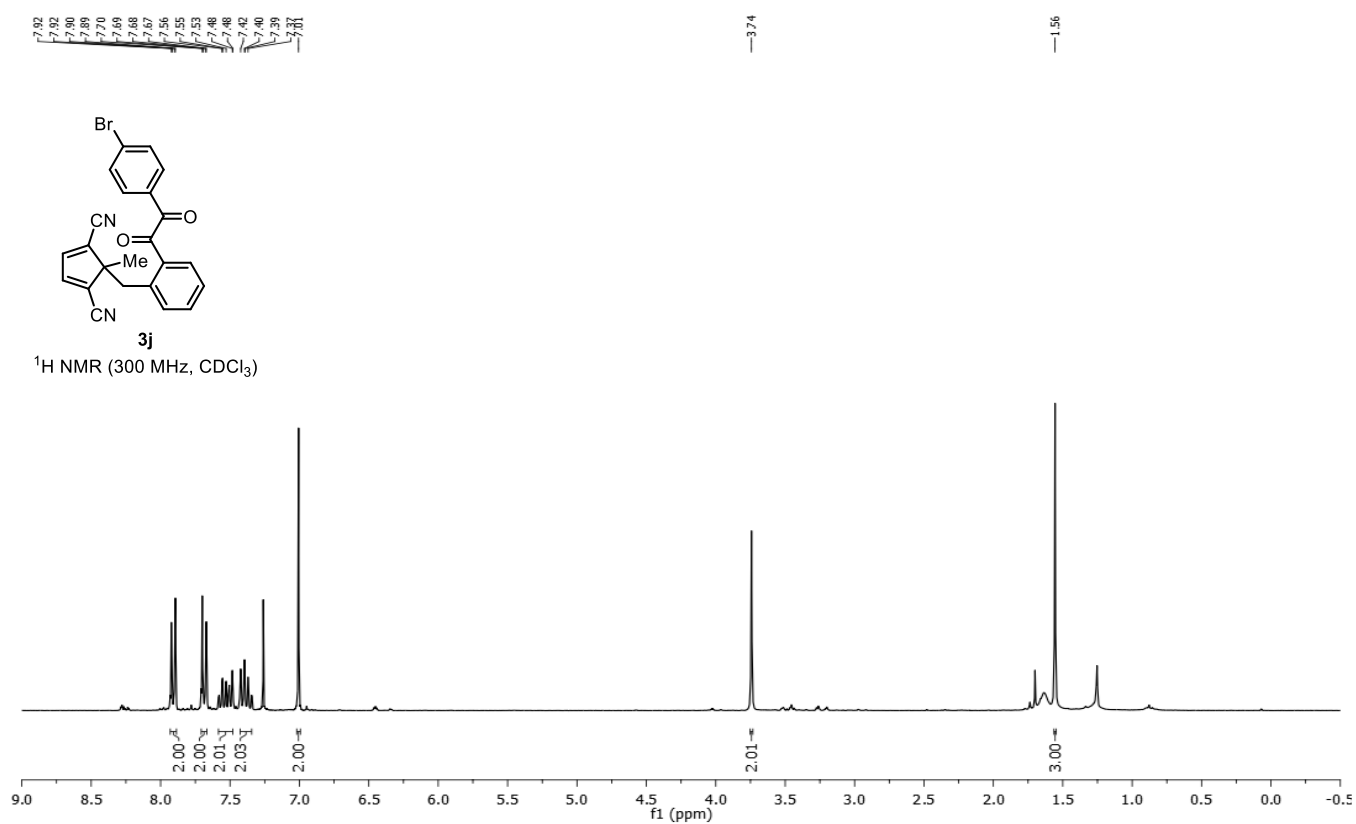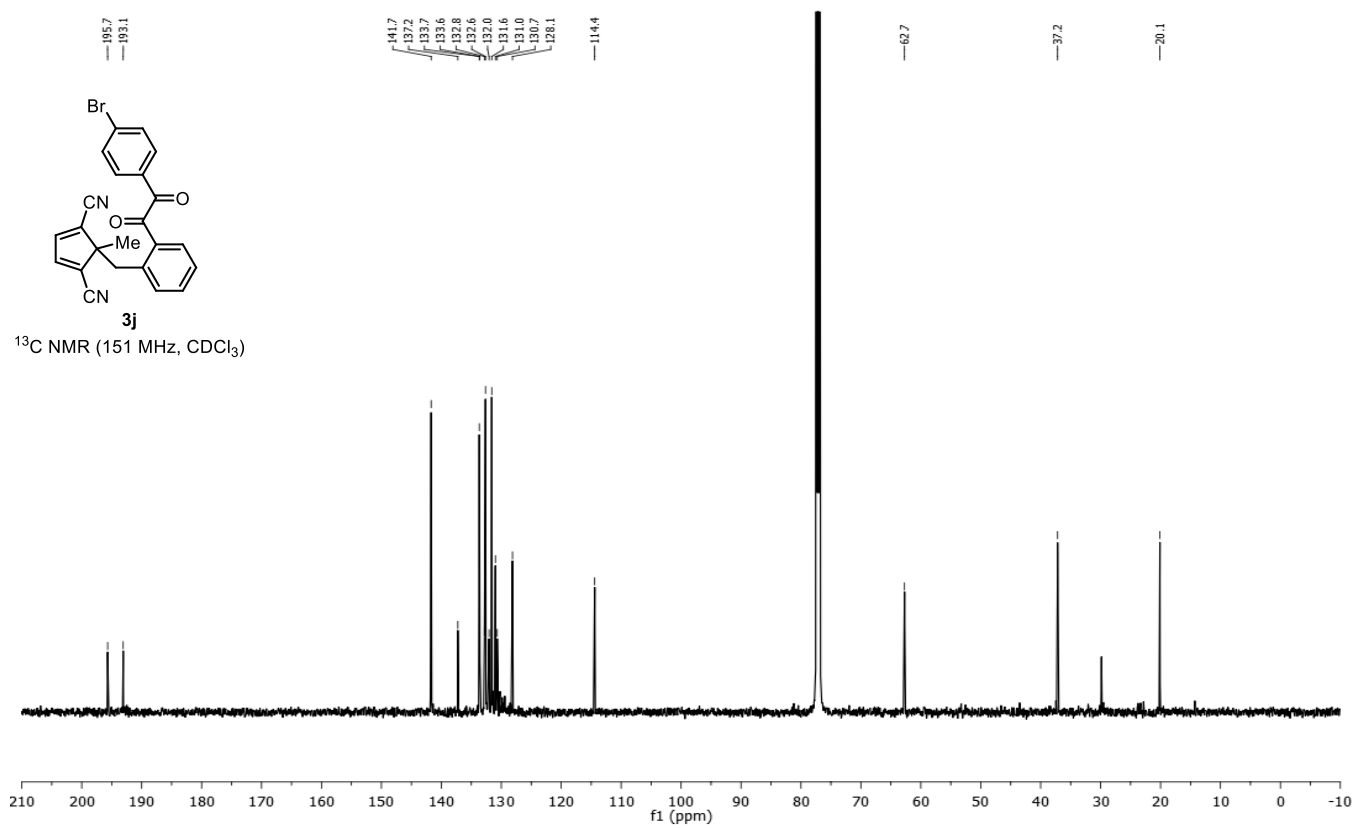





**2a<sup>1</sup>-Isocyano-2a-methyl-7b-(4-phenoxybenzoyl)-2a,2a<sup>1</sup>,7b,7c-tetrahydro-3H-benzo[*f*]cyclopropa[*cd*]indene-2-carbonitrile (2l):**

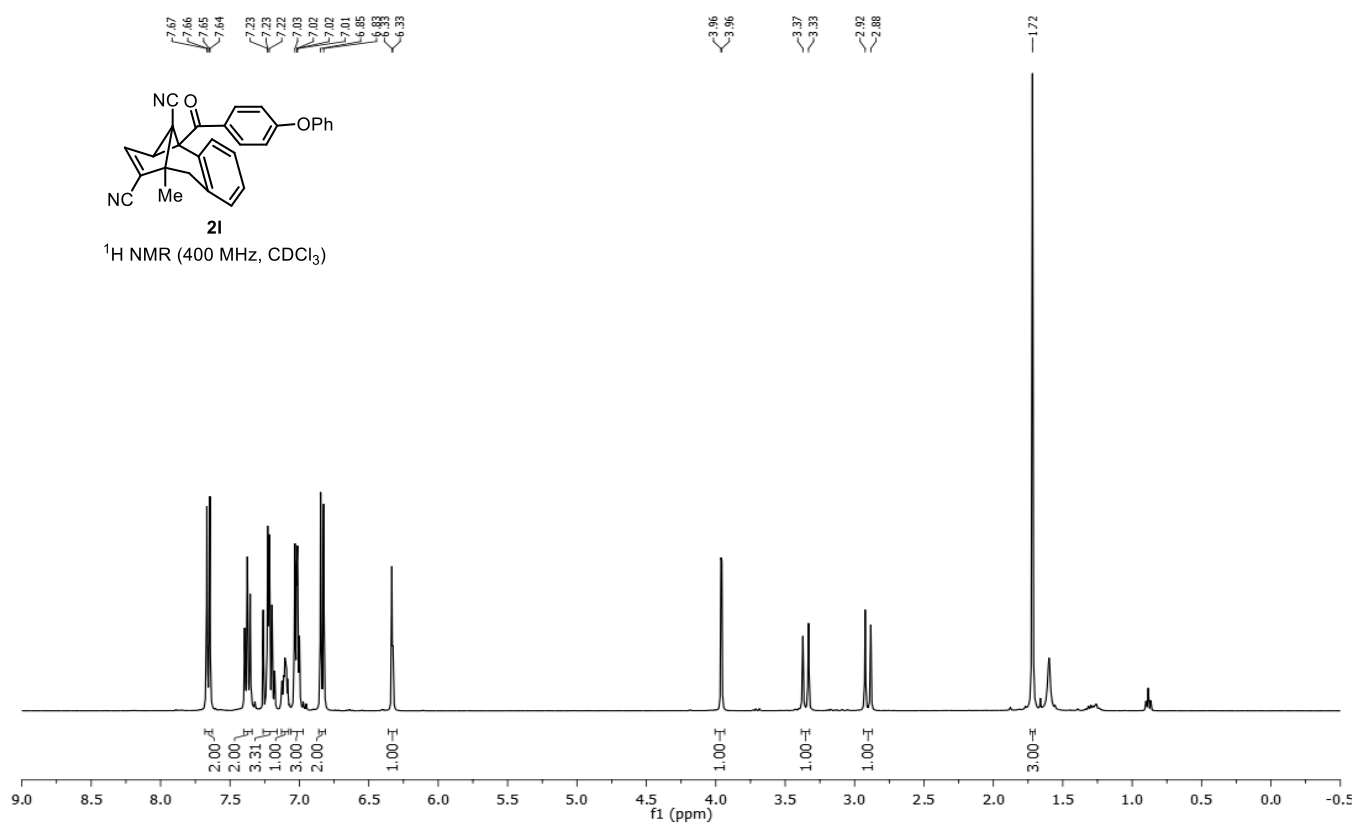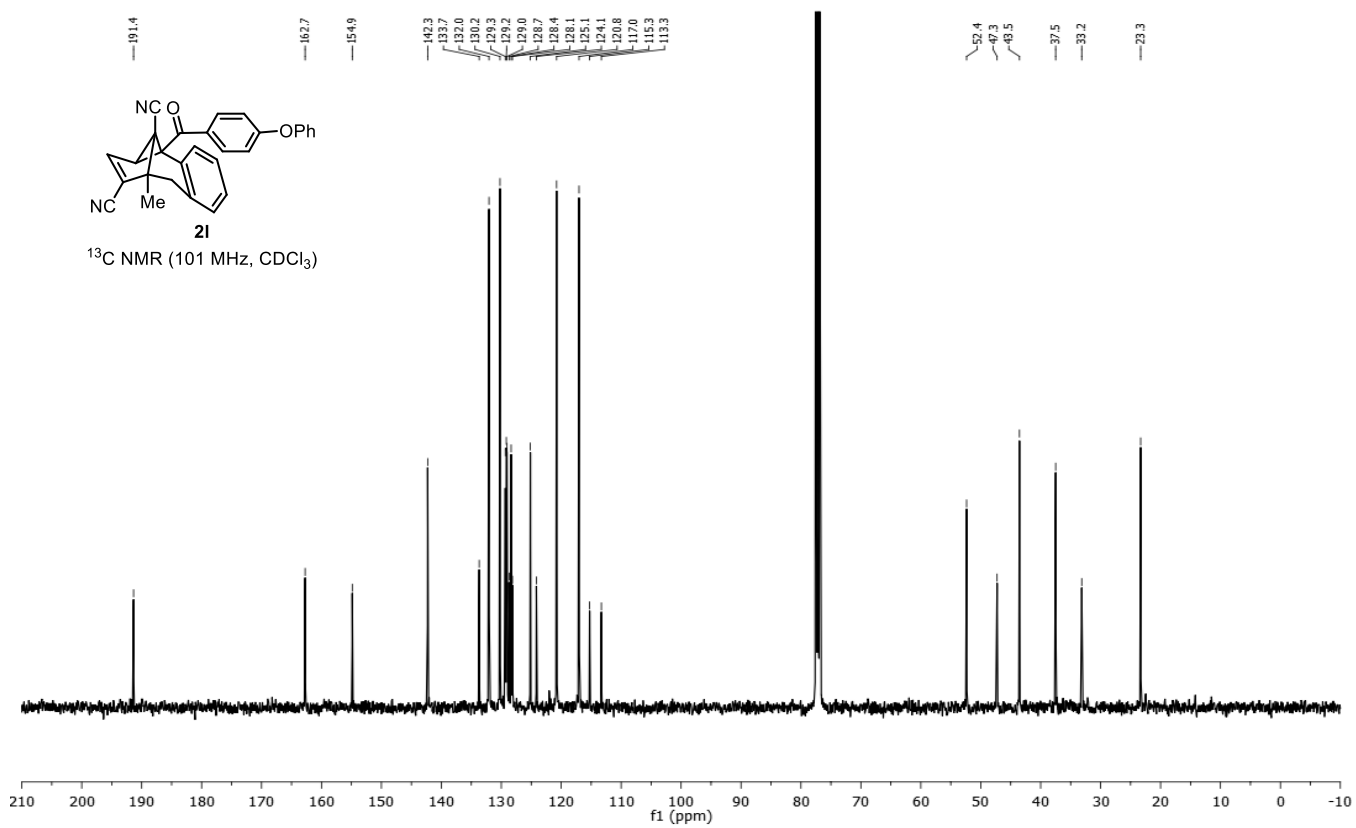

**2a<sup>1</sup>-Isocyano-2a-methyl-7b-(4-(trifluoromethyl)benzoyl)-2a,2a<sup>1</sup>,7b,7c-tetrahydro-3H-benzo[*f*]cyclopropano[*cd*]indene-2-carbonitrile (2m):**

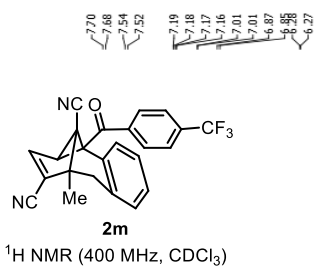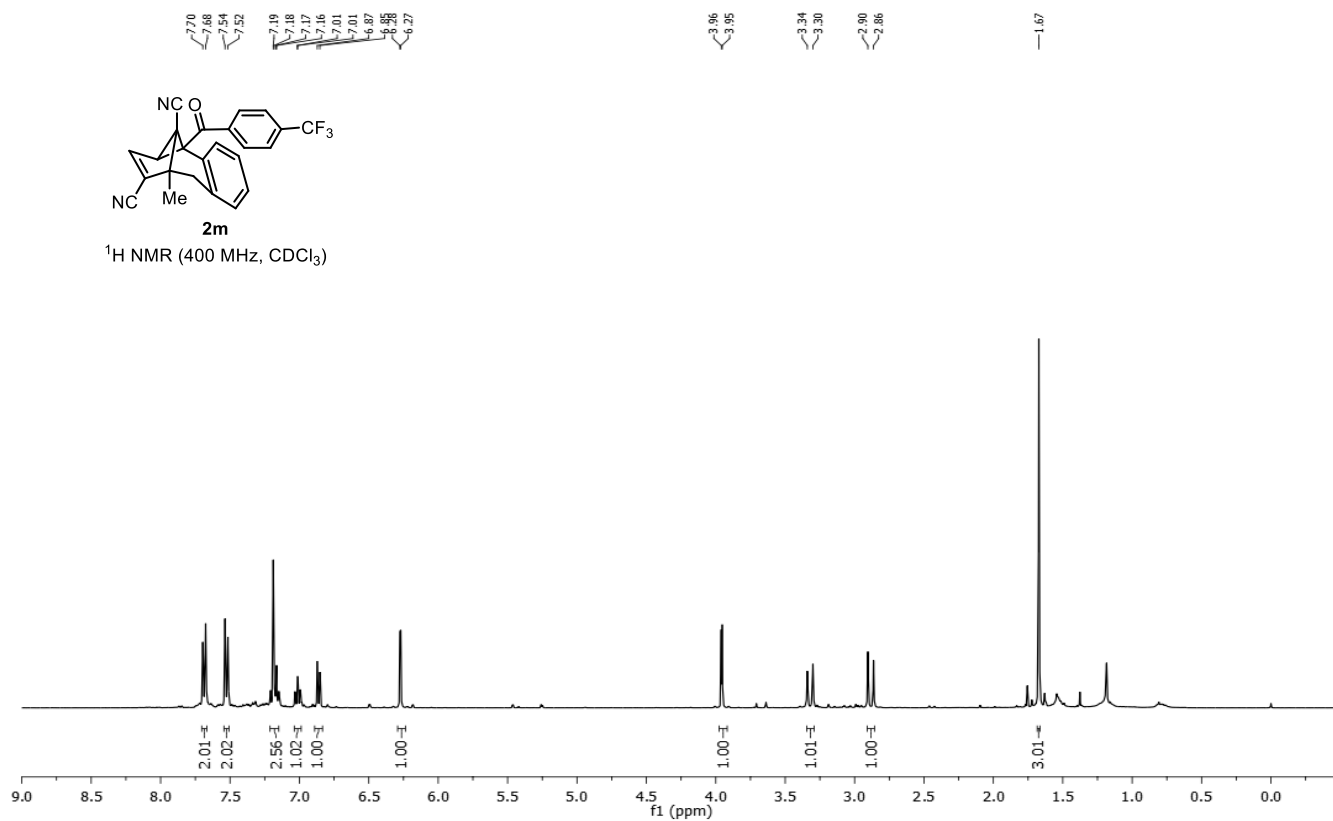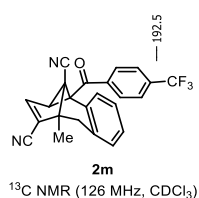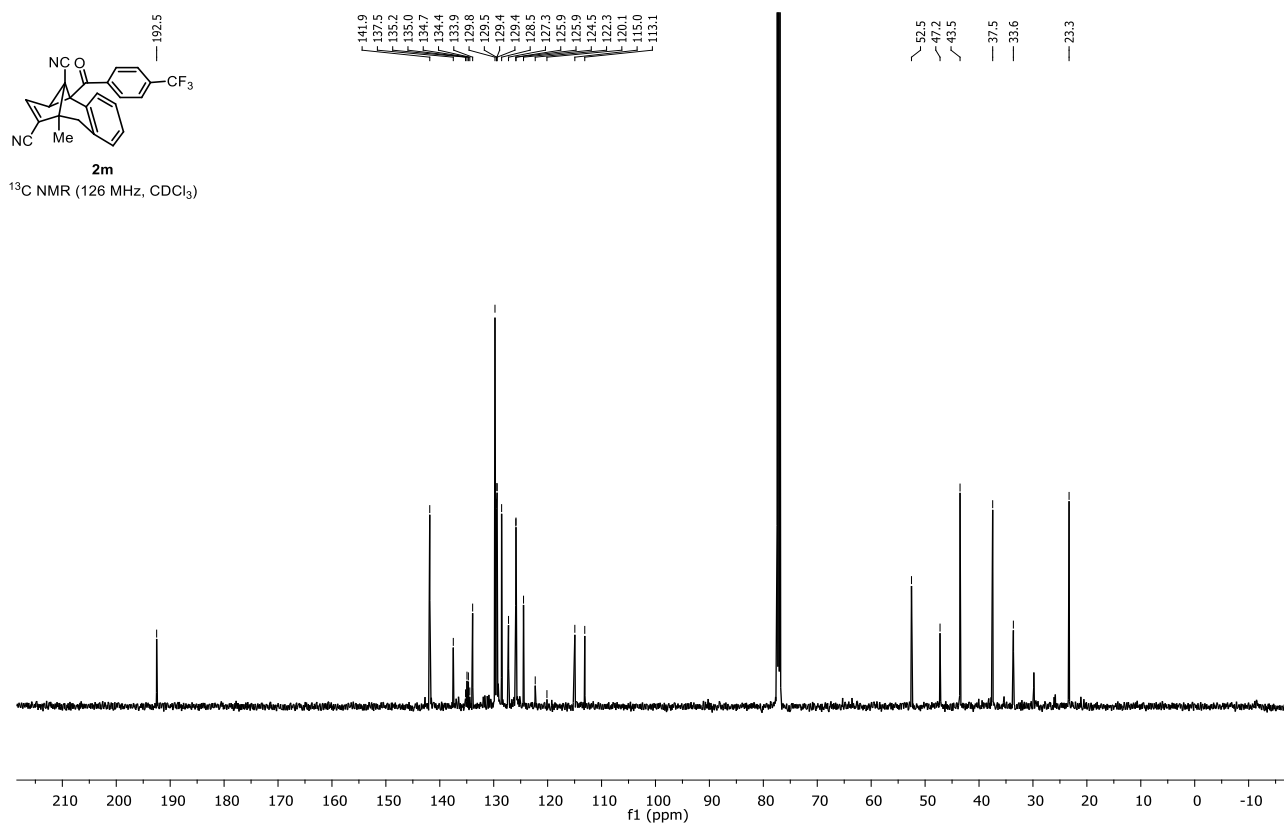

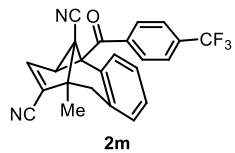

$^{19}\text{F}$  NMR (377 MHz,  $\text{CDCl}_3$ )

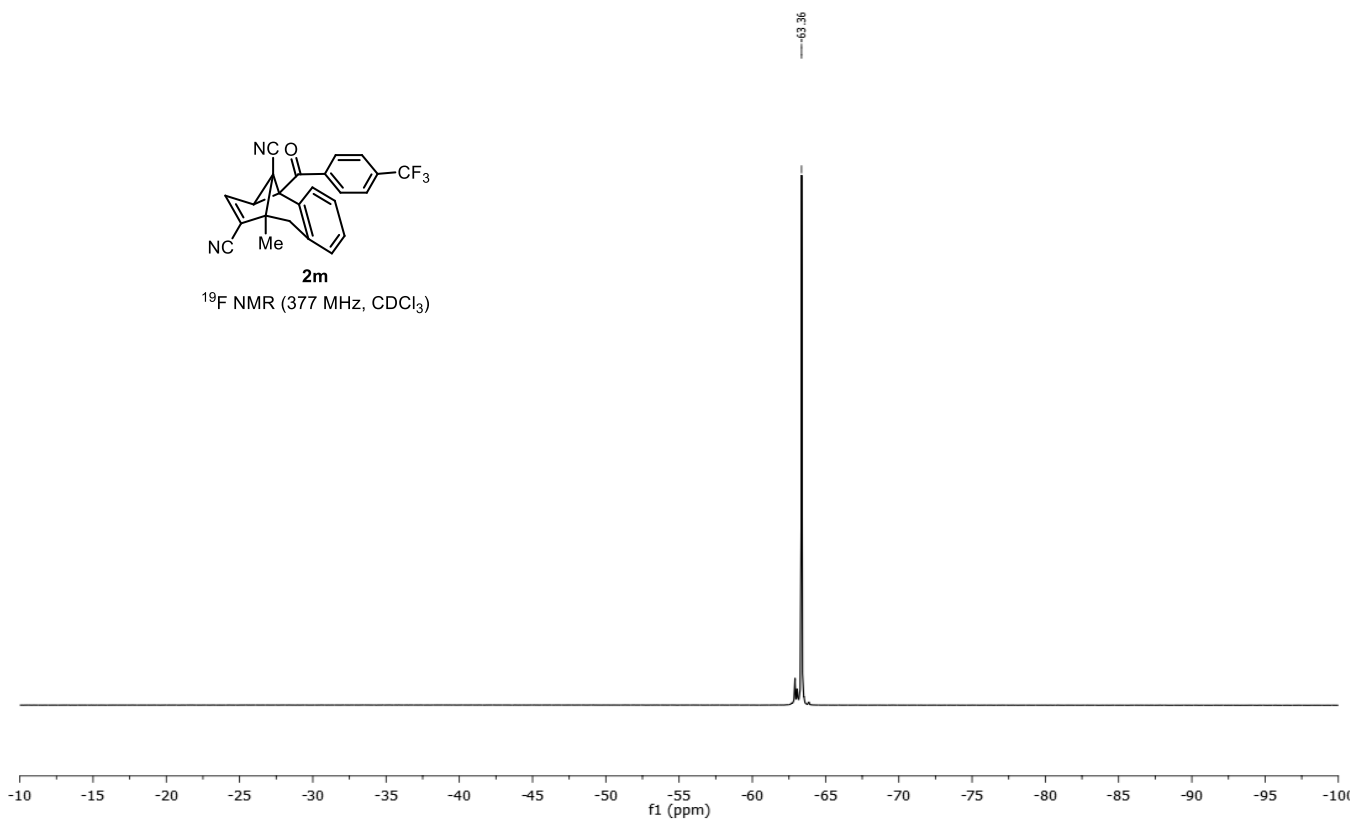

**Methyl 2-cyano-2a<sup>1</sup>-isocyano-2a-methyl-2a,2a<sup>1</sup>,7b,7c-tetrahydro-3H-benzo[*f*]cyclopropa[*cd*]indene-7b-carbonyl benzoate (2n):**

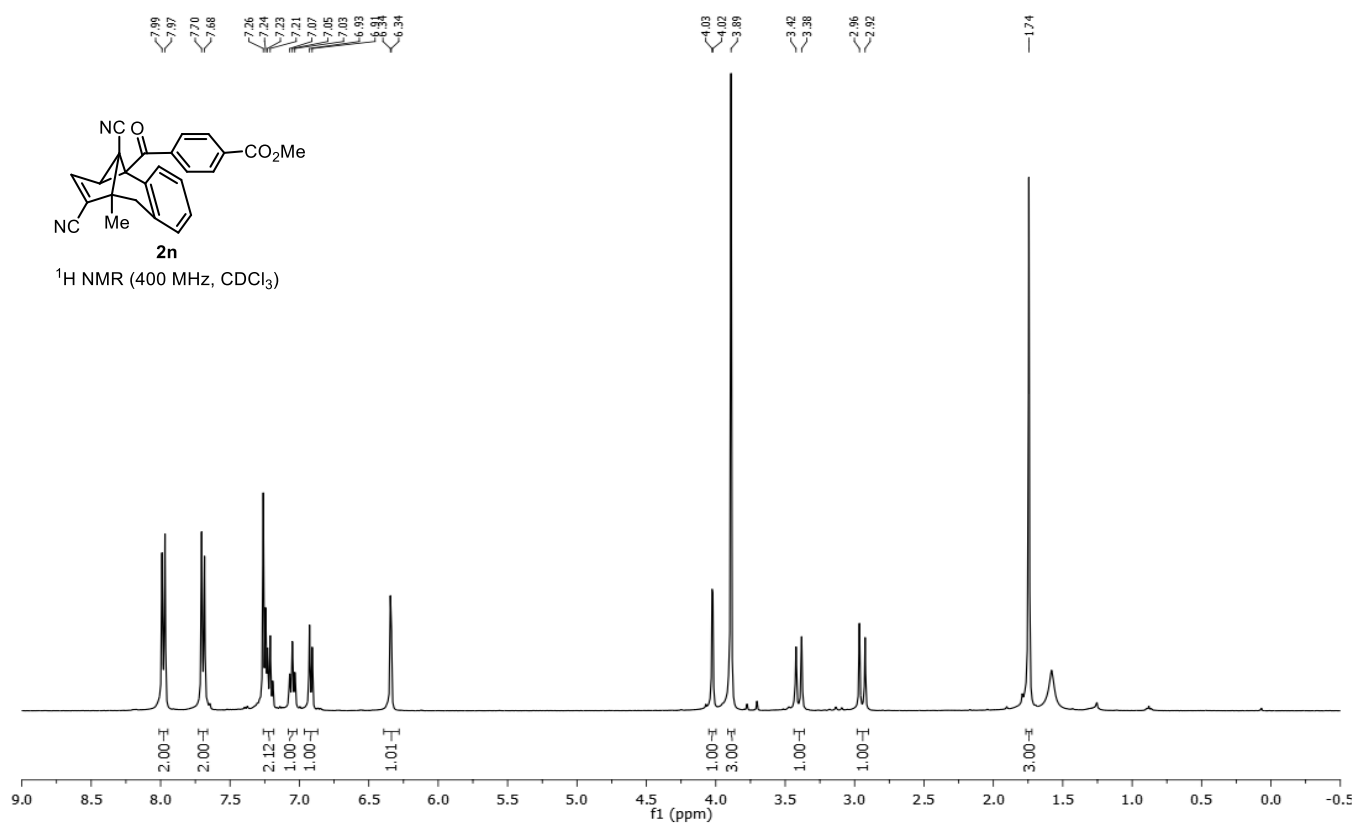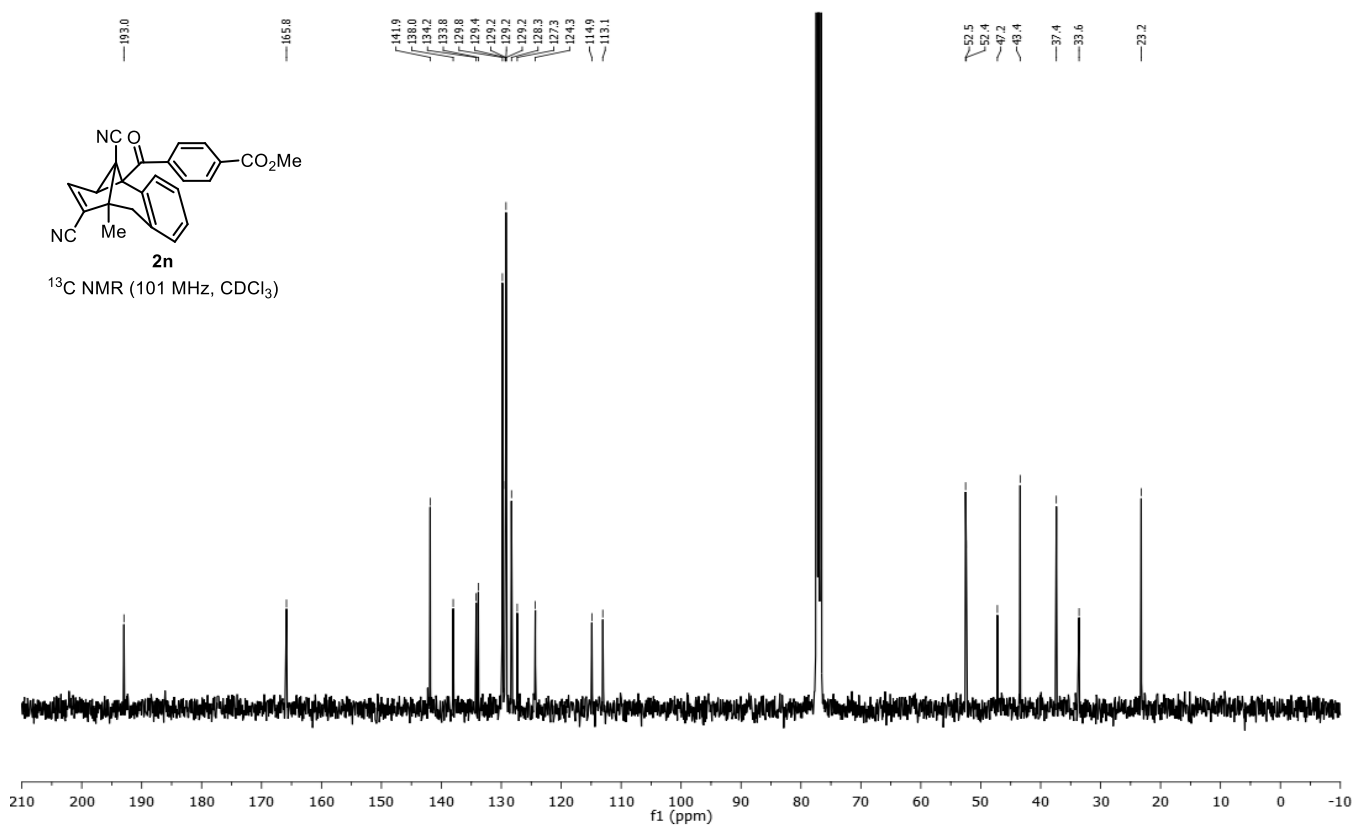

**4-Cyanobenzoyl-2a<sup>1</sup>-isocyano-2a-methyl-2a,2a<sup>1</sup>,7b,7c-tetrahydro-3H-benzo[*f*]cyclopropano[*cd*]indene-2-carbonitrile (2o):**

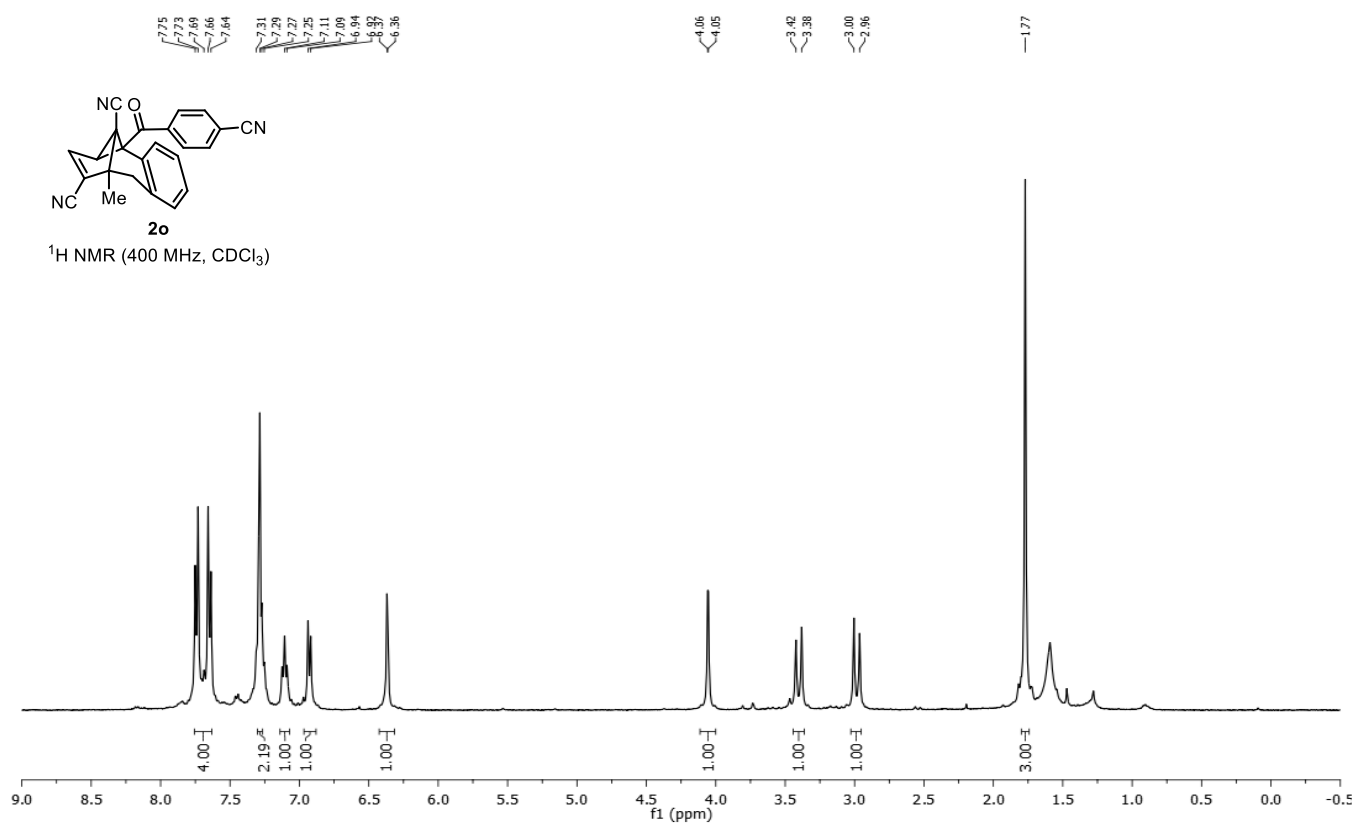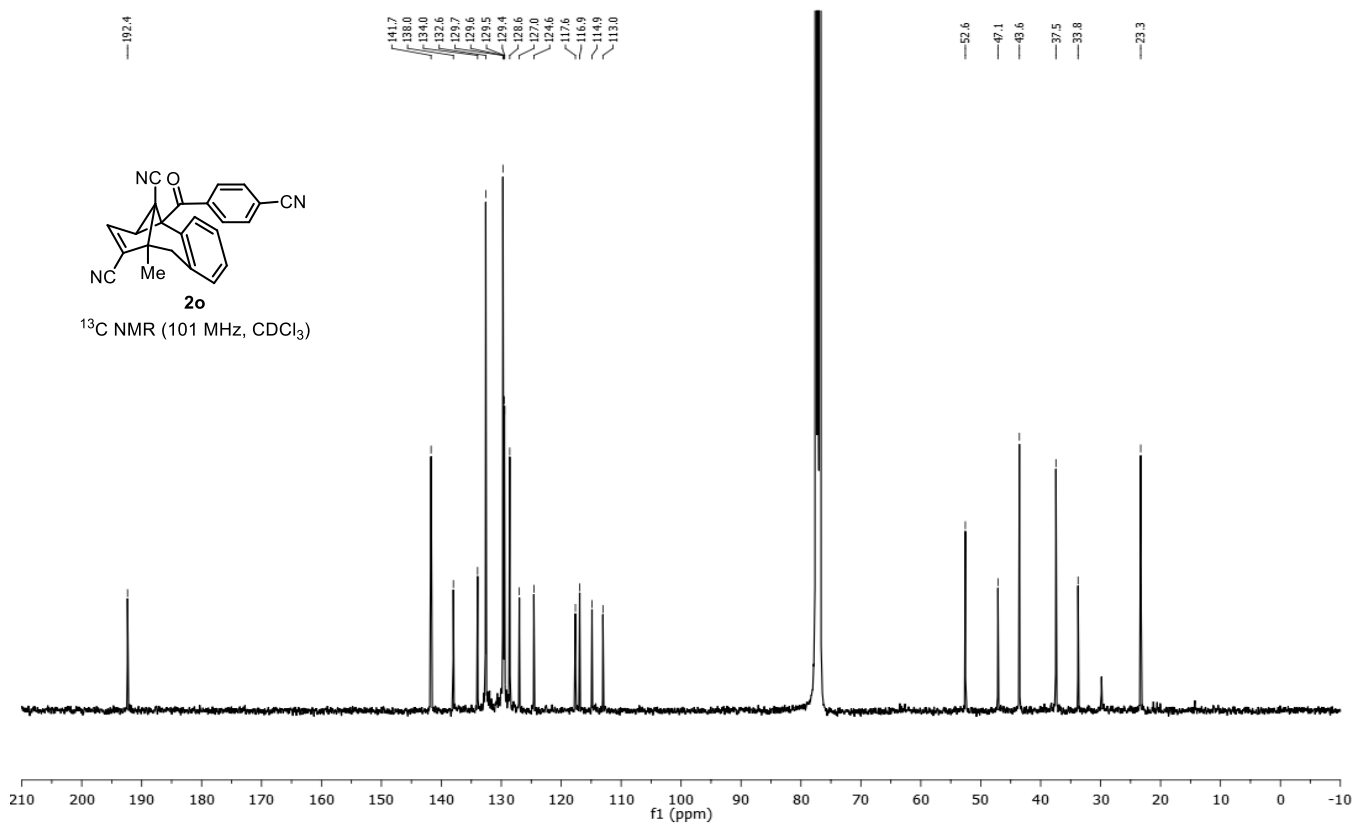

**3-Chlorobenzoyl-2a<sup>1</sup>-isocyano-2a-methyl-2a,2a<sup>1</sup>,7b,7c-tetrahydro-3H-benzo[*f*]cyclopropa[*cd*]indene-2-carbonitrile (2p):**

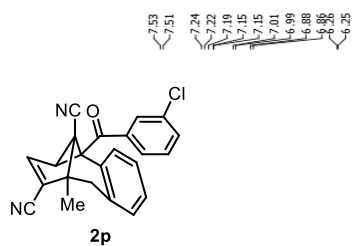

**2p**  
<sup>1</sup>H NMR (400 MHz, CDCl<sub>3</sub>)

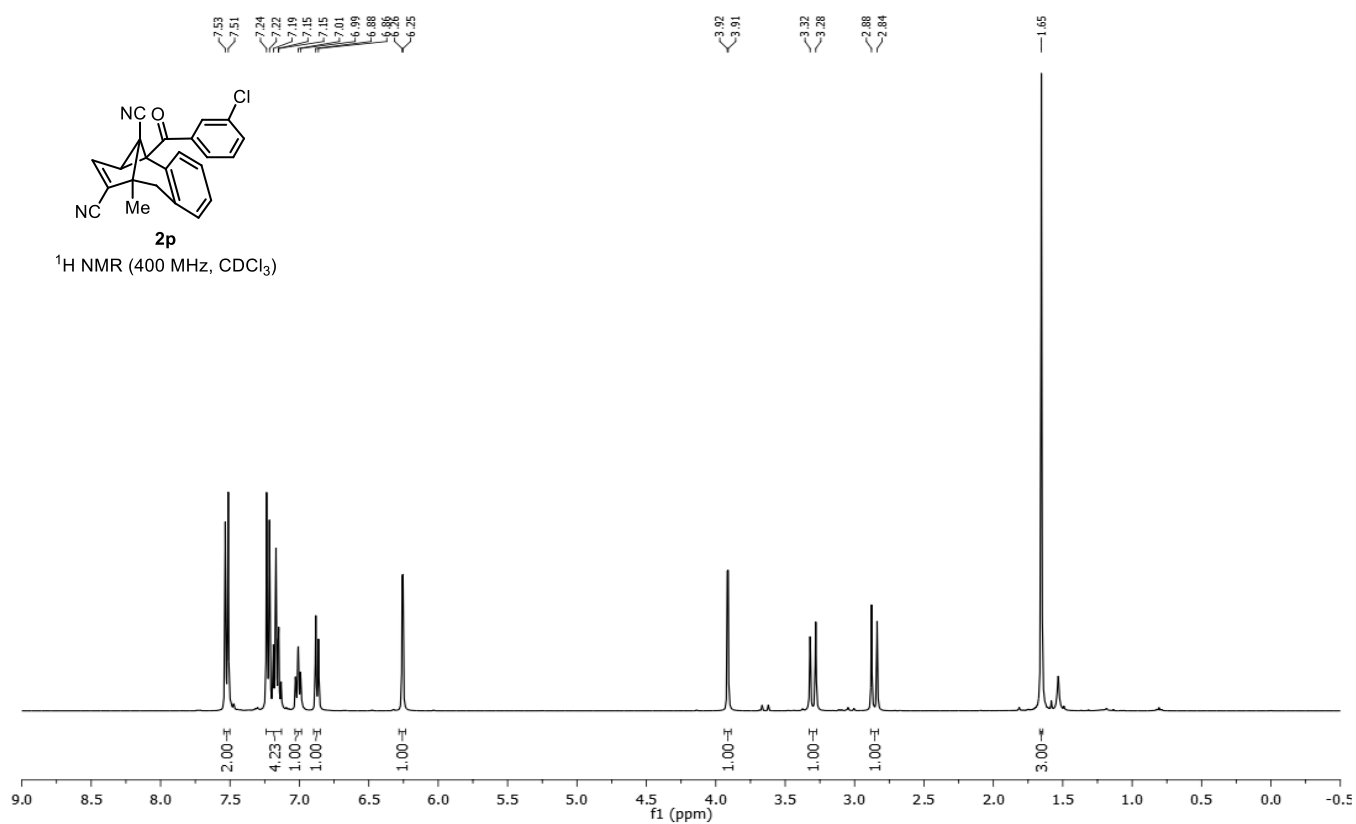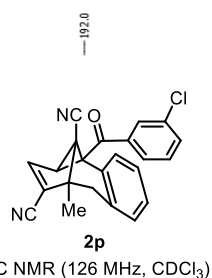

**2p**  
<sup>13</sup>C NMR (126 MHz, CDCl<sub>3</sub>)

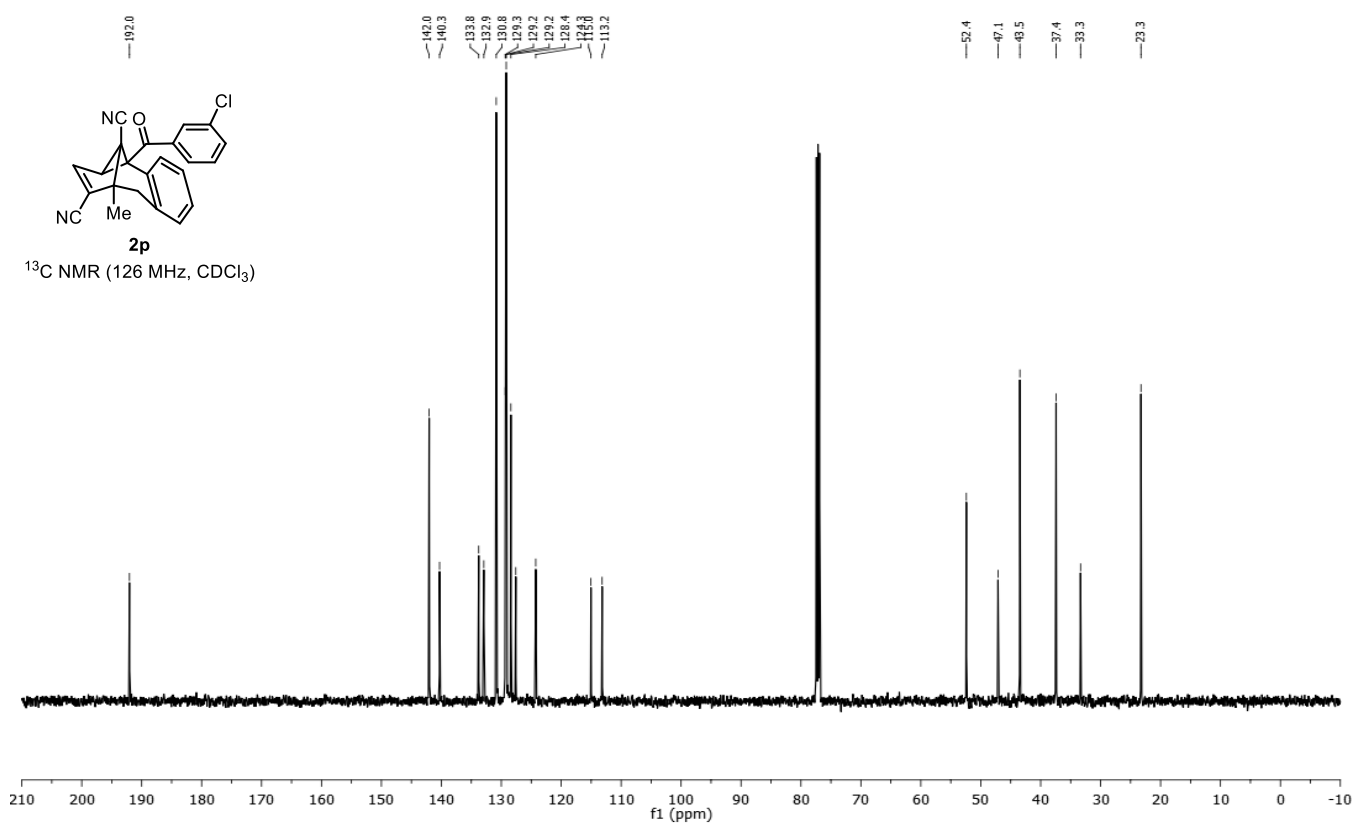

**2a<sup>1</sup>-Isocyano-2a-methyl-7b-(3-methylbenzoyl)-2a,2a<sup>1</sup>,7b,7c-tetrahydro-3H-benzo[*f*]cyclopropa[*cd*]indene-2-carbonitrile (2q):**

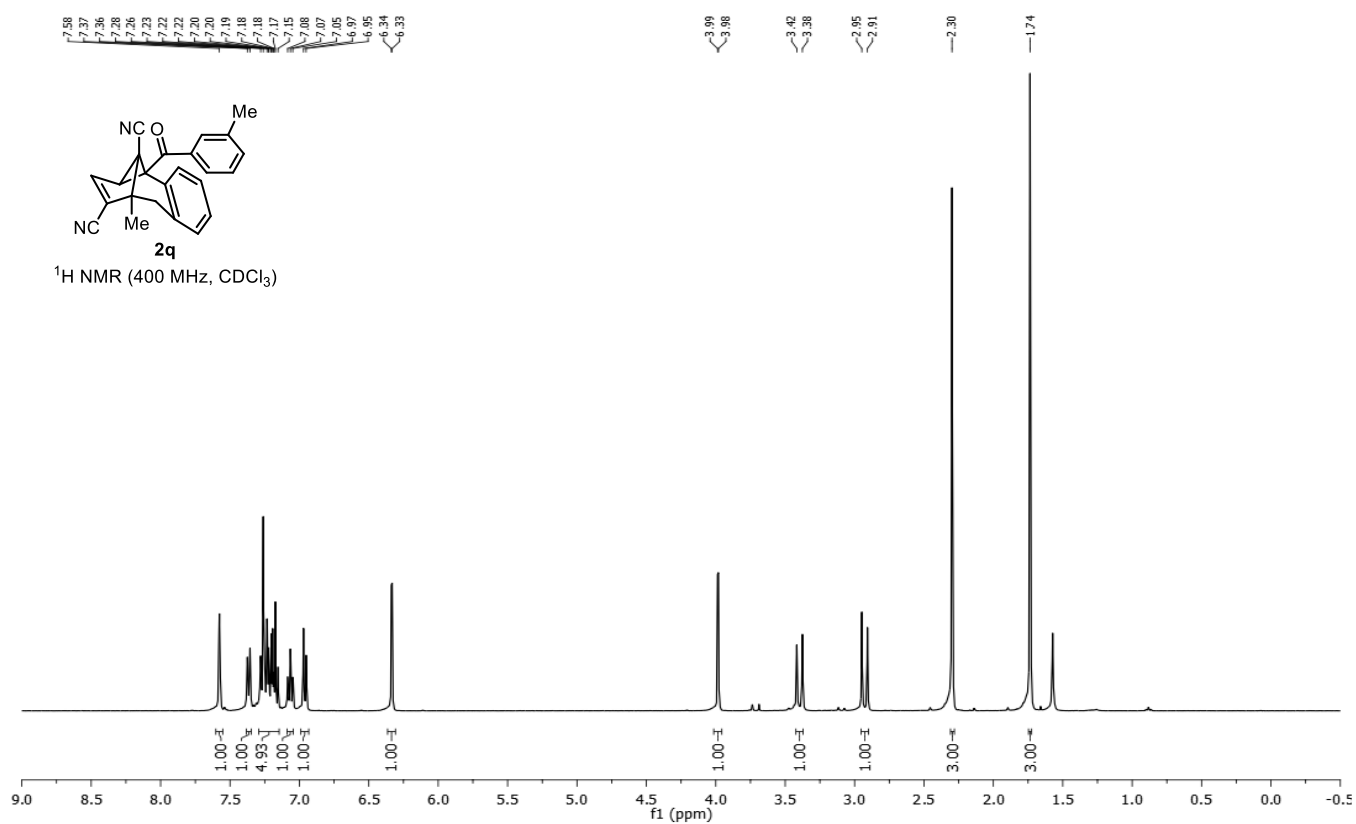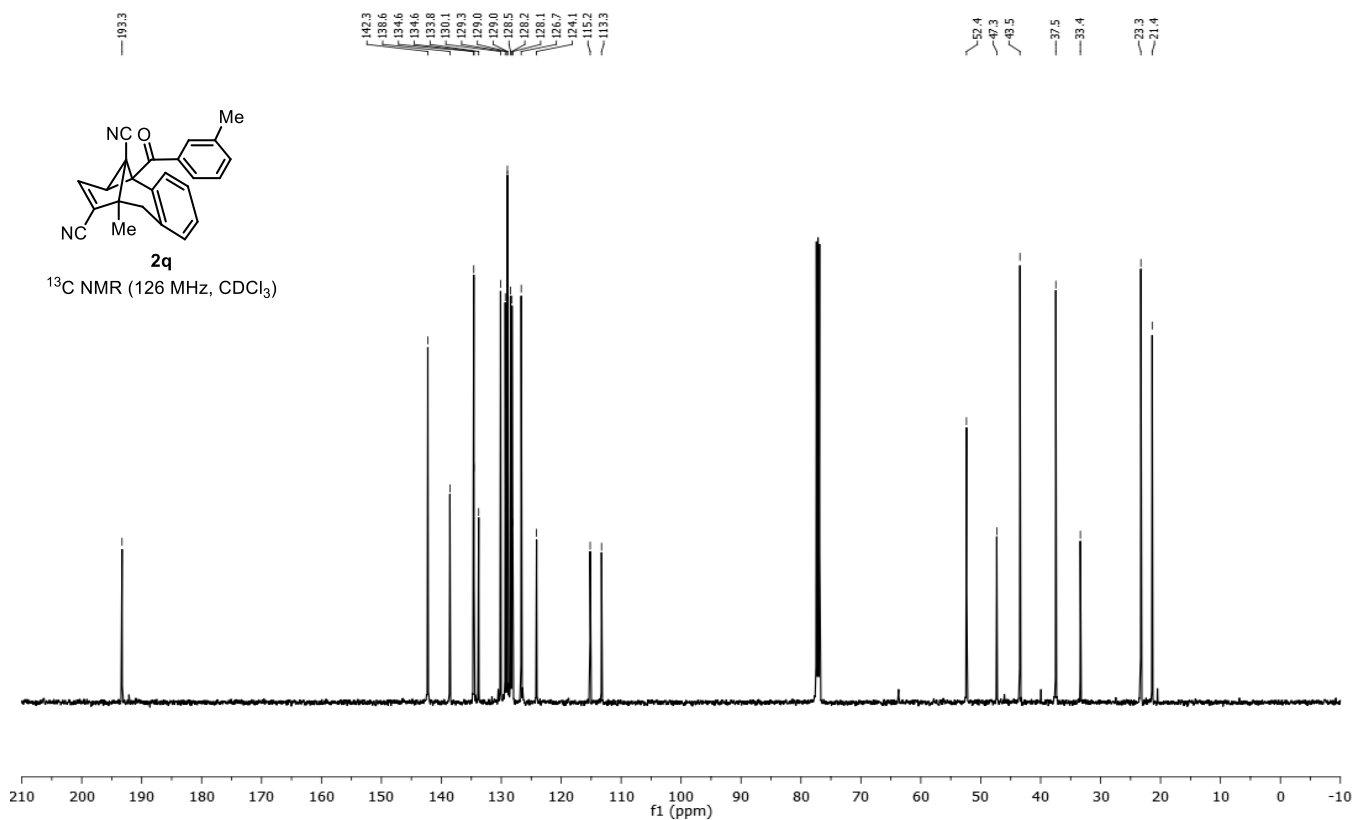

**3,4-Dichlorobenzoyl-2a<sup>1</sup>-isocyano-2a-methyl-2a,2a<sup>1</sup>,7b,7c-tetrahydro-3H-benzo[*f*]cyclopropa[*cd*]indene-2-carbonitrile (2r):**

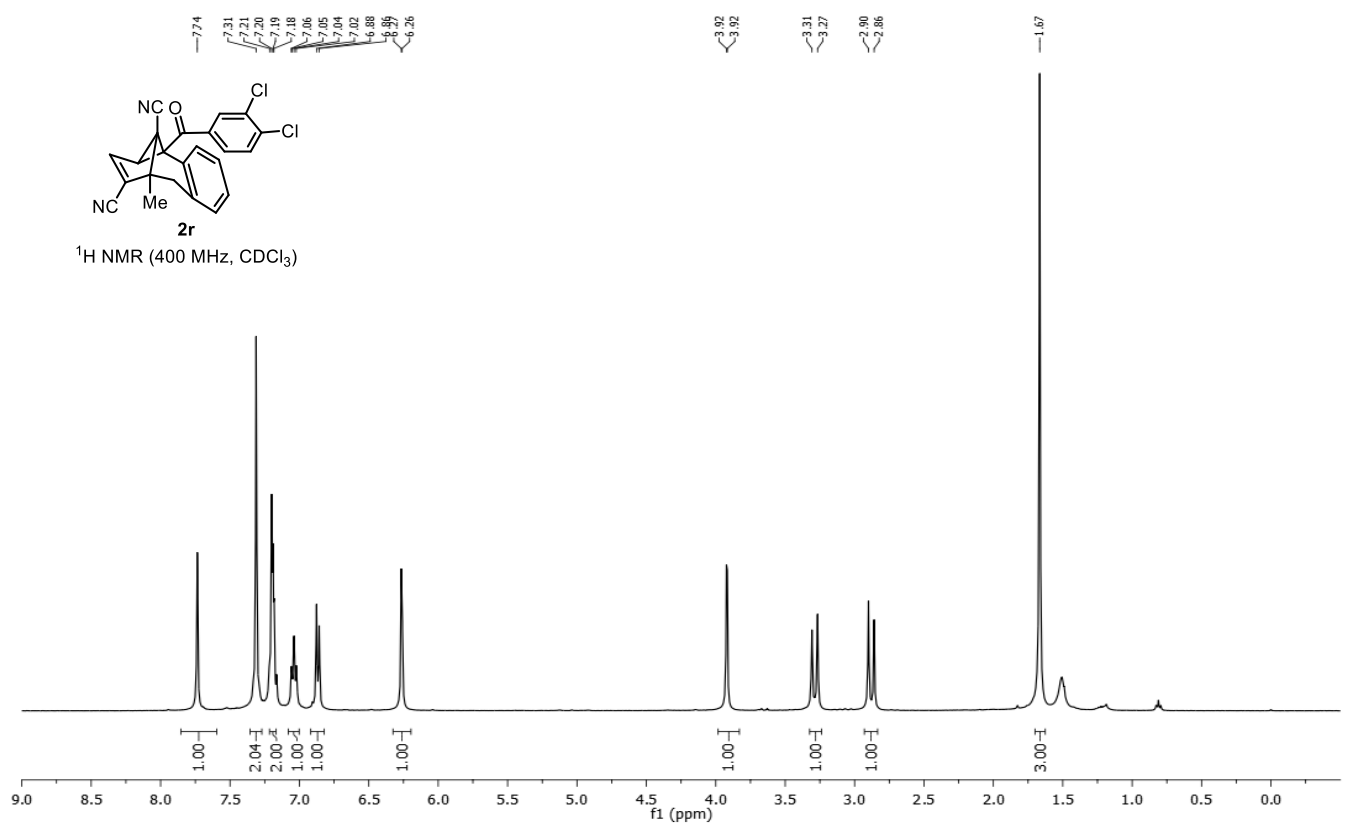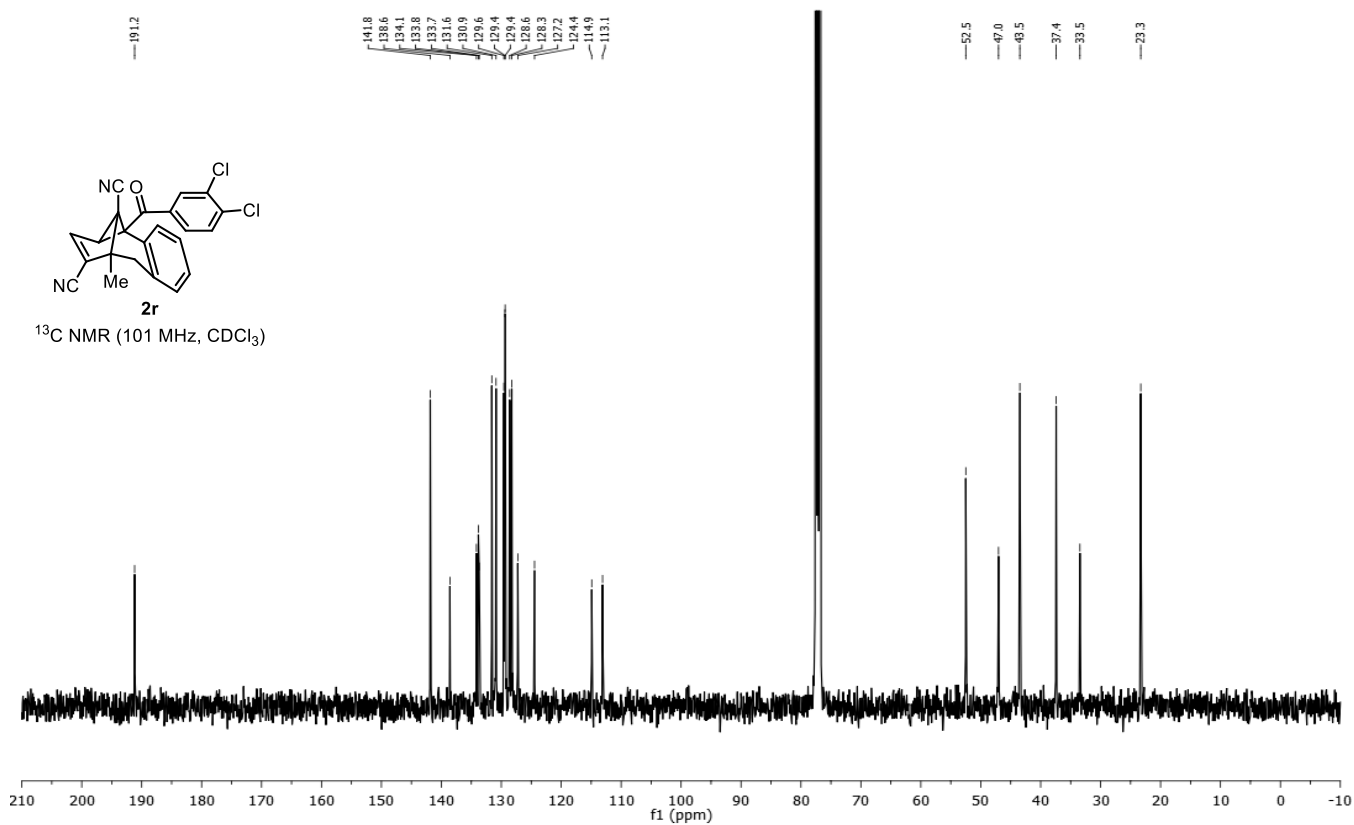



**3-Bromo-4-chlorobenzoyl-2a<sup>1</sup>-isocyano-2a,5-dimethyl-2a,2a<sup>1</sup>,7b,7c-tetrahydro-3H-benzo[*f*]cyclopropa[*cd*]indene-2-carbonitrile (2s):**

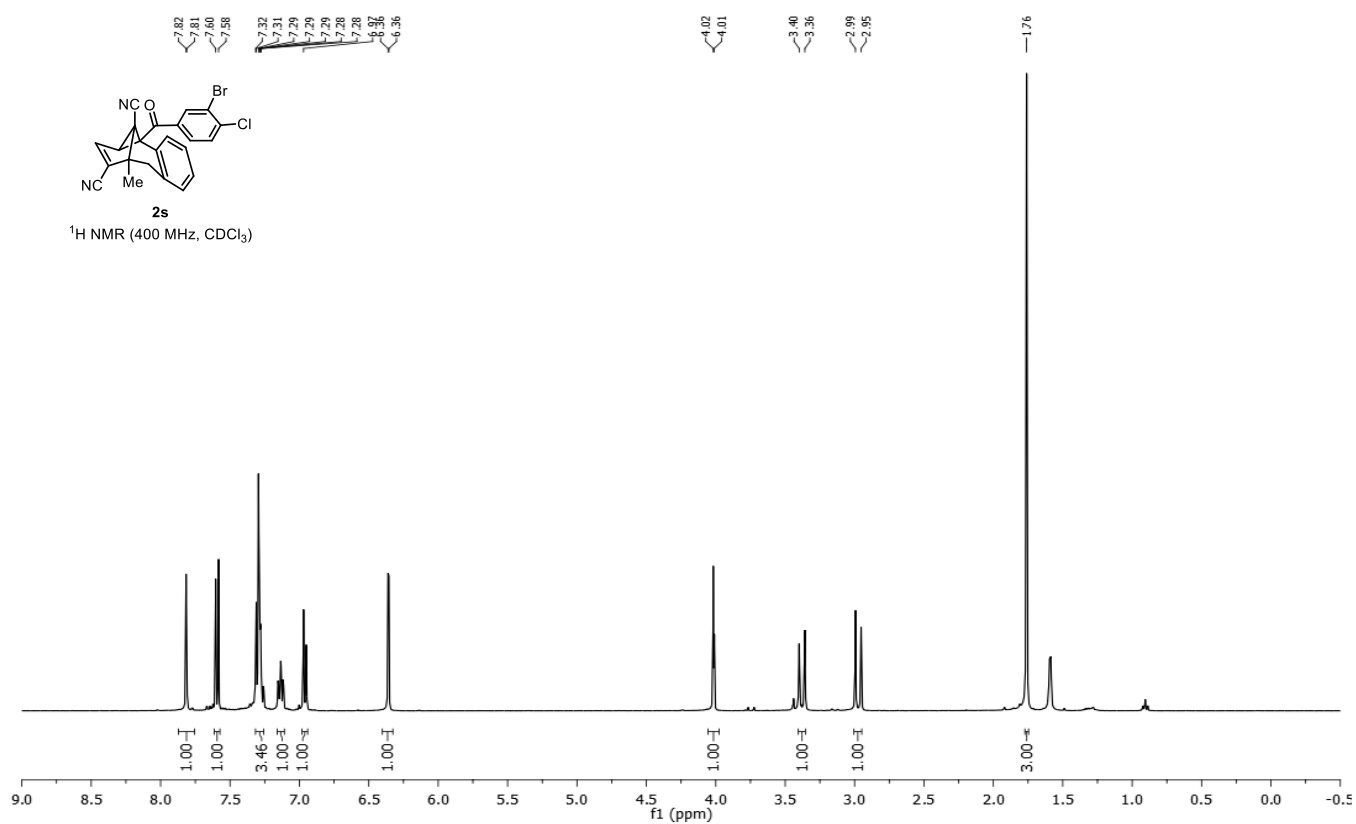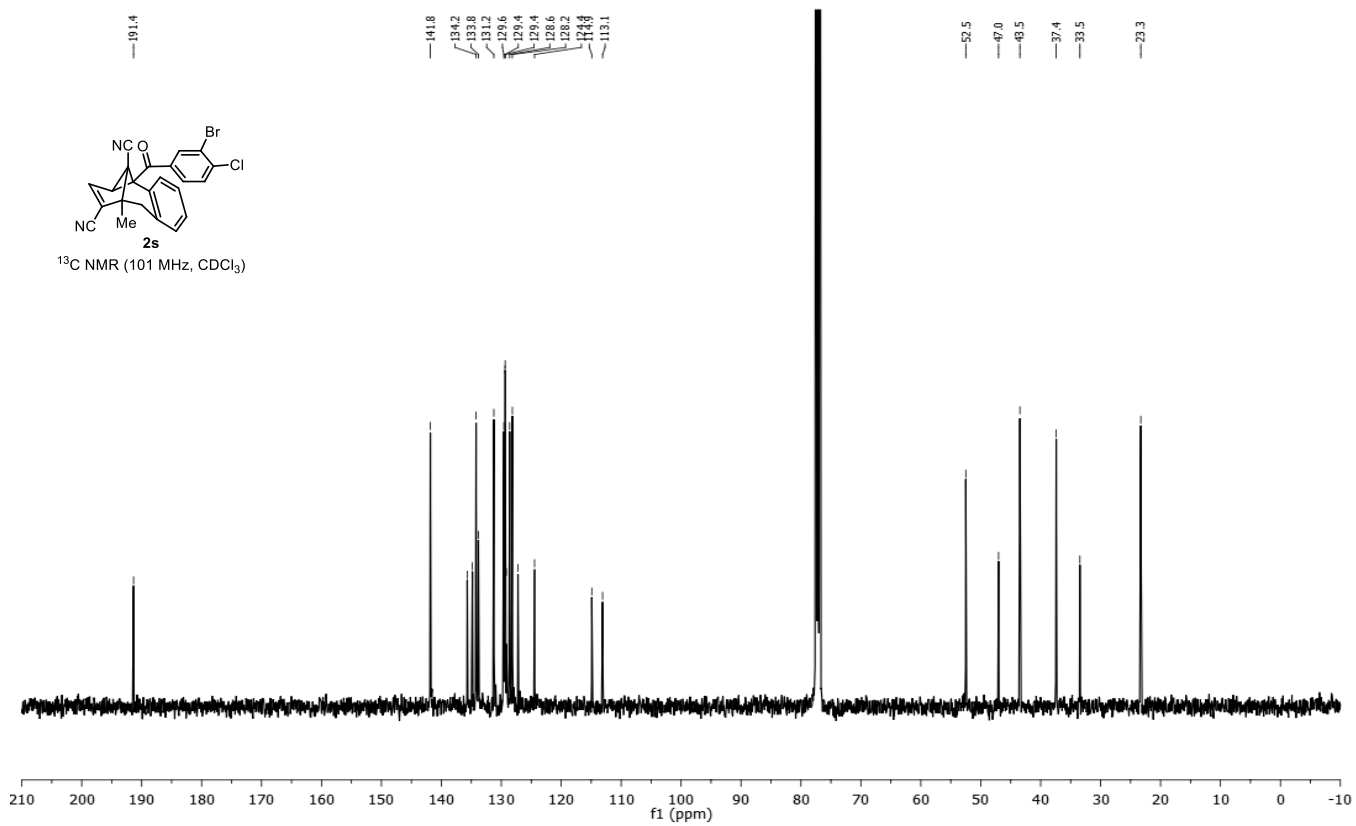

**7b-Benzoyl-2a<sup>1</sup>-isocyano-2a,5-dimethyl-2a,2a<sup>1</sup>,7b,7c-tetrahydro-3H-benzo[*f*]cyclopropa[*cd*]indene-2-carbonitrile (2t):**

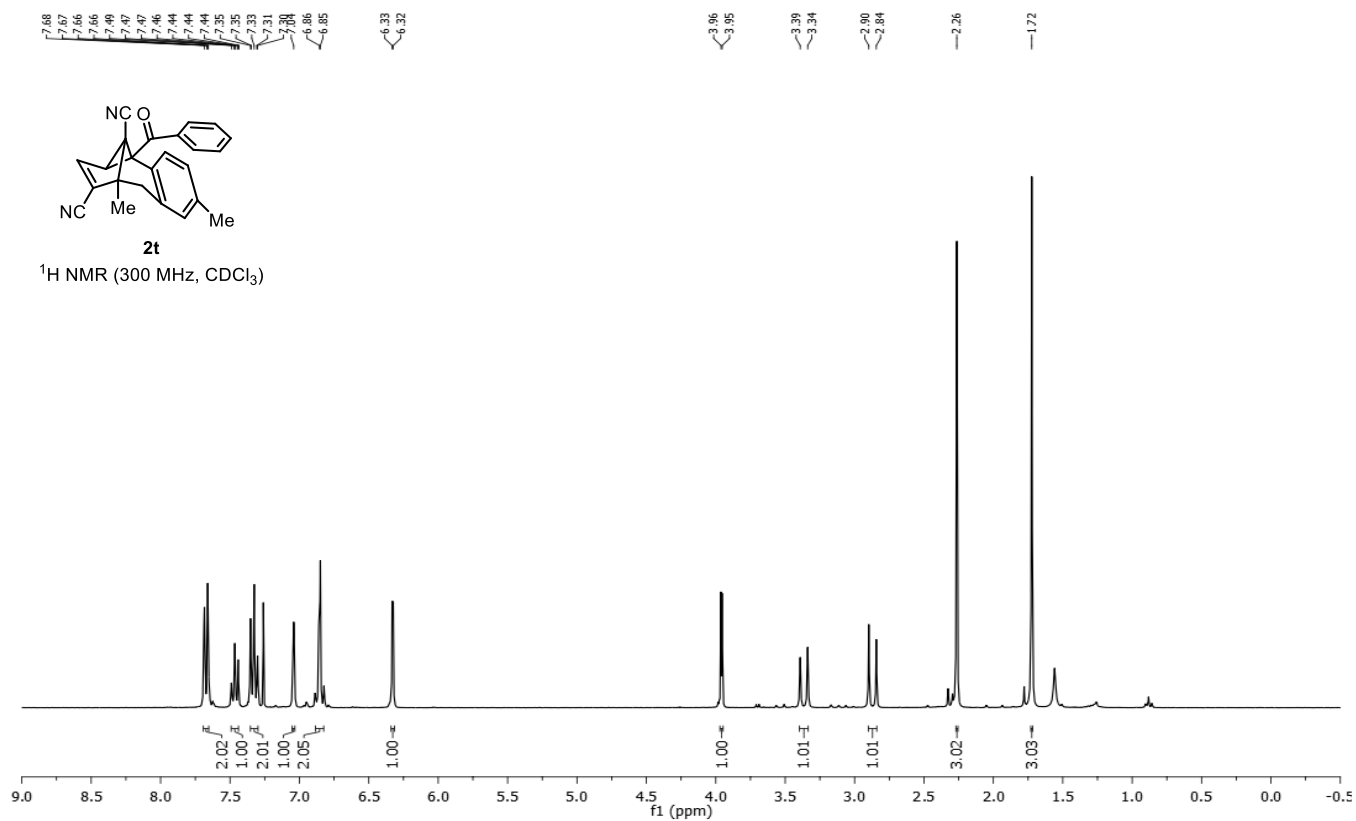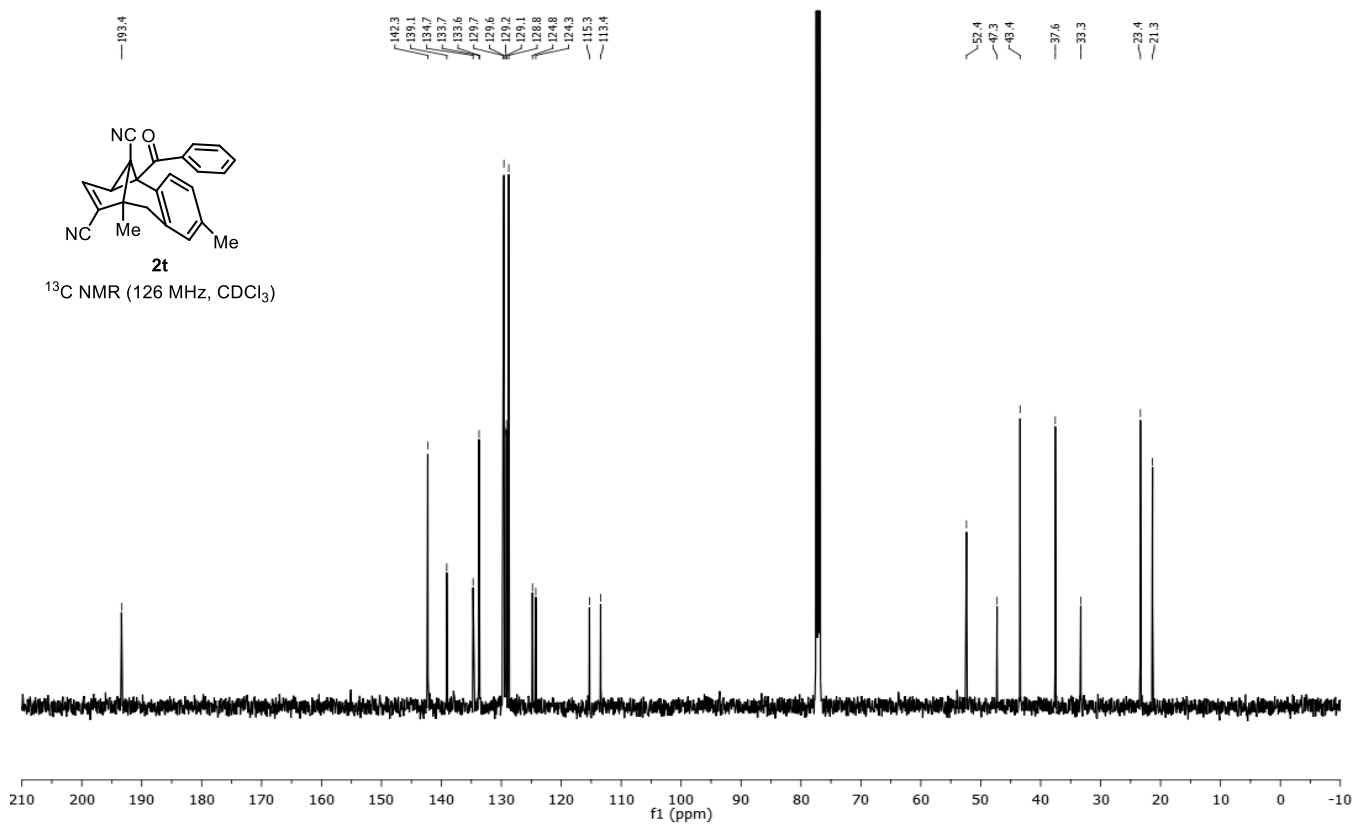

**7b-Benzoyl-6-chloro-2a<sup>1</sup>-isocyano-2a-methyl-2a,2a<sup>1</sup>,7b,7c-tetrahydro-3H-benzo[*f*]cyclopropano[*cd*]indene-2-carbonitrile (2u):**

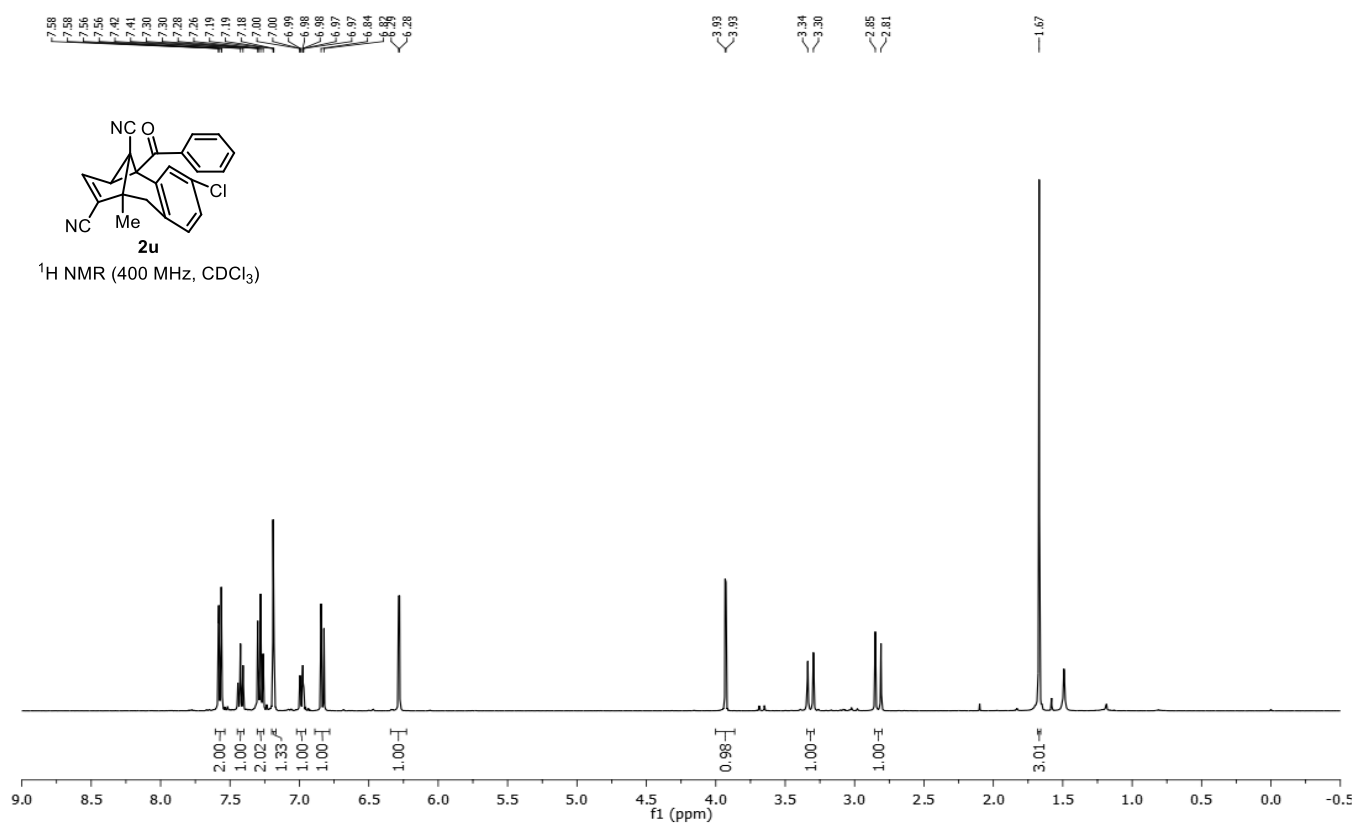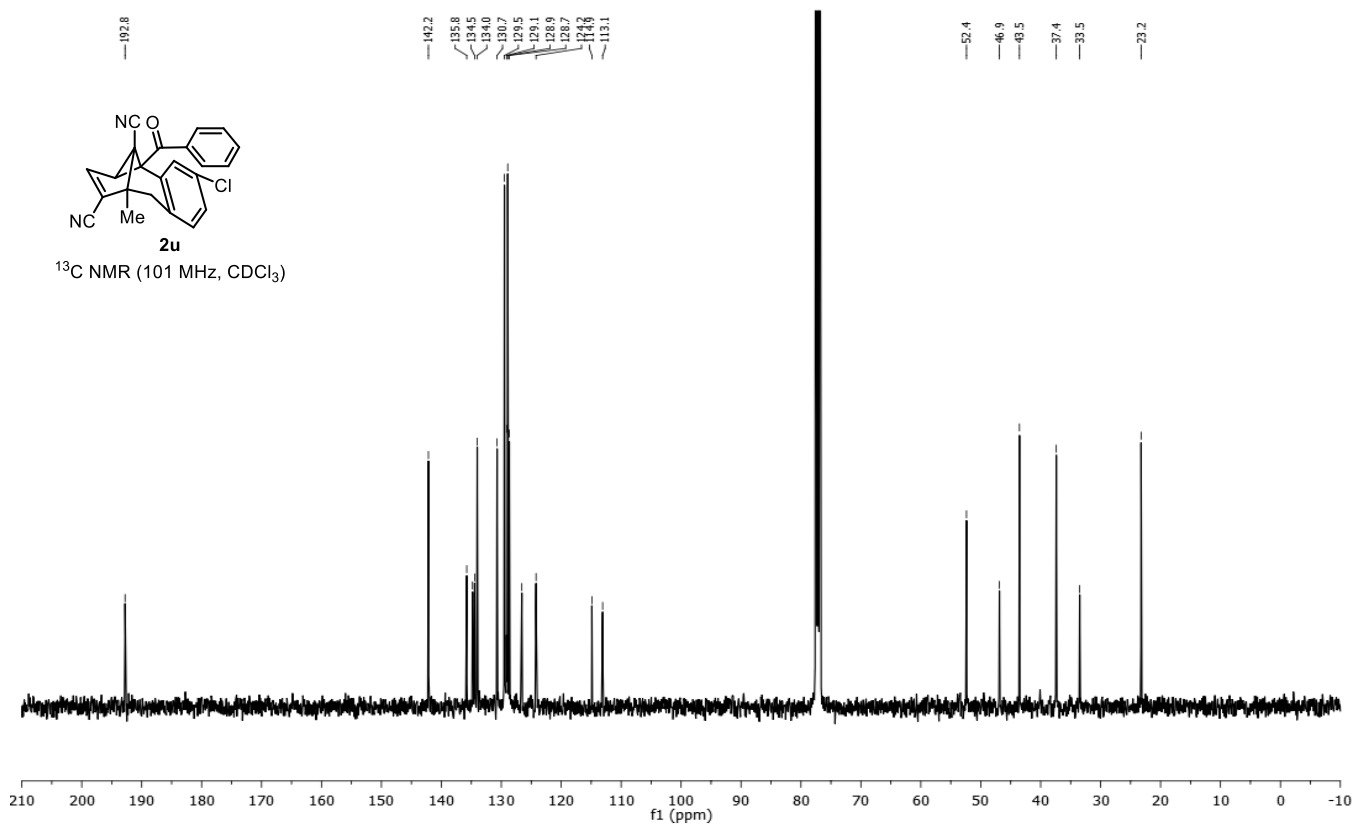

**2a<sup>1</sup>-Isocyano-2a-methyl-7b-(4-(phenylethynyl)benzoyl)-2a,2a<sup>1</sup>,7b,7c-tetrahydro-3H-benzo[*f*]cyclopropano[*cd*]indene-2-carbonitrile (4):**

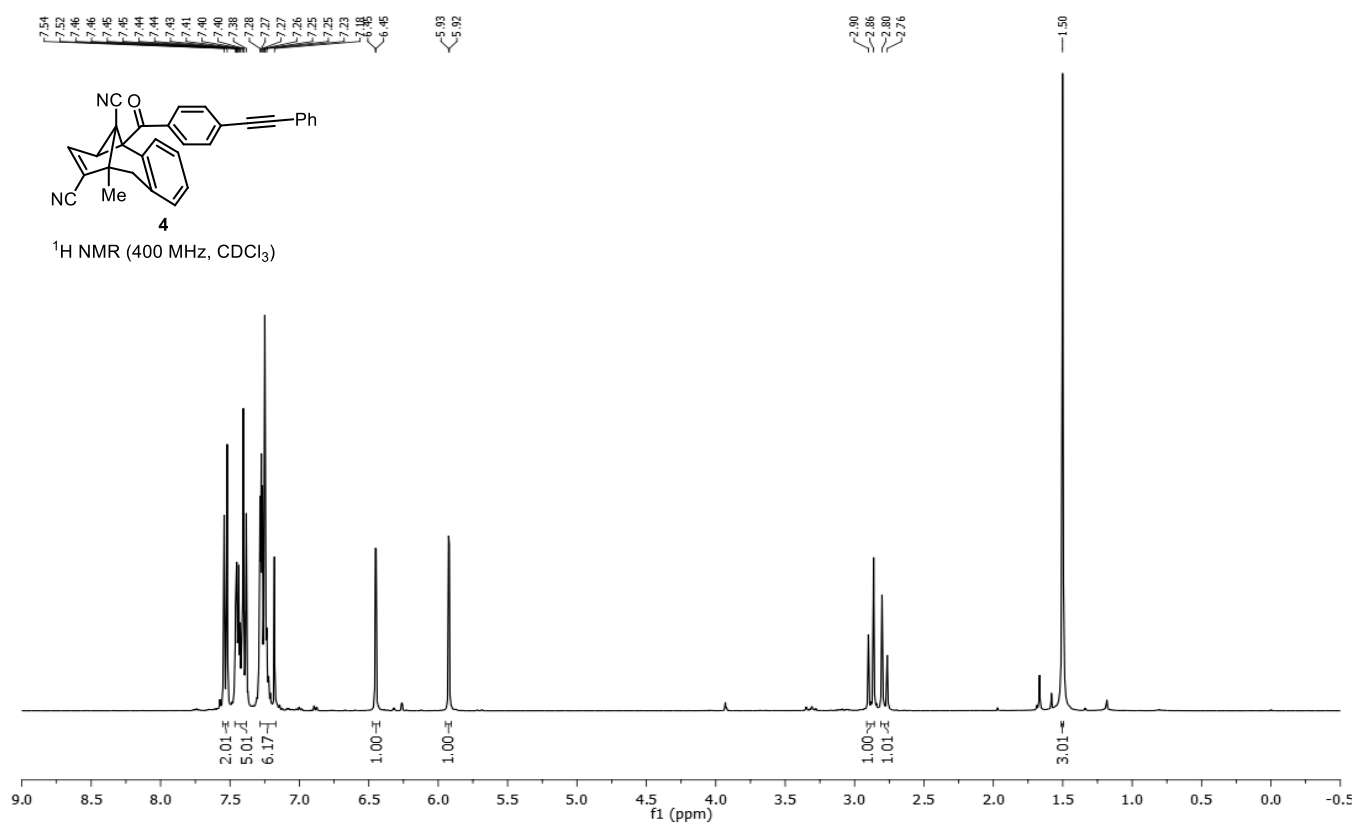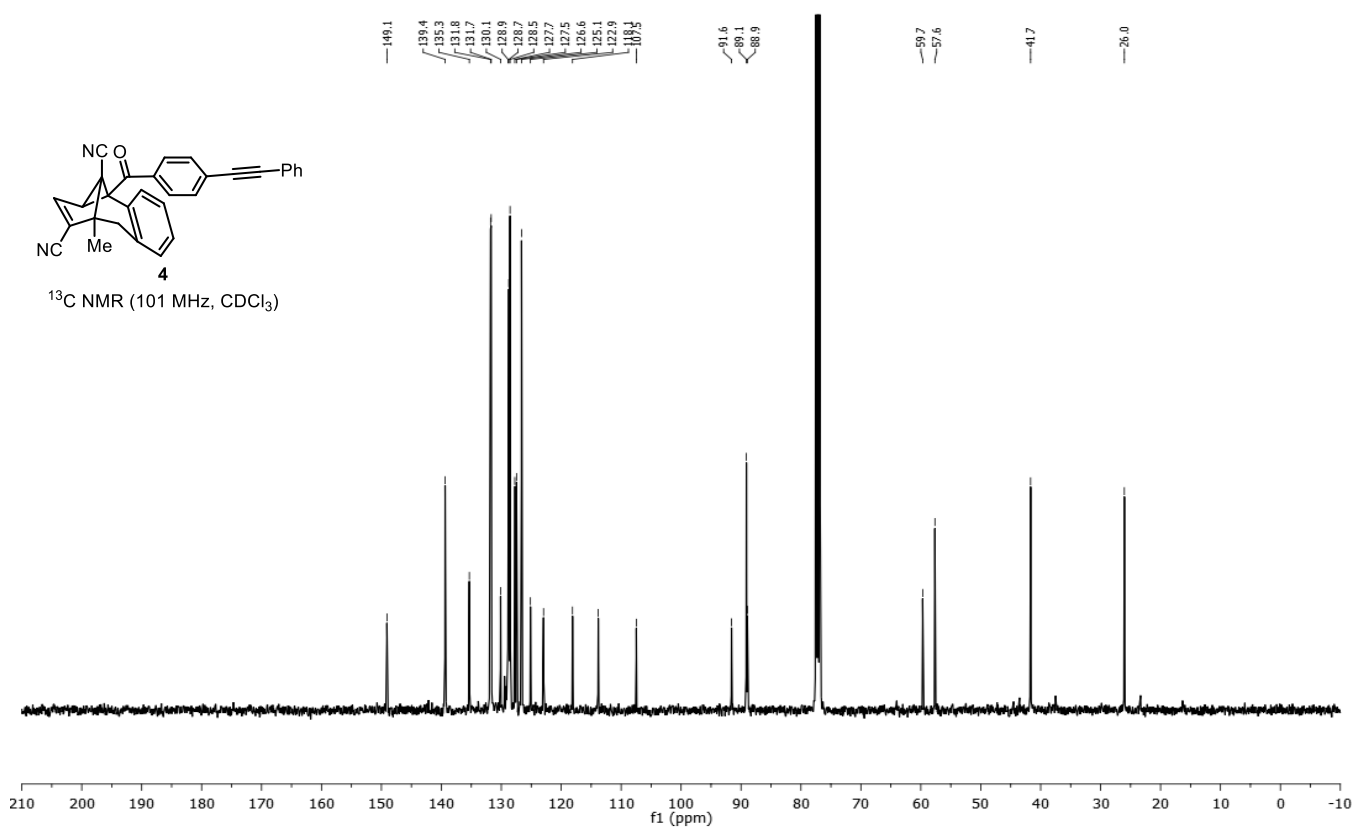

**4-Bromobenzoyl-2a-methyl-2a<sup>1</sup>-((oxo-13-methyl)-14-azaneyl)-2a,2a<sup>1</sup>,7b,7c-tetrahydro-3H-benzo[f]cyclopropa[cd]indene-2-carbonitrile (5):**

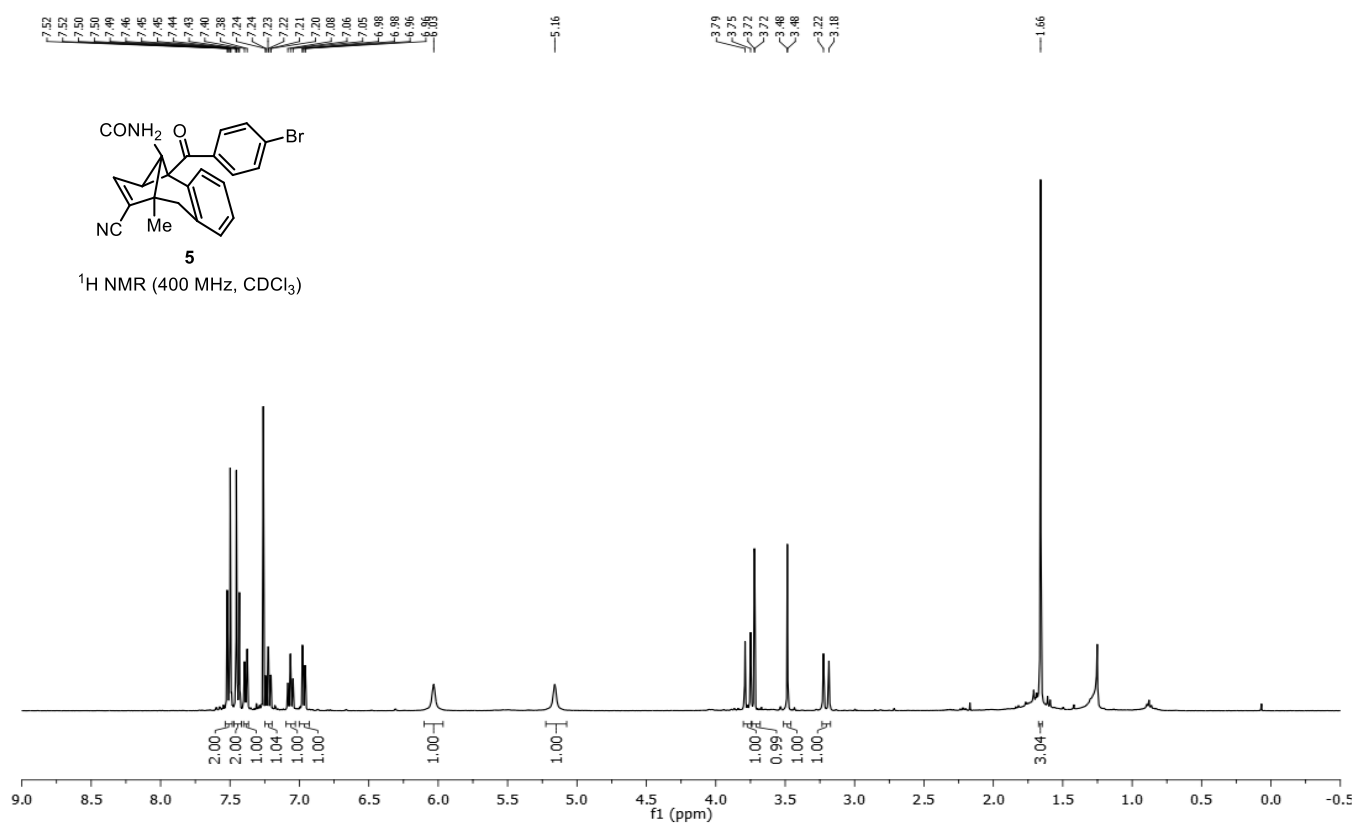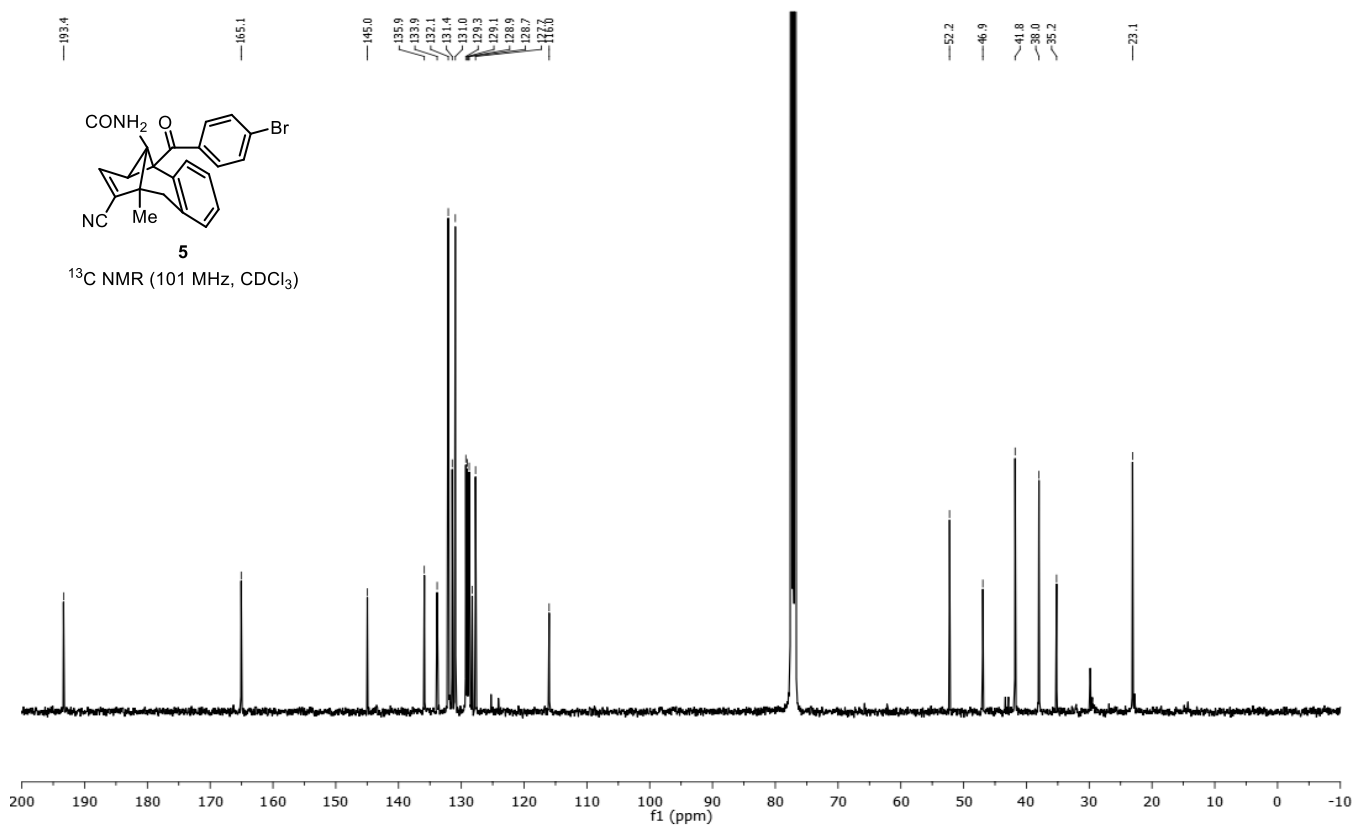

**6b-(4-Bromobenzoyl)-1b-methyl-1b<sup>1</sup>-((oxo-1<sup>3</sup>-methyl)-14-azaneyl)-1b,1b1,2,6b,6c,6d-hexahydro-1aH-benzo[5,6]cyclopropa[3,4]indeno[1,2-b]oxirene-1a-carbonitrile (6):**

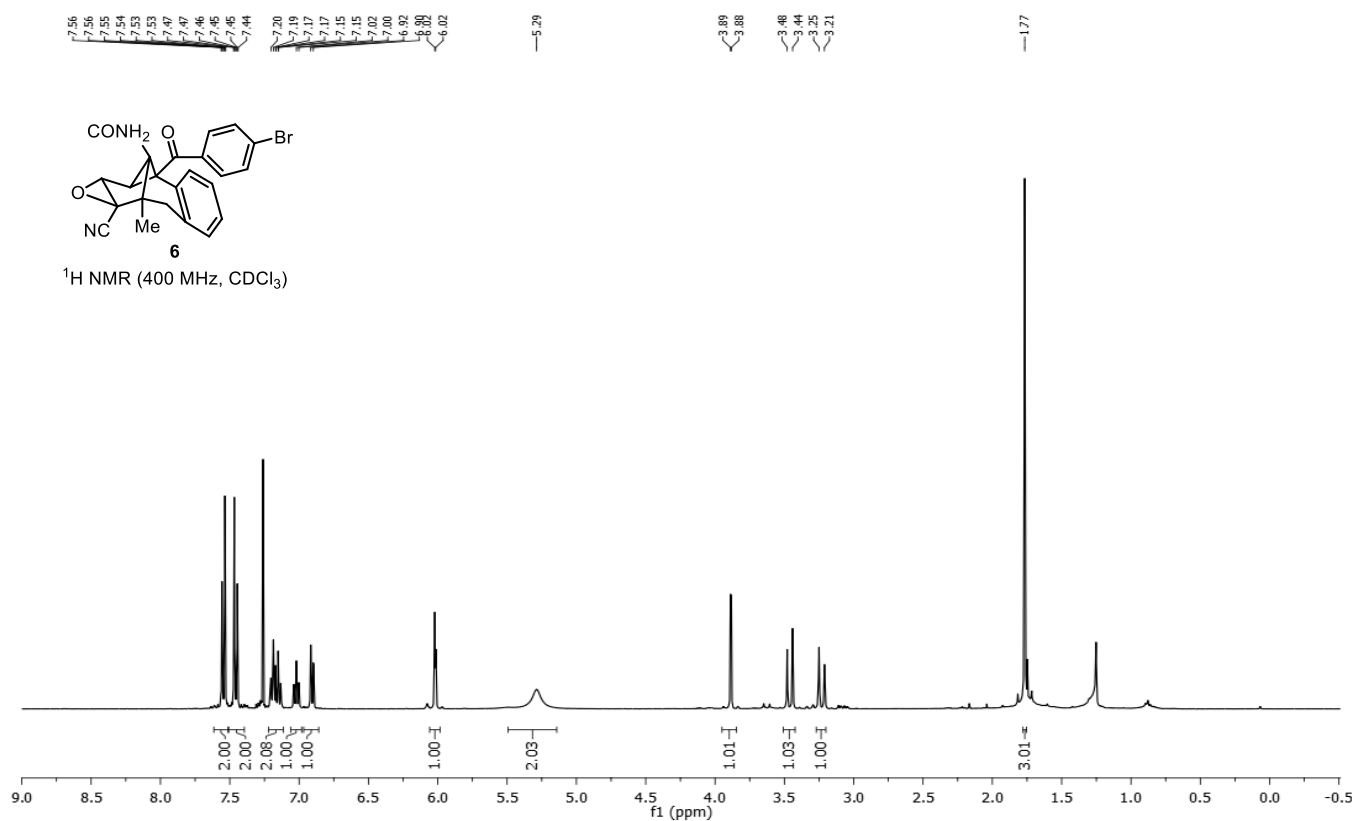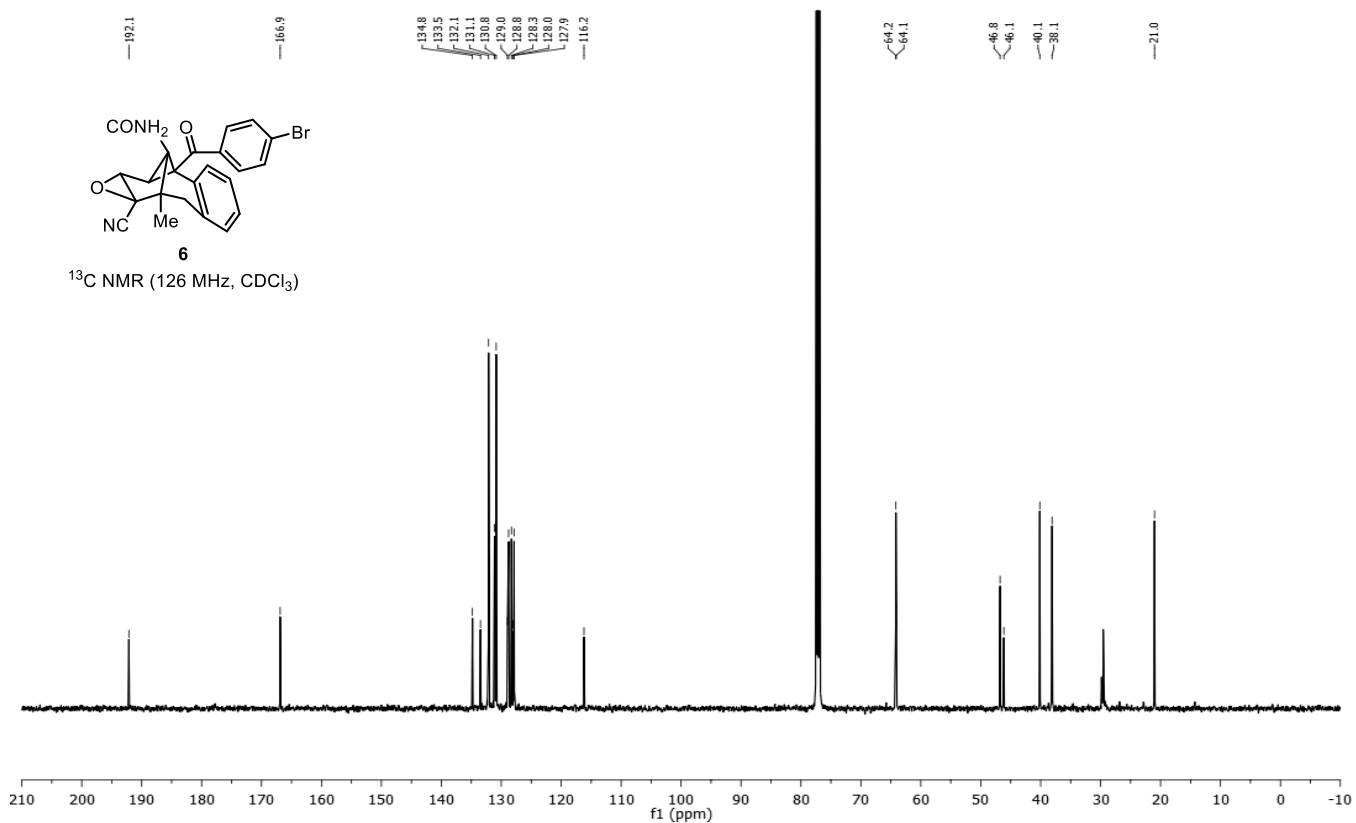

Supplement: d4cc03697b1.pdf [file d4cc03697b1.pdf]
